# Supplementary material for: Understanding the SARS-CoV-2-Human Liver Interactome Using a Comprehensive Analysis of the Individual Virus-Host Interactions.
Source: Preprints.org preprint supplement (doi:10.20944/preprints202402.0757.v1), 2024-02-13
Supplement: Supplementary file 3 [file supplementary]

Archive with 7 entries (7 files):
- Excel files/FILE 1_NODE DEGREE.xlsx
- Excel files/FILE 2_INTERACTIONS BETWEEN NODES.xlsx
- Excel files/FILE 3 Comprehensive Interactions Data in Liver.xlsx
- Letter to the Editor.pdf
- SUPPLEMENTS.pdf
- ARTICLE Understanding the SARS-CoV-2-human liver interactome_ _ _ by G_Colonna.pdf
- ARTICLE Understanding the SARS-CoV-2-human liver interactome_ _ _ by G_Colonna.docx
