# Supplementary material for: Understanding the SARS-CoV-2-Human Liver Interactome Using a Comprehensive Analysis of the Individual Virus-Host Interactions.
Source: Preprints.org preprint supplement (doi:10.20944/preprints202402.0757.v1), 2024-02-13
Supplement: Supplementary file 3 [file supplementary › Excel files/FILE 1_NODE DEGREE.xlsx]

## Sheet: string_node_degrees (35)
Degree of nodes in the network of figure 1
#node	node_degree
ABL1	19
ABRAXAS1	6
ACE	4
ACE2	8
ACKR1	4
ACKR3	4
ACKR4	10
ACTB	55
ACTG1	29
ACTL6A	27
ACTR2	12
ACTR3	7
ADA	1
ADAM17	3
ADIPOR1	2
ADIPOR2	3
ADRB2	6
AGER	8
AGT	5
AGTR2	4
AHR	7
AHSA1	9
AIM2	11
AIMP1	11
AIMP2	10
AIP	5
AKAP13	3
AKT1	82
AKT1S1	15
ALDOA	4
ANAPC1	28
ANAPC10	29
ANAPC11	24
ANAPC16	24
ANAPC2	28
ANAPC4	28
ANAPC5	27
ANAPC7	26
ANLN	8
APBB1IP	7
APC	13
API5	1
APPL1	6
AQR	26
AR	28
ARHGAP1	3
ARHGDIA	4
ARHGEF11	4
ARHGEF12	10
ARHGEF2	2
ARHGEF7	15
ARID1A	23
ARID1B	18
ARID2	18
ARNT	10
ARNT2	5
ARRB1	15
ARRB2	17
ASPM	29
ATF2	9
ATF3	10
ATG14	7
ATG5	11
ATM	36
ATR	15
ATRIP	6
ATRX	4
AURKA	32
AURKB	34
AXIN1	12
AXIN2	9
BABAM1	5
BABAM2	20
BAG1	8
BAG2	7
BAG3	8
BAIAP2	7
BARD1	36
BCAR1	16
BCAS2	26
BCL2L1	14
BCL3	8
BCL9	4
BECN1	21
BIRC2	31
BIRC3	29
BIRC5	37
BLNK	7
BOC	6
BRAF	22
BRCA1	74
BRCA2	24
BRCC3	21
BRD4	15
BRD7	19
BRIP1	12
BTRC	27
BUB1	45
BUB1B	56
BUB3	19
BYSL	37
C3	3
CACNA1C	7
CACYBP	5
CALM3	22
CALML3	21
CALML5	21
CALML6	20
CARD9	12
CARM1	16
CASC3	10
CASP1	23
CASP10	13
CASP3	32
CASP5	9
CASP8	37
CASP9	10
CAV1	26
CAV2	9
CAVIN1	2
CBL	31
CCAR2	2
CCL11	29
CCL13	16
CCL15	3
CCL16	5
CCL17	15
CCL2	38
CCL20	27
CCL21	27
CCL25	14
CCL27	14
CCL3	25
CCL4	29
CCL4L2	5
CCL5	50
CCL7	8
CCL8	17
CCNA1	24
CCNA2	76
CCNB1	66
CCNB2	53
CCND1	34
CCND2	12
CCND3	13
CCNE1	17
CCR1	27
CCR10	6
CCR2	32
CCR3	24
CCR5	33
CCR6	17
CCR7	23
CCRL2	8
CD22	2
CD247	17
CD274	6
CD28	19
CD34	6
CD36	11
CD3D	9
CD3E	8
CD4	43
CD40	27
CD47	5
CD80	10
CD86	11
CDC16	27
CDC20	65
CDC23	28
CDC25C	15
CDC26	27
CDC27	29
CDC37	17
CDC40	34
CDC42	52
CDC5L	39
CDC6	24
CDC73	25
CDCA8	32
CDH1	21
CDH17	6
CDH2	8
CDK1	75
CDK19	21
CDK2	48
CDK4	23
CDK6	18
CDK7	29
CDKN1A	36
CDKN1B	26
CDKN2B	5
CDKN2C	8
CDKN3	7
CDON	5
CDT1	19
CENPE	30
CENPF	34
CEP55	32
CFL1	14
CFLAR	16
CHD3	6
CHEK2	17
CHUK	41
CKS1B	17
CKS2	11
CLEC4D	3
CLEC4E	5
CLEC6A	4
CLEC7A	4
COL1A1	7
COL1A2	7
COL2A1	1
COL3A1	6
COMMD1	7
CREBBP	47
CRK	23
CRKL	21
CRNKL1	35
CSF2	23
CSF3	29
CSF3R	6
CSK	8
CSNK1A1	11
CTBP1	12
CTNNA1	10
CTNNB1	66
CTNNBIP1	2
CTR9	24
CTTN	17
CUL1	36
CUL2	15
CUL5	9
CXCL10	41
CXCL11	28
CXCL12	32
CXCL13	24
CXCL2	28
CXCL5	15
CXCL6	13
CXCL8	46
CXCL9	27
CXCR1	21
CXCR2	25
CXCR3	29
CXCR5	13
CYLD	18
DARS1	10
DAXX	21
DCN	17
DDX58	15
DEPTOR	10
DHX15	32
DHX38	23
DHX8	24
DKC1	9
DLGAP5	35
DMAP1	7
DNAJB1	16
DNAJC6	1
DNMT1	15
DPF2	15
DPP4	5
DUSP1	7
E2F1	28
E2F2	7
E2F4	9
EEA1	5
EEF1E1	10
EEF2	94
EGF	25
EGFR	71
EGLN1	8
EGLN2	7
EGLN3	7
EIF2S1	45
EIF3B	35
EIF4A3	27
EIF4EBP1	9
EIF6	46
ELOB	24
ELOC	27
EP300	61
EP400	10
EPAS1	16
EPOR	10
EPRS1	39
ERBB2	41
ERBB3	28
ERBB4	25
ERC1	3
ERCC3	31
ERCC6	27
ERCC6L	4
EREG	5
ESPL1	21
ESR1	61
ESRRA	1
EXO1	19
EZH2	25
EZR	10
F8	2
FADD	26
FAM83D	1
FANCD2	12
FAS	13
FASLG	18
FAU	91
FBH1	4
FBXL15	2
FBXL3	2
FBXL5	2
FBXO22	3
FBXO4	6
FBXO45	2
FBXO5	21
FBXW11	13
FBXW9	2
FCER1G	19
FCGR3A	13
FCGR3B	14
FKBP4	15
FKBP5	13
FLNA	17
FN1	44
FOS	32
FOSB	12
FOSL1	8
FOSL2	8
FOXO1	25
FOXO3	31
FYN	42
FZR1	32
GAB1	24
GAB2	20
GADD45A	10
GADD45B	8
GADD45G	8
GAPDH	21
GAPDHS	5
GDI2	1
GET4	2
GIT2	5
GJA1	8
GNA12	5
GNLY	4
GP1BA	9
GP6	11
GP9	3
GRB2	55
GRK2	5
GRPEL1	7
GSDMD	13
GSK3B	33
GTF2B	37
GTF2E1	26
GTF2E2	24
GTF2F1	25
GTF2F2	25
GZMA	6
GZMB	11
H2AC18	8
H3-3B	30
H4C6	57
HBEGF	10
HCLS1	19
HDAC1	54
HDAC2	31
HDAC6	9
HGS	9
HHIP	3
HIF1A	35
HIF1AN	5
HIF3A	8
HMGB1	13
HNF4A	12
HNRNPA1	8
HNRNPA2B1	4
HNRNPC	8
HRAS	44
HSP90AA1	70
HSP90AB1	61
HSPA4	44
HSPA8	36
HSPA9	14
HSPB1	11
HSPB8	7
HSPBP1	24
HSPD1	9
HSPE1	6
IARS1	15
IARS2	10
ICAM1	29
ICAM3	3
IFNAR1	13
IFNAR2	10
IFNG	53
IFNGR1	20
IFNGR2	5
IFNL1	5
IFNLR1	8
IHH	7
IKBKB	38
IKBKG	48
IL10	40
IL10RA	10
IL10RB	11
IL13RA1	4
IL18	24
IL18BP	3
IL18R1	5
IL18RAP	3
IL1A	31
IL1B	51
IL1R1	17
IL1R2	5
IL1RAP	9
IL1RL1	5
IL1RN	7
IL2	25
IL22RA1	7
IL26	2
IL27RA	7
IL2RA	13
IL2RB	15
IL2RG	11
IL3	15
IL33	8
IL37	6
IL3RA	6
IL4	25
IL5	16
IL6	55
IL6R	17
IL6ST	18
INTS13	4
INTS3	13
INTS5	15
INTS6	16
INTS7	6
IQGAP1	21
IQGAP2	6
IRAK1	29
IRAK2	8
IRAK3	3
IRS1	31
IRS2	19
ITGA2B	20
ITGA3	7
ITGA5	12
ITGAD	2
ITGAL	13
ITGAM	25
ITGAV	12
ITGB2	32
ITIH4	2
ITSN1	3
JAK1	46
JAK2	48
JUN	51
JUNB	9
JUND	11
KARS1	16
KAT2B	21
KDM2B	1
KDR	32
KIF11	39
KIF20A	35
KIF2C	34
KIF4A	26
KNL1	12
KRAS	46
LARS1	16
LCK	21
LCP2	20
LEF1	12
LEO1	22
LEPR	5
LIF	3
LILRA1	1
LIMK1	8
LSM6	22
LTA	5
LTBR	6
LTV1	33
LUM	7
LY96	5
MAD1L1	10
MAD2L1	44
MAD2L1BP	2
MADCAM1	2
MAF	2
MAGOH	23
MAGOHB	30
MAP2K1	21
MAP2K2	15
MAP2K3	17
MAP3K4	5
MAP3K5	11
MAP3K7	30
MAPK1	46
MAPK14	33
MAPK3	43
MAPK8	49
MAPK8IP1	3
MAPK9	46
MAPKAP1	9
MAPKAPK2	3
MARS1	14
MCAM	1
MCM2	16
MCM4	17
MCM5	18
MCM6	16
MCM7	20
MDC1	15
MDM2	45
MDM4	9
MED1	128
MED10	40
MED11	25
MED12	23
MED14	41
MED15	21
MED16	21
MED17	42
MED18	35
MED20	26
MED21	40
MED23	26
MED25	22
MED26	37
MED27	27
MED28	30
MED30	25
MED31	40
MED4	26
MED8	27
MED9	29
MEFV	14
MET	26
MFAP1	23
MKNK1	3
MLH1	12
MLH3	6
MLKL	8
MMP1	5
MMP10	3
MMP14	4
MMP2	9
MMP3	6
MMP9	15
MRE11	14
MRPL12	47
MRPL17	50
MRPL20	43
MRPL21	46
MRPL27	43
MRPL32	43
MRPL33	41
MRPL9	45
MRPS16	45
MRPS9	45
MSH2	17
MSH3	9
MSH6	15
MSN	7
MTA1	8
MTA2	6
MTOR	35
MVB12A	7
MVB12B	7
MYB	2
MYD88	38
MYLK2	4
NARS1	6
NBN	14
NCAPD2	5
NCAPG	29
NCAPH	12
NCAPH2	4
NCOA3	18
NCOR1	24
NCR1	7
NCR3	6
NDC80	29
NEDD8	19
NEK2	36
NEK7	2
NELFB	24
NFKB1	53
NFKB2	13
NFKBIA	33
NFKBIB	16
NFKBIE	10
NHP2	13
NLRC4	13
NLRP1	11
NLRP3	20
NLRP6	9
NOP10	10
NOS3	9
NR3C1	21
NRAS	39
NRBF2	6
NRF1	2
NRG1	7
NRG2	6
NRG3	4
NRIP1	4
NRP1	2
NSL1	6
NTRK2	7
NUF2	33
NUP155	4
NUP214	5
NUP54	4
NUP98	7
NUSAP1	32
OASL	2
OPTN	6
ORC1	15
ORC2	13
ORC3	11
ORC5	11
ORC6	11
OTULIN	4
PA2G4	76
PAF1	21
PAG1	2
PAK1	12
PAK2	8
PAK4	6
PAK6	8
PALB2	11
PARD3	7
PARD6A	8
PARD6B	7
PARS2	10
PARVA	6
PBK	26
PBRM1	19
PCNA	32
PDGFA	7
PDGFB	8
PDGFC	8
PDGFD	7
PDGFRA	32
PDGFRB	32
PDPK1	12
PF4	23
PF4V1	14
PFN1	13
PFN3	10
PFN4	11
PGK1	5
PGK2	4
PHF10	18
PHLPP1	3
PIAS1	8
PIAS2	5
PIAS3	6
PIK3C3	19
PIK3CA	56
PIK3CB	50
PIK3CD	49
PIK3R1	59
PIK3R2	50
PIK3R3	49
PIK3R4	8
PKN1	5
PLAT	3
PLAU	3
PLAUR	3
PLCG1	34
PLK1	37
PML	8
PMS2	11
POLR1A	27
POLR1D	20
POLR1E	10
POLR2A	56
POLR2B	60
POLR2C	80
POLR2D	46
POLR2E	60
POLR2F	61
POLR2G	45
POLR2H	51
POLR2I	39
POLR2J	43
POLR2K	50
POLR2L	52
POLR3A	29
POLR3B	24
POLR3C	13
POLR3E	13
POLR3F	14
POLR3H	14
POLR3K	12
POU5F1	6
PPARA	6
PPARG	30
PPARGC1A	15
PPBP	15
PPID	9
PPIL1	25
PPP1R13L	3
PPP2R1A	17
PRC1	20
PRF1	9
PRKCI	14
PRKCZ	25
PRPF19	40
PRPF31	22
PSEN1	6
PSMA2	25
PSMA3	26
PSMA4	26
PSMA5	26
PSMA6	26
PSMA7	26
PSMB1	26
PSMB2	27
PSMB4	25
PSMB6	26
PSMB7	25
PSMC1	30
PSMC4	26
PSMC5	30
PSMD1	29
PSMD11	28
PSMD12	28
PSMD2	28
PSMD3	27
PSMD4	30
PSMD5	13
PSMD7	26
PSMD8	28
PTCH1	8
PTCH2	6
PTEN	37
PTGES	2
PTGES3	23
PTGS2	8
PTK2	46
PTK2B	17
PTPN11	50
PTPN12	7
PTPN22	3
PTPN7	5
PTPRC	15
PTTG1	22
PTX3	2
PXN	26
PYCARD	13
QARS1	23
RAB4A	3
RAB5A	13
RAB5B	3
RABEP1	4
RABGEF1	5
RAC1	11
RACK1	96
RAD23B	8
RAD50	7
RAF1	34
RALA	6
RALGDS	9
RANBP2	12
RANGAP1	9
RAP1A	24
RAPGEF1	7
RARS1	16
RARS2	11
RASA1	12
RASSF5	11
RB1	24
RBBP4	15
RBBP7	13
RBCK1	11
RBM17	10
RBM22	36
RBSN	2
RBX1	45
RCOR1	11
REL	13
RELA	53
RELB	10
REN	4
RHEB	11
RHOA	39
RICTOR	11
RIOK2	36
RIPK1	41
RIPK3	17
RND3	1
RNF168	11
RNF31	17
RNF7	12
RNF8	9
ROCK1	13
ROCK2	10
RPA1	15
RPL10A	95
RPL10L	91
RPL11	104
RPL12	93
RPL13	84
RPL13A	98
RPL14	84
RPL15	86
RPL17	95
RPL18	84
RPL18A	84
RPL19	85
RPL21	87
RPL22	84
RPL23	105
RPL23A	104
RPL24	84
RPL26	96
RPL27	84
RPL27A	85
RPL29	84
RPL3	95
RPL30	85
RPL31	85
RPL32	83
RPL34	84
RPL35	101
RPL35A	84
RPL36	84
RPL36A	82
RPL36AL	82
RPL37	84
RPL37A	84
RPL38	86
RPL39	84
RPL4	96
RPL5	107
RPL6	84
RPL7	95
RPL7A	85
RPL8	95
RPL9	94
RPLP0	98
RPLP1	82
RPLP2	82
RPS10	87
RPS11	108
RPS12	87
RPS13	100
RPS14	101
RPS15	107
RPS15A	88
RPS16	100
RPS17	87
RPS18	108
RPS19	90
RPS2	100
RPS20	101
RPS21	88
RPS23	101
RPS24	90
RPS25	86
RPS26	88
RPS27	87
RPS27A	161
RPS27L	82
RPS28	88
RPS29	98
RPS3	109
RPS3A	89
RPS4X	87
RPS4Y1	81
RPS5	99
RPS6	93
RPS6KA1	8
RPS6KB1	24
RPS7	88
RPS8	89
RPS9	102
RPSA	99
RPTOR	17
RRAGA	7
RRAGB	8
RRAGC	6
RRAS	15
RRM1	8
RRM2	21
RRM2B	3
RTF1	21
RTKN	1
RUVBL1	25
RYR1	6
RYR2	7
S100A12	4
S100A8	8
S100A9	3
S100B	3
SAE1	6
SAP30	6
SART1	26
SDC1	7
SDC4	4
SELL	13
SELP	15
SELPLG	6
SENP1	5
SERPINE1	5
SF1	9
SF3A1	34
SF3A2	34
SF3A3	33
SF3B1	35
SF3B2	32
SF3B3	36
SF3B4	30
SF3B5	32
SFN	19
SGTA	6
SH2D1A	2
SHC1	37
SHH	7
SIN3B	6
SIRPG	3
SIRT1	26
SKP1	40
SKP2	31
SLC6A19	1
SLC9A3R1	5
SLU7	22
SMAD3	36
SMARCA2	19
SMARCA4	36
SMARCB1	20
SMARCC1	18
SMARCC2	19
SMARCD1	20
SMARCD2	17
SMARCD3	18
SMARCE1	20
SMC2	7
SMC4	8
SMO	8
SNRNP200	40
SNRNP40	29
SNRPA	25
SNRPA1	40
SNRPB2	39
SNRPC	17
SNRPD1	38
SNRPD2	40
SNRPD3	41
SNRPF	41
SOCS1	19
SOCS3	19
SOS1	26
SOS2	13
SP1	26
SPC24	9
SPC25	10
SPDYA	4
SPRY2	3
SRC	97
SRPK1	3
SRSF1	26
SRF9	1
SRSF10	1
ST13	5
STAT1	40
STAT3	73
STAT5A	23
STAT5B	24
STIP1	12
STK4	4
STUB1	21
SUGP1	4
SUGT1	4
SUMO1	19
SUMO2	21
SUMO3	8
SUMO4	6
SUPT4H1	23
SUPT5H	29
SUPT6H	22
SUV39H1	7
SYF2	22
SYK	40
SYNCRIP	7
TAB1	23
TAB2	25
TAB3	16
TANK	12
TBK1	26
TBKBP1	4
TBP	41
TCF7	10
TCF7L1	8
TELO2	9
TEP1	7
TERT	15
TFDP1	5
TFIP11	11
THBS1	10
TICAM1	15
TIMM44	5
TIMP1	9
TIMP2	6
TIRAP	12
TJP1	15
TLN1	20
TLN2	19
TLR2	28
TLR3	19
TLR4	59
TLR7	7
TLR8	3
TLR9	10
TMPRSS2	3
TNF	84
TNFAIP3	15
TNFAIP6	2
TNFRSF10A	11
TNFRSF10B	12
TNFRSF12A	3
TNFRSF14	5
TNFRSF1A	41
TNFRSF1B	10
TNFSF12	2
TNIP1	6
TNK2	2
TNPO1	3
TOMM20	3
TOMM22	5
TOMM7	3
TOMM70	8
TOP2A	35
TOPBP1	12
TP53	133
TP53BP1	23
TP53BP2	2
TPI1	5
TPX2	35
TRADD	30
TRAF1	14
TRAF2	49
TRAF3	26
TRAF5	24
TRIM25	5
TRIP10	3
TRRAP	15
TSG101	14
TSR2	1
TTI1	8
TTK	30
TUFM	47
TWISTNB	11
TYK2	22
TYROBP	13
U2AF1	10
U2AF2	23
UBA1	8
UBA2	6
UBA52	150
UBE2C	51
UBE2D1	23
UBE2I	20
UBE2K	5
UBE2N	22
UBE2S	24
UBE2V1	7
UBL4A	2
UBQLN4	15
UCHL5	30
ULK1	10
UPF3A	5
UPF3B	5
URI1	2
USP14	26
USP7	11
UVRAG	6
VASP	17
VAV1	26
VCAM1	14
VCL	28
VEGFB	3
VEGFD	2
VHL	18
VPS28	8
VPS37A	7
VPS37B	7
VPS37C	7
VTN	10
VWF	12
WAS	24
WASL	23
WIPF1	10
WIPF2	4
WIPF3	4
WRAP53	6
XAB2	33
XIAP	22
YARS1	11
YWHAE	7
YY1	17
ZAP70	26
ZNRD1	9
ZWINT	22
ZYX	9
