# Supplementary material for: Understanding the SARS-CoV-2-Human Liver Interactome Using a Comprehensive Analysis of the Individual Virus-Host Interactions.
Source: Preprints.org preprint supplement (doi:10.20944/preprints202402.0757.v1), 2024-02-13
Supplement: Supplementary file 3 [file supplementary › Excel files/FILE 2_INTERACTIONS BETWEEN NODES.xlsx]

## Sheet: string_interactions (1)
		Interactions of the network in figure 1
#node1	node2	coexpression	experimentally_determined_interaction	database_annotated	automated_textmining	combined_score
ABL1	ATM	0	0.820	0.750	0.774	0.988
ABL1	BRCA1	0	0.483	0.500	0.847	0.956
ABL1	CBL	0.063	0.896	0.900	0.685	0.996					26,988 interactions
ABL1	CRK	0.056	0.986	0.900	0.953	0.999
ABL1	CRKL	0.049	0.887	0.900	0.855	0.998					Data from STRING
ABL1	CTNNB1	0.095	0.539	0.500	0.785	0.949
ABL1	FN1	0.078	0.900	0	0.634	0.963
ABL1	FYN	0.083	0.136	0.900	0.422	0.949
ABL1	GRB2	0.083	0.846	0.900	0.973	0.999
ABL1	HSP90AA1	0.080	0.788	0	0.922	0.983
ABL1	HSP90AB1	0.091	0.224	0	0.909	0.930
ABL1	NTRK2	0	0	0.900	0.145	0.910
ABL1	NUP214	0.058	0	0	0.906	0.907
ABL1	PIK3C3	0	0.053	0	0.947	0.947
ABL1	RB1	0.049	0.736	0.900	0.312	0.980
ABL1	SHC1	0.141	0.610	0.900	0.776	0.991
ABL1	STAT5A	0.088	0.332	0.900	0.724	0.980
ABL1	STAT5B	0.065	0.439	0.900	0.727	0.983
ABL1	TP53	0.056	0.292	0	0.875	0.909
ABRAXAS1	BABAM1	0	0.994	0.900	0.997	0.999
ABRAXAS1	BABAM2	0	0.994	0.900	0.997	0.999
ABRAXAS1	BARD1	0.042	0.994	0.900	0.993	0.999
ABRAXAS1	BRCA1	0.056	0.994	0.900	0.997	0.999
ABRAXAS1	BRCC3	0.042	0.997	0.900	0.998	0.999
ABRAXAS1	MDC1	0	0.443	0.500	0.748	0.923
ACE	ACE2	0.042	0	0	0.952	0.956
ACE	AGT	0	0.733	0.750	0.989	0.999
ACE	AGTR2	0.042	0	0	0.948	0.948
ACE	REN	0.044	0	0	0.987	0.987
ACE2	ACE	0.042	0	0	0.952	0.956
ACE2	AGT	0.042	0.739	0.750	0.989	0.999
ACE2	AGTR2	0.072	0	0	0.952	0.954
ACE2	DPP4	0.060	0	0.900	0.995	0.999
ACE2	IL2	0	0.900	0	0.653	0.963
ACE2	REN	0.053	0	0	0.960	0.960
ACE2	SLC6A19	0.152	0.981	0	0.996	0.999
ACE2	TMPRSS2	0.111	0.292	0	0.999	0.999
ACKR1	CCL2	0.049	0.292	0	0.993	0.994
ACKR1	CCL5	0.056	0	0	0.993	0.993
ACKR1	CXCL8	0	0.292	0.900	0.990	0.999
ACKR1	TNFRSF14	0.042	0	0	0.998	0.998
ACKR3	ARRB2	0	0.797	0	0.848	0.967
ACKR3	CCL21	0	0	0.500	0.816	0.904
ACKR3	CXCL11	0	0	0.500	0.997	0.998
ACKR3	CXCL12	0.076	0.900	0.900	0.997	0.999
ACKR4	CCL13	0.120	0.287	0.900	0.651	0.975
ACKR4	CCL17	0.081	0	0	0.978	0.979
ACKR4	CCL20	0	0	0	0.928	0.928
ACKR4	CCL21	0.084	0.287	0.900	0.997	0.999
ACKR4	CCL25	0.043	0.287	0.900	0.995	0.999
ACKR4	CCL27	0.044	0	0	0.998	0.998
ACKR4	CCL5	0.077	0	0	0.938	0.940
ACKR4	CCL8	0.142	0.287	0.900	0.815	0.987
ACKR4	CCR7	0.055	0	0.900	0.668	0.965
ACKR4	CXCL13	0.064	0.287	0	0.990	0.992
ACTB	ACTG1	0.778	0.983	0.900	0.795	0.999
ACTB	ACTL6A	0.053	0.939	0.900	0.980	0.999
ACTB	ACTR2	0.335	0.525	0.900	0.128	0.968
ACTB	ACTR3	0.268	0.443	0.900	0.086	0.957
ACTB	AKT1	0.105	0.313	0	0.885	0.923
ACTB	ARID1A	0.064	0.883	0.800	0.825	0.995
ACTB	ARID1B	0.049	0.218	0.800	0.691	0.947
ACTB	ARID2	0	0.806	0.800	0.610	0.983
ACTB	BAIAP2	0.042	0.461	0.900	0.166	0.951
ACTB	BRD7	0.047	0.862	0.800	0.495	0.985
ACTB	CASP3	0.042	0.095	0.900	0.893	0.989
ACTB	CDC42	0.415	0.070	0.900	0.596	0.975
ACTB	CFL1	0.403	0.987	0.900	0.834	0.999
ACTB	CTNNA1	0.072	0.108	0.900	0.550	0.957
ACTB	DMAP1	0.067	0.416	0.900	0.488	0.968
ACTB	EP400	0.042	0.411	0.900	0.454	0.965
ACTB	ERBB2	0	0.292	0	0.908	0.932
ACTB	ESR1	0	0.571	0	0.882	0.947
ACTB	EZR	0.087	0.126	0.900	0.814	0.983
ACTB	GAPDH	0.605	0.230	0	0.925	0.975
ACTB	H3-3B	0.103	0.819	0	0.784	0.962
ACTB	H4C6	0.054	0.867	0.400	0.690	0.973
ACTB	HCLS1	0.083	0.092	0.900	0.446	0.947
ACTB	HSP90AA1	0.142	0.270	0	0.952	0.967
ACTB	HSP90AB1	0.187	0.270	0	0.863	0.911
ACTB	HSPA8	0.333	0.459	0	0.886	0.955
ACTB	IQGAP1	0.101	0.661	0.900	0.587	0.985
ACTB	ITGA2B	0.046	0	0.900	0.395	0.937
ACTB	MSN	0.132	0.141	0.900	0.712	0.975
ACTB	PARVA	0.054	0.488	0.900	0.228	0.957
ACTB	PBRM1	0	0.843	0.800	0.533	0.984
ACTB	PFN1	0.485	0.972	0.900	0.992	0.999
ACTB	PFN3	0.054	0.330	0.900	0.987	0.999
ACTB	PFN4	0.054	0.402	0.900	0.988	0.999
ACTB	PHF10	0	0.842	0.800	0.430	0.980
ACTB	PPARG	0	0.047	0.900	0.722	0.971
ACTB	RHOA	0.426	0.070	0.900	0.646	0.978
ACTB	RUVBL1	0.057	0.800	0.900	0.714	0.993
ACTB	SMARCA4	0.062	0.982	0.650	0.876	0.999
ACTB	SMARCB1	0.080	0.873	0.540	0.628	0.977
ACTB	SMARCC2	0.045	0.899	0.650	0.572	0.983
ACTB	SMARCD1	0.084	0.857	0.800	0.540	0.986
ACTB	SMARCD3	0.084	0.397	0.800	0.229	0.903
ACTB	SMARCE1	0.059	0.925	0.800	0.767	0.996
ACTB	TBP	0.294	0.090	0.500	0.741	0.905
ACTB	TJP1	0.042	0.333	0.900	0.797	0.985
ACTB	TLN1	0.074	0.053	0.900	0.603	0.960
ACTB	TLN2	0.042	0.053	0.900	0.588	0.957
ACTB	TRRAP	0.044	0.299	0.900	0.482	0.960
ACTB	VASP	0.132	0.219	0.900	0.422	0.955
ACTB	VCL	0.100	0.105	0.900	0.826	0.984
ACTB	WAS	0.087	0.284	0.900	0.387	0.954
ACTB	WASL	0.046	0.492	0.900	0.630	0.979
ACTB	YY1	0.056	0.315	0.800	0.432	0.916
ACTB	ZYX	0.143	0.124	0.900	0.319	0.942
ACTG1	ACTB	0.778	0.983	0.900	0.795	0.999
ACTG1	ACTL6A	0.074	0.416	0.800	0.502	0.939
ACTG1	ACTR2	0.131	0.402	0.900	0.150	0.949
ACTG1	ACTR3	0.114	0.298	0.900	0.103	0.936
ACTG1	BAIAP2	0.044	0.195	0.900	0.124	0.923
ACTG1	CASP3	0.049	0.095	0.900	0.209	0.922
ACTG1	CDC42	0.118	0.070	0.900	0.537	0.957
ACTG1	CFL1	0.521	0.840	0.900	0.790	0.998
ACTG1	CTNNA1	0.062	0.050	0.900	0.539	0.953
ACTG1	EZR	0.087	0.054	0.900	0.619	0.962
ACTG1	HCLS1	0.055	0.092	0.900	0.577	0.958
ACTG1	IQGAP1	0.067	0.247	0.900	0.292	0.943
ACTG1	ITGA2B	0.046	0	0.900	0.080	0.904
ACTG1	MSN	0.093	0.054	0.900	0.581	0.959
ACTG1	PARVA	0.063	0	0.900	0.203	0.918
ACTG1	PFN1	0.252	0.301	0.900	0.871	0.992
ACTG1	PFN3	0.054	0.178	0.900	0.862	0.987
ACTG1	PFN4	0.054	0.402	0.900	0.872	0.991
ACTG1	PPARG	0	0.047	0.900	0.098	0.906
ACTG1	RHOA	0.171	0.070	0.900	0.359	0.944
ACTG1	SMARCE1	0.092	0.261	0.800	0.441	0.915
ACTG1	TJP1	0.047	0.045	0.900	0.158	0.913
ACTG1	TLN1	0.056	0.053	0.900	0.767	0.976
ACTG1	TLN2	0.042	0.053	0.900	0.623	0.961
ACTG1	VASP	0.095	0.528	0.900	0.480	0.974
ACTG1	VCL	0.096	0.230	0.900	0.875	0.990
ACTG1	WAS	0.057	0.284	0.900	0.338	0.949
ACTG1	WASL	0.046	0.705	0.900	0.320	0.978
ACTG1	ZYX	0.082	0	0.900	0.309	0.931
ACTL6A	ACTB	0.053	0.939	0.900	0.980	0.999
ACTL6A	ACTG1	0.074	0.416	0.800	0.502	0.939
ACTL6A	ARID1A	0.067	0.966	0.900	0.993	0.999
ACTL6A	ARID1B	0.049	0.686	0.900	0.872	0.995
ACTL6A	ARID2	0.087	0.855	0.800	0.932	0.997
ACTL6A	BRD7	0.138	0.911	0.800	0.943	0.999
ACTL6A	DMAP1	0.118	0.963	0.900	0.930	0.999
ACTL6A	DPF2	0.148	0.829	0.540	0.821	0.986
ACTL6A	EP400	0.047	0.929	0.900	0.936	0.999
ACTL6A	H3-3B	0.080	0.850	0	0.410	0.911
ACTL6A	H4C6	0.056	0.891	0.500	0.461	0.968
ACTL6A	PBRM1	0.131	0.957	0.800	0.957	0.999
ACTL6A	PHF10	0.067	0.930	0.800	0.999	0.999
ACTL6A	PPARG	0	0.047	0.900	0.087	0.905
ACTL6A	RUVBL1	0.383	0.918	0.900	0.989	0.999
ACTL6A	SMARCA2	0.060	0.935	0.900	0.984	0.999
ACTL6A	SMARCA4	0.066	0.995	0.900	0.995	0.999
ACTL6A	SMARCB1	0.180	0.988	0.900	0.995	0.999
ACTL6A	SMARCC1	0.075	0.901	0.900	0.996	0.999
ACTL6A	SMARCC2	0.099	0.979	0.900	0.995	0.999
ACTL6A	SMARCD1	0.138	0.979	0.900	0.991	0.999
ACTL6A	SMARCD2	0.138	0.861	0.900	0.815	0.997
ACTL6A	SMARCD3	0.115	0.796	0.900	0.699	0.993
ACTL6A	SMARCE1	0.067	0.974	0.900	0.995	0.999
ACTL6A	TRRAP	0.045	0.964	0.900	0.974	0.999
ACTL6A	UCHL5	0.124	0.474	0.900	0.097	0.952
ACTL6A	YY1	0.050	0.745	0.900	0.190	0.977
ACTR2	ACTB	0.335	0.525	0.900	0.128	0.968
ACTR2	ACTG1	0.131	0.402	0.900	0.150	0.949
ACTR2	ACTR3	0.855	0.997	0.900	0.984	0.999
ACTR2	CDC42	0.555	0.154	0.500	0.765	0.950
ACTR2	CFL1	0.117	0.532	0	0.919	0.963
ACTR2	CTTN	0.098	0.756	0	0.890	0.973
ACTR2	HCLS1	0.162	0.092	0.900	0.890	0.990
ACTR2	PFN1	0.228	0.299	0	0.863	0.920
ACTR2	PFN4	0.054	0.178	0	0.885	0.903
ACTR2	WAS	0.056	0.861	0.900	0.997	0.999
ACTR2	WASL	0.056	0.985	0.900	0.993	0.999
ACTR2	WIPF1	0.075	0.242	0.500	0.799	0.920
ACTR3	ACTB	0.268	0.443	0.900	0.086	0.957
ACTR3	ACTG1	0.114	0.298	0.900	0.103	0.936
ACTR3	ACTR2	0.855	0.997	0.900	0.984	0.999
ACTR3	CTTN	0.058	0.792	0	0.647	0.925
ACTR3	HCLS1	0.122	0.329	0.900	0.638	0.975
ACTR3	WAS	0.055	0.645	0.900	0.917	0.996
ACTR3	WASL	0	0.962	0.900	0.759	0.999
ADA	DPP4	0.067	0.972	0	0.997	0.999
ADAM17	HBEGF	0.044	0	0.900	0.690	0.967
ADAM17	TMPRSS2	0	0	0	0.936	0.936
ADAM17	TNF	0.044	0	0.750	0.811	0.950
ADIPOR1	ADIPOR2	0.044	0	0.900	0.885	0.988
ADIPOR1	APPL1	0	0.477	0.900	0.996	0.999
ADIPOR2	ADIPOR1	0.044	0	0.900	0.885	0.988
ADIPOR2	APPL1	0	0.326	0.900	0.994	0.999
ADIPOR2	PPARA	0.067	0.045	0	0.897	0.900
ADRB2	ARRB1	0.046	0.108	0.700	0.999	0.999
ADRB2	ARRB2	0.055	0.786	0.700	0.998	0.999
ADRB2	CACNA1C	0	0.095	0	0.933	0.937
ADRB2	GRK2	0.045	0.646	0.500	0.913	0.983
ADRB2	SLC9A3R1	0.055	0.791	0	0.989	0.997
ADRB2	SRC	0.047	0.510	0.500	0.831	0.955
AGER	HMGB1	0	0.603	0.500	0.999	0.999
AGER	HRAS	0.057	0.068	0.900	0.155	0.915
AGER	JAK2	0	0.053	0.900	0.224	0.920
AGER	KRAS	0.057	0.311	0.900	0.250	0.944
AGER	NRAS	0.057	0.068	0.900	0	0.904
AGER	S100A12	0.106	0.410	0.500	0.997	0.999
AGER	S100B	0.050	0.971	0.500	0.995	0.999
AGER	TLR4	0	0	0	0.940	0.940
AGT	ACE	0	0.733	0.750	0.989	0.999
AGT	ACE2	0.042	0.739	0.750	0.989	0.999
AGT	AGTR2	0	0.994	0.900	0.999	0.999
AGT	ARRB2	0	0	0	0.915	0.915
AGT	REN	0.052	0.960	0.750	0.989	0.999
AGTR2	ACE	0.042	0	0	0.948	0.948
AGTR2	ACE2	0.072	0	0	0.952	0.954
AGTR2	AGT	0	0.994	0.900	0.999	0.999
AGTR2	REN	0.057	0	0	0.934	0.935
AHR	AIP	0	0.986	0.800	0.662	0.999
AHR	ARNT	0.109	0.996	0.800	0.495	0.999
AHR	ARNT2	0.109	0.692	0.700	0.359	0.940
AHR	ESR1	0.059	0.833	0	0.450	0.906
AHR	HSP90AA1	0	0.869	0.800	0.717	0.992
AHR	HSP90AB1	0	0.927	0.800	0.736	0.995
AHR	PTGES3	0.043	0.544	0.800	0.077	0.908
AHSA1	CDC37	0.119	0.493	0	0.934	0.968
AHSA1	FKBP4	0.392	0.613	0	0.894	0.973
AHSA1	HSP90AA1	0.477	0.968	0	0.997	0.999
AHSA1	HSP90AB1	0.504	0.938	0	0.995	0.999
AHSA1	HSPA4	0.368	0.125	0	0.952	0.971
AHSA1	HSPA8	0.511	0.533	0	0.717	0.930
AHSA1	PPID	0.722	0.562	0	0.622	0.950
AHSA1	PTGES3	0.713	0.314	0	0.973	0.994
AHSA1	STIP1	0.944	0.259	0	0.967	0.998
AIM2	CASP1	0.157	0.626	0.900	0.999	0.999
AIM2	CASP5	0.180	0	0.900	0.884	0.989
AIM2	DDX58	0.177	0	0	0.933	0.942
AIM2	GSDMD	0.056	0	0.720	0.816	0.947
AIM2	MEFV	0.062	0.044	0.540	0.999	0.999
AIM2	NLRC4	0.087	0	0.720	0.999	0.999
AIM2	NLRP1	0.062	0	0.900	0.998	0.999
AIM2	NLRP3	0.085	0	0.900	0.999	0.999
AIM2	NLRP6	0.073	0	0.900	0.996	0.999
AIM2	PYCARD	0.065	0.839	0.900	0.998	0.999
AIM2	TP53BP1	0	0	0.900	0.666	0.965
AIMP1	AIMP2	0.199	0.916	0.900	0.978	0.999
AIMP1	DARS1	0.363	0.881	0.900	0.386	0.994
AIMP1	EEF1E1	0.180	0.875	0.900	0.972	0.999
AIMP1	EPRS1	0.622	0.976	0.900	0.813	0.999
AIMP1	IARS1	0.209	0.886	0.900	0.664	0.996
AIMP1	KARS1	0.343	0.886	0.900	0.724	0.997
AIMP1	LARS1	0.405	0.874	0.900	0.665	0.997
AIMP1	MARS1	0.287	0.978	0.900	0.733	0.999
AIMP1	QARS1	0.211	0.989	0.900	0.895	0.999
AIMP1	RARS1	0.286	0.991	0.900	0.863	0.999
AIMP1	RARS2	0.230	0.146	0	0.865	0.908
AIMP2	AIMP1	0.199	0.916	0.900	0.978	0.999
AIMP2	DARS1	0.147	0.987	0.900	0.584	0.999
AIMP2	EEF1E1	0.240	0.980	0.900	0.993	0.999
AIMP2	EPRS1	0.151	0.985	0.900	0.934	0.999
AIMP2	IARS1	0.183	0.854	0.900	0.597	0.994
AIMP2	KARS1	0.284	0.994	0.900	0.933	0.999
AIMP2	LARS1	0.083	0.839	0.900	0.757	0.995
AIMP2	MARS1	0.161	0.967	0.900	0.891	0.999
AIMP2	QARS1	0.141	0.911	0.900	0.892	0.999
AIMP2	RARS1	0.328	0.911	0.900	0.729	0.998
AIP	AHR	0	0.986	0.800	0.662	0.999
AIP	HSP90AA1	0.047	0.684	0	0.995	0.998
AIP	HSP90AB1	0.084	0.977	0.800	0.995	0.999
AIP	PTGES3	0.044	0.658	0.800	0.450	0.959
AIP	SRC	0	0.141	0	0.921	0.929
AKAP13	ARHGEF11	0.055	0.074	0.900	0.198	0.920
AKAP13	GNA12	0.053	0.335	0.900	0.630	0.973
AKAP13	RHOA	0.089	0.970	0.900	0.991	0.999
AKT1	ACTB	0.105	0.313	0	0.885	0.923
AKT1	AKT1S1	0.141	0.626	0.900	0.882	0.995
AKT1	APPL1	0.049	0.733	0	0.977	0.993
AKT1	ARHGDIA	0.152	0.045	0	0.982	0.984
AKT1	ARRB1	0.049	0.345	0	0.985	0.990
AKT1	ARRB2	0.075	0.639	0	0.993	0.997
AKT1	AXIN1	0.232	0.127	0	0.880	0.912
AKT1	BCL2L1	0.095	0.292	0.900	0.888	0.991
AKT1	BECN1	0.060	0.610	0	0.795	0.918
AKT1	BRCA1	0	0.735	0.900	0.786	0.993
AKT1	CASP3	0.044	0.311	0	0.923	0.945
AKT1	CASP9	0.085	0.067	0.900	0.887	0.989
AKT1	CAV1	0.074	0.046	0.500	0.875	0.937
AKT1	CCND1	0.088	0	0	0.919	0.923
AKT1	CDC37	0.150	0.743	0.900	0.833	0.995
AKT1	CDC42	0.092	0.110	0	0.999	0.999
AKT1	CDH1	0	0.165	0	0.889	0.903
AKT1	CDKN1A	0	0.776	0.900	0.833	0.995
AKT1	CDKN1B	0.121	0.797	0.900	0.842	0.996
AKT1	CHUK	0.110	0.835	0.900	0.814	0.996
AKT1	CTNNB1	0.074	0.539	0.400	0.930	0.979
AKT1	EGF	0	0	0	0.933	0.933
AKT1	EIF4EBP1	0.043	0.387	0	0.883	0.925
AKT1	EP300	0.066	0.821	0	0.749	0.954
AKT1	ESR1	0.055	0.314	0	0.877	0.913
AKT1	FKBP4	0.060	0.045	0	0.912	0.914
AKT1	FKBP5	0.049	0.626	0	0.906	0.964
AKT1	FOXO1	0	0.881	0.900	0.940	0.999
AKT1	FOXO3	0.103	0.853	0.900	0.928	0.998
AKT1	GAPDH	0.056	0.250	0	0.884	0.911
AKT1	GRB2	0.049	0.100	0	0.900	0.907
AKT1	GSK3B	0.138	0.929	0.900	0.428	0.996
AKT1	HIF1A	0	0.229	0	0.916	0.932
AKT1	HSP90AA1	0.049	0.883	0.900	0.996	0.999
AKT1	HSP90AB1	0.049	0.626	0.900	0.996	0.999
AKT1	HSPA4	0.049	0.331	0	0.948	0.964
AKT1	HSPB1	0.050	0.782	0	0.963	0.991
AKT1	IKBKB	0.152	0.775	0.900	0.570	0.990
AKT1	IKBKG	0.120	0.456	0.900	0.670	0.982
AKT1	IQGAP1	0.049	0.292	0	0.966	0.975
AKT1	IRS1	0.049	0.539	0	0.941	0.972
AKT1	JUN	0.049	0.085	0.900	0.915	0.991
AKT1	KRAS	0.076	0.110	0	0.893	0.904
AKT1	MAP3K5	0.049	0.314	0.900	0.803	0.985
AKT1	MAPK1	0.118	0.110	0.900	0.872	0.988
AKT1	MAPK14	0.246	0.739	0.900	0.535	0.990
AKT1	MAPK3	0.266	0.110	0.900	0.432	0.957
AKT1	MAPKAP1	0.126	0.789	0.400	0.814	0.976
AKT1	MAPKAPK2	0.421	0.682	0	0.652	0.930
AKT1	MDM2	0	0.891	0.900	0.980	0.999
AKT1	MTOR	0.060	0.925	0.900	0.954	0.999
AKT1	NOS3	0	0.786	0.900	0.909	0.997
AKT1	PAK1	0.070	0.715	0	0.981	0.994
AKT1	PDPK1	0.095	0.918	0.900	0.926	0.999
AKT1	PHLPP1	0	0.638	0.900	0.994	0.999
AKT1	PIK3CA	0.060	0.738	0.900	0.951	0.998
AKT1	PIK3CB	0.049	0.334	0.900	0.901	0.992
AKT1	PIK3CD	0.042	0.098	0.900	0.757	0.976
AKT1	PIK3R1	0.058	0.558	0.900	0.913	0.995
AKT1	PIK3R2	0.128	0.093	0.900	0.677	0.971
AKT1	PIK3R3	0.051	0.093	0.900	0.610	0.962
AKT1	PPP2R1A	0.140	0.510	0.650	0.507	0.917
AKT1	PRKCZ	0.042	0.625	0.900	0.368	0.974
AKT1	PTEN	0	0.648	0	0.967	0.988
AKT1	RAF1	0.075	0.816	0.900	0.557	0.992
AKT1	RASA1	0.060	0	0	0.901	0.902
AKT1	RHEB	0.090	0.110	0.400	0.904	0.947
AKT1	RHOA	0.105	0.110	0	0.889	0.904
AKT1	RICTOR	0.044	0.894	0.400	0.883	0.992
AKT1	RPS6KB1	0.090	0.772	0.900	0.211	0.982
AKT1	RPTOR	0.085	0.300	0.900	0.954	0.996
AKT1	SMAD3	0.117	0.618	0	0.989	0.996
AKT1	SRC	0.088	0.601	0.500	0.977	0.995
AKT1	STAT1	0.106	0.096	0.400	0.930	0.961
AKT1	STAT3	0.118	0.096	0.500	0.925	0.966
AKT1	TERT	0.050	0.612	0	0.758	0.903
AKT1	TNF	0.074	0.057	0	0.903	0.907
AKT1	TP53	0.049	0.184	0.900	0.934	0.994
AKT1	VAV1	0.049	0	0	0.948	0.949
AKT1	WAS	0.048	0.088	0	0.973	0.974
AKT1	WASL	0	0.088	0	0.945	0.947
AKT1	XIAP	0.049	0.786	0	0.725	0.939
AKT1S1	AKT1	0.141	0.626	0.900	0.882	0.995
AKT1S1	DEPTOR	0	0	0.800	0.998	0.999
AKT1S1	EIF4EBP1	0.119	0	0.900	0.762	0.977
AKT1S1	MAPKAP1	0.067	0.954	0	0.966	0.998
AKT1S1	MTOR	0.060	0.985	0.900	0.997	0.999
AKT1S1	PPARG	0	0	0.900	0.220	0.918
AKT1S1	RHEB	0	0.071	0.900	0.980	0.997
AKT1S1	RICTOR	0	0	0	0.993	0.993
AKT1S1	RPS6KB1	0.090	0.075	0.900	0.899	0.990
AKT1S1	RPTOR	0.138	0.997	0.900	0.999	0.999
AKT1S1	RRAGA	0	0.800	0.900	0.760	0.994
AKT1S1	RRAGB	0	0	0.900	0.618	0.960
AKT1S1	RRAGC	0.049	0.800	0.900	0.614	0.991
AKT1S1	TTI1	0.050	0	0	0.993	0.993
AKT1S1	ULK1	0.128	0	0.900	0.492	0.951
ALDOA	GAPDH	0.827	0.345	0.938	0.927	0.999
ALDOA	GAPDHS	0.246	0.091	0.938	0.502	0.977
ALDOA	PGK1	0.382	0.381	0.312	0.870	0.962
ALDOA	TPI1	0.515	0.292	0.956	0.867	0.997
ANAPC1	ANAPC10	0.108	0.999	0.900	0.851	0.999
ANAPC1	ANAPC11	0	0.966	0.900	0.773	0.999
ANAPC1	ANAPC16	0	0.990	0.900	0.522	0.999
ANAPC1	ANAPC2	0.067	0.999	0.900	0.872	0.999
ANAPC1	ANAPC4	0.118	0.999	0.900	0.923	0.999
ANAPC1	ANAPC5	0.185	0.999	0.900	0.944	0.999
ANAPC1	ANAPC7	0.221	0.981	0.900	0.746	0.999
ANAPC1	BABAM2	0.081	0	0.900	0	0.904
ANAPC1	BARD1	0.074	0.055	0.900	0.101	0.910
ANAPC1	BRCA1	0.100	0	0.900	0.161	0.917
ANAPC1	BRCC3	0.054	0	0.900	0.069	0.904
ANAPC1	BUB1B	0.100	0.995	0.720	0.451	0.999
ANAPC1	BUB3	0.068	0.781	0.650	0.401	0.951
ANAPC1	CCNA2	0.083	0.807	0.500	0.394	0.939
ANAPC1	CCNB1	0.137	0	0.900	0.286	0.933
ANAPC1	CCNB2	0.137	0	0.900	0.503	0.953
ANAPC1	CDC16	0.212	0.997	0.900	0.937	0.999
ANAPC1	CDC20	0.072	0.999	0.800	0.842	0.999
ANAPC1	CDC23	0.179	0.997	0.900	0.856	0.999
ANAPC1	CDC26	0	0.989	0.900	0.586	0.999
ANAPC1	CDC27	0.142	0.999	0.900	0.919	0.999
ANAPC1	CDK1	0.083	0.429	0.650	0.693	0.936
ANAPC1	FBXO5	0.083	0.960	0	0.198	0.969
ANAPC1	FZR1	0.049	0.988	0.800	0.430	0.998
ANAPC1	MAD2L1	0.103	0.927	0.650	0.682	0.991
ANAPC1	NEK2	0.083	0.897	0.500	0.460	0.971
ANAPC1	UBE2C	0.063	0.818	0.900	0.283	0.986
ANAPC1	UBE2S	0.059	0.865	0.900	0.224	0.988
ANAPC10	ANAPC1	0.108	0.999	0.900	0.851	0.999
ANAPC10	ANAPC11	0	0.997	0.900	0.997	0.999
ANAPC10	ANAPC16	0.044	0.998	0.900	0.865	0.999
ANAPC10	ANAPC2	0.076	0.999	0.900	0.808	0.999
ANAPC10	ANAPC4	0.083	0.999	0.900	0.803	0.999
ANAPC10	ANAPC5	0.208	0.999	0.900	0.977	0.999
ANAPC10	ANAPC7	0.082	0.999	0.900	0.951	0.999
ANAPC10	BABAM2	0.054	0	0.900	0	0.901
ANAPC10	BARD1	0.066	0.053	0.900	0.047	0.904
ANAPC10	BRCA1	0.056	0	0.900	0.113	0.909
ANAPC10	BRCC3	0.091	0	0.900	0	0.905
ANAPC10	BUB1B	0.069	0.999	0.720	0.719	0.999
ANAPC10	CCNA2	0.062	0.900	0.500	0.486	0.972
ANAPC10	CCNB1	0.108	0.994	0.900	0.660	0.999
ANAPC10	CCNB2	0.095	0.126	0.900	0.188	0.927
ANAPC10	CDC16	0.109	0.999	0.900	0.983	0.999
ANAPC10	CDC20	0.042	0.999	0.800	0.967	0.999
ANAPC10	CDC23	0.181	0.998	0.900	0.993	0.999
ANAPC10	CDC26	0.060	0.998	0.900	0.959	0.999
ANAPC10	CDC27	0.115	0.999	0.900	0.982	0.999
ANAPC10	CDK1	0.146	0.108	0.650	0.769	0.930
ANAPC10	FBXO5	0.128	0.967	0	0.545	0.986
ANAPC10	FZR1	0	0.940	0.800	0.798	0.997
ANAPC10	MAD2L1	0.190	0.998	0.650	0.235	0.999
ANAPC10	NEK2	0.056	0.800	0.500	0.553	0.952
ANAPC10	PTTG1	0.064	0	0.650	0.751	0.911
ANAPC10	UBE2C	0.064	0.823	0.900	0.631	0.993
ANAPC10	UBE2D1	0.125	0.153	0.800	0.444	0.906
ANAPC10	UBE2S	0.062	0.823	0.900	0.805	0.996
ANAPC11	ANAPC1	0	0.966	0.900	0.773	0.999
ANAPC11	ANAPC10	0	0.997	0.900	0.997	0.999
ANAPC11	ANAPC16	0.049	0.507	0.900	0.842	0.991
ANAPC11	ANAPC2	0	0.998	0.900	0.910	0.999
ANAPC11	ANAPC4	0.047	0.998	0.900	0.797	0.999
ANAPC11	ANAPC5	0.056	0.966	0.900	0.979	0.999
ANAPC11	ANAPC7	0	0.507	0.900	0.731	0.985
ANAPC11	BABAM2	0	0	0.900	0	0.900
ANAPC11	BARD1	0	0.071	0.900	0.185	0.917
ANAPC11	BRCA1	0.055	0	0.900	0.157	0.913
ANAPC11	BRCC3	0	0.053	0.900	0.108	0.908
ANAPC11	BUB1B	0	0.746	0.720	0.537	0.964
ANAPC11	CDC16	0	0.991	0.900	0.920	0.999
ANAPC11	CDC20	0.120	0.851	0.540	0.989	0.999
ANAPC11	CDC23	0	0.973	0.900	0.979	0.999
ANAPC11	CDC26	0.099	0.507	0.900	0.923	0.996
ANAPC11	CDC27	0.054	0.997	0.900	0.931	0.999
ANAPC11	FZR1	0.060	0.641	0.540	0.715	0.949
ANAPC11	PTTG1	0.072	0.625	0.500	0.595	0.920
ANAPC11	RBX1	0.230	0	0	0.894	0.915
ANAPC11	RNF7	0.164	0	0.360	0.871	0.925
ANAPC11	UBE2C	0.125	0.996	0.900	0.795	0.999
ANAPC11	UBE2D1	0	0.886	0.800	0.688	0.992
ANAPC11	UBE2S	0.115	0.971	0.900	0.888	0.999
ANAPC16	ANAPC1	0	0.990	0.900	0.522	0.999
ANAPC16	ANAPC10	0.044	0.998	0.900	0.865	0.999
ANAPC16	ANAPC11	0.049	0.507	0.900	0.842	0.991
ANAPC16	ANAPC2	0	0.977	0.900	0.271	0.998
ANAPC16	ANAPC4	0.049	0.979	0.900	0.444	0.998
ANAPC16	ANAPC5	0.159	0.975	0.900	0.849	0.999
ANAPC16	ANAPC7	0.049	0.987	0.900	0.669	0.999
ANAPC16	BABAM2	0.042	0	0.900	0	0.900
ANAPC16	BARD1	0	0	0.900	0.072	0.903
ANAPC16	BRCA1	0	0	0.900	0	0.900
ANAPC16	BRCC3	0.096	0	0.900	0	0.905
ANAPC16	BUB1B	0	0.965	0.720	0.307	0.992
ANAPC16	CCNA2	0	0.800	0.500	0.182	0.911
ANAPC16	CDC16	0.072	0.987	0.900	0.960	0.999
ANAPC16	CDC20	0	0.998	0.540	0.639	0.999
ANAPC16	CDC23	0.044	0.978	0.900	0.805	0.999
ANAPC16	CDC26	0.111	0.975	0.900	0.906	0.999
ANAPC16	CDC27	0	0.999	0.900	0.871	0.999
ANAPC16	FBXO5	0	0.951	0	0.399	0.969
ANAPC16	FZR1	0	0.939	0.540	0.446	0.983
ANAPC16	MAD2L1	0	0.822	0.500	0	0.907
ANAPC16	NEK2	0	0.896	0.500	0.257	0.958
ANAPC16	UBE2C	0	0.819	0.900	0.368	0.987
ANAPC16	UBE2S	0	0.819	0.900	0.356	0.987
ANAPC2	ANAPC1	0.067	0.999	0.900	0.872	0.999
ANAPC2	ANAPC10	0.076	0.999	0.900	0.808	0.999
ANAPC2	ANAPC11	0	0.998	0.900	0.910	0.999
ANAPC2	ANAPC16	0	0.977	0.900	0.271	0.998
ANAPC2	ANAPC4	0.124	0.999	0.900	0.907	0.999
ANAPC2	ANAPC5	0.072	0.998	0.900	0.931	0.999
ANAPC2	ANAPC7	0.127	0.998	0.900	0.784	0.999
ANAPC2	BABAM2	0.042	0	0.900	0	0.900
ANAPC2	BARD1	0	0.091	0.900	0.155	0.916
ANAPC2	BRCA1	0	0	0.900	0.157	0.912
ANAPC2	BRCC3	0.047	0	0.900	0.060	0.902
ANAPC2	BUB1B	0.061	0.993	0.720	0.549	0.999
ANAPC2	CCNA2	0	0.800	0.500	0.215	0.914
ANAPC2	CCNB1	0.075	0.128	0.900	0.298	0.935
ANAPC2	CCNB2	0.055	0.128	0.900	0.202	0.925
ANAPC2	CDC16	0.103	0.999	0.900	0.924	0.999
ANAPC2	CDC20	0.075	0.999	0.800	0.817	0.999
ANAPC2	CDC23	0.083	0.999	0.900	0.911	0.999
ANAPC2	CDC26	0	0.998	0.900	0.386	0.999
ANAPC2	CDC27	0.067	0.998	0.900	0.954	0.999
ANAPC2	FBXO5	0	0.986	0	0.222	0.989
ANAPC2	FZR1	0.161	0.998	0.800	0.966	0.999
ANAPC2	MAD2L1	0.058	0.866	0.650	0.395	0.969
ANAPC2	NEK2	0	0.972	0.500	0	0.985
ANAPC2	RPS27A	0.054	0.900	0.500	0.144	0.954
ANAPC2	UBA52	0	0.900	0.500	0.078	0.949
ANAPC2	UBE2C	0.055	0.982	0.900	0.210	0.998
ANAPC2	UBE2S	0.057	0.947	0.900	0.332	0.996
ANAPC4	ANAPC1	0.118	0.999	0.900	0.923	0.999
ANAPC4	ANAPC10	0.083	0.999	0.900	0.803	0.999
ANAPC4	ANAPC11	0.047	0.998	0.900	0.797	0.999
ANAPC4	ANAPC16	0.049	0.979	0.900	0.444	0.998
ANAPC4	ANAPC2	0.124	0.999	0.900	0.907	0.999
ANAPC4	ANAPC5	0.150	0.999	0.900	0.966	0.999
ANAPC4	ANAPC7	0.146	0.998	0.900	0.897	0.999
ANAPC4	BABAM2	0.044	0	0.900	0.042	0.900
ANAPC4	BARD1	0.080	0.125	0.900	0.080	0.916
ANAPC4	BRCA1	0.054	0	0.900	0.126	0.910
ANAPC4	BRCC3	0.145	0	0.900	0	0.910
ANAPC4	BUB1B	0.049	0.999	0.720	0.324	0.999
ANAPC4	BUB3	0.066	0.994	0.650	0.338	0.998
ANAPC4	CCNA2	0	0.998	0.500	0.269	0.999
ANAPC4	CCNB1	0.055	0.994	0.900	0.532	0.999
ANAPC4	CCNB2	0.042	0	0.900	0.536	0.951
ANAPC4	CDC16	0.257	0.998	0.900	0.988	0.999
ANAPC4	CDC20	0.061	0.999	0.800	0.688	0.999
ANAPC4	CDC23	0.252	0.999	0.900	0.962	0.999
ANAPC4	CDC26	0.059	0.984	0.900	0.415	0.999
ANAPC4	CDC27	0.067	0.998	0.900	0.981	0.999
ANAPC4	CDK1	0.044	0.994	0.650	0.241	0.998
ANAPC4	FBXO5	0.055	0.999	0	0.292	0.999
ANAPC4	FZR1	0.069	0.999	0.800	0.530	0.999
ANAPC4	MAD2L1	0.057	0.998	0.650	0.428	0.999
ANAPC4	NEK2	0	0.999	0.500	0.437	0.999
ANAPC4	UBE2C	0.049	0.857	0.900	0.596	0.993
ANAPC4	UBE2S	0.042	0.883	0.900	0.416	0.992
ANAPC5	ANAPC1	0.185	0.999	0.900	0.944	0.999
ANAPC5	ANAPC10	0.208	0.999	0.900	0.977	0.999
ANAPC5	ANAPC11	0.056	0.966	0.900	0.979	0.999
ANAPC5	ANAPC16	0.159	0.975	0.900	0.849	0.999
ANAPC5	ANAPC2	0.072	0.998	0.900	0.931	0.999
ANAPC5	ANAPC4	0.150	0.999	0.900	0.966	0.999
ANAPC5	ANAPC7	0.214	0.998	0.900	0.976	0.999
ANAPC5	BABAM2	0.048	0	0.900	0.309	0.928
ANAPC5	BARD1	0.054	0.055	0.900	0.164	0.915
ANAPC5	BRCA1	0.062	0	0.900	0.130	0.911
ANAPC5	BRCC3	0.055	0	0.900	0.070	0.904
ANAPC5	BUB1B	0.058	0.990	0.720	0.475	0.998
ANAPC5	BUB3	0.102	0.781	0.650	0.606	0.969
ANAPC5	CCNA2	0.044	0.800	0.500	0.316	0.925
ANAPC5	CCNB1	0.095	0.062	0.900	0.339	0.936
ANAPC5	CCNB2	0.086	0.062	0.900	0.203	0.922
ANAPC5	CDC16	0.178	0.997	0.900	0.998	0.999
ANAPC5	CDC20	0.047	0.999	0.800	0.800	0.999
ANAPC5	CDC23	0.246	0.997	0.900	0.999	0.999
ANAPC5	CDC26	0.044	0.969	0.900	0.814	0.999
ANAPC5	CDC27	0.174	0.998	0.900	0.997	0.999
ANAPC5	FBXO5	0.050	0.961	0	0.432	0.977
ANAPC5	FZR1	0	0.999	0.800	0.716	0.999
ANAPC5	MAD2L1	0.107	0.817	0.650	0.236	0.950
ANAPC5	NEK2	0.043	0.878	0.500	0.247	0.950
ANAPC5	UBE2C	0.048	0.821	0.900	0.529	0.990
ANAPC5	UBE2S	0.049	0.867	0.900	0.394	0.991
ANAPC7	ANAPC1	0.221	0.981	0.900	0.746	0.999
ANAPC7	ANAPC10	0.082	0.999	0.900	0.951	0.999
ANAPC7	ANAPC11	0	0.507	0.900	0.731	0.985
ANAPC7	ANAPC16	0.049	0.987	0.900	0.669	0.999
ANAPC7	ANAPC2	0.127	0.998	0.900	0.784	0.999
ANAPC7	ANAPC4	0.146	0.998	0.900	0.897	0.999
ANAPC7	ANAPC5	0.214	0.998	0.900	0.976	0.999
ANAPC7	BABAM2	0.063	0	0.900	0	0.902
ANAPC7	BARD1	0.049	0.063	0.900	0.072	0.906
ANAPC7	BRCA1	0.074	0	0.900	0.072	0.906
ANAPC7	BRCC3	0.099	0	0.900	0.077	0.909
ANAPC7	BUB1B	0.065	0.998	0.720	0.201	0.999
ANAPC7	CCNA2	0.096	0.800	0.500	0.216	0.919
ANAPC7	CCNB1	0.100	0	0.900	0.250	0.926
ANAPC7	CCNB2	0.081	0	0.900	0.162	0.916
ANAPC7	CDC16	0.083	0.984	0.900	0.935	0.999
ANAPC7	CDC20	0.056	0.998	0.800	0.566	0.999
ANAPC7	CDC23	0.255	0.984	0.900	0.933	0.999
ANAPC7	CDC26	0	0.976	0.900	0.431	0.998
ANAPC7	CDC27	0.139	0.999	0.900	0.512	0.999
ANAPC7	FBXO5	0.062	0.921	0	0.102	0.927
ANAPC7	FZR1	0.049	0.998	0.800	0.331	0.999
ANAPC7	MAD2L1	0.084	0.910	0.650	0.340	0.978
ANAPC7	NEK2	0.063	0.897	0.500	0.097	0.951
ANAPC7	UBE2C	0.047	0.818	0.900	0.153	0.983
ANAPC7	UBE2S	0.058	0.865	0.900	0.178	0.988
ANLN	ASPM	0.750	0.292	0	0.480	0.900
ANLN	BUB1	0.791	0	0	0.619	0.917
ANLN	CEP55	0.778	0.292	0	0.592	0.930
ANLN	DLGAP5	0.828	0	0	0.523	0.914
ANLN	KIF11	0.879	0	0	0.582	0.947
ANLN	KIF20A	0.823	0.328	0	0.607	0.949
ANLN	RHOA	0.054	0.959	0.400	0.986	0.999
ANLN	TPX2	0.774	0	0	0.673	0.923
APBB1IP	PFN1	0.061	0.073	0.900	0.942	0.994
APBB1IP	PFN3	0	0.073	0.900	0.951	0.995
APBB1IP	PFN4	0	0.073	0.900	0.951	0.995
APBB1IP	RAP1A	0.060	0.797	0.900	0.867	0.997
APBB1IP	TLN1	0.109	0.904	0.900	0.995	0.999
APBB1IP	TLN2	0.042	0.509	0.900	0.995	0.999
APBB1IP	VASP	0.085	0.145	0.900	0.993	0.999
APC	AXIN1	0.054	0.994	0.900	0.996	0.999
APC	AXIN2	0.054	0.567	0.900	0.993	0.999
APC	BTRC	0.141	0.787	0.800	0.962	0.998
APC	CACYBP	0	0	0.900	0	0.900
APC	CDH1	0	0	0.720	0.726	0.920
APC	CSNK1A1	0.050	0.292	0.800	0.994	0.999
APC	CTBP1	0	0.789	0.800	0.257	0.965
APC	CTNNA1	0.042	0.837	0.720	0.504	0.975
APC	CTNNB1	0.099	0.999	0.900	0.996	0.999
APC	CTNNBIP1	0	0.796	0.720	0.215	0.951
APC	GSK3B	0.095	0.863	0.900	0.996	0.999
APC	SKP1	0.048	0	0.900	0.466	0.944
APC	TCF7	0	0.071	0.900	0.571	0.956
API5	POLR2B	0.999	0	0	0	0.999
APPL1	ADIPOR1	0	0.477	0.900	0.996	0.999
APPL1	ADIPOR2	0	0.326	0.900	0.994	0.999
APPL1	AKT1	0.049	0.733	0	0.977	0.993
APPL1	CASP3	0.044	0.093	0.900	0.225	0.923
APPL1	RAB5A	0.055	0.828	0	0.997	0.999
APPL1	SRC	0.042	0	0	0.974	0.974
AQR	BCAS2	0.049	0.991	0.900	0.222	0.999
AQR	CDC40	0.152	0.996	0.900	0.375	0.999
AQR	CDC5L	0.257	0.996	0.900	0.537	0.999
AQR	CRNKL1	0.149	0.979	0.900	0.725	0.999
AQR	DHX15	0.276	0.863	0	0.354	0.930
AQR	DHX8	0.467	0.964	0.900	0.325	0.998
AQR	PPIL1	0.049	0.976	0.900	0.353	0.998
AQR	PRPF19	0.056	0.997	0.900	0.742	0.999
AQR	RBM22	0.074	0.989	0.900	0.288	0.999
AQR	SF3B1	0.107	0.867	0	0.227	0.900
AQR	SF3B3	0.205	0.800	0	0.427	0.901
AQR	SLU7	0.109	0.937	0	0.350	0.960
AQR	SNRNP200	0.259	0.989	0	0.316	0.994
AQR	SNRNP40	0.082	0.976	0.900	0.083	0.997
AQR	SNRPA1	0.067	0.991	0.900	0.352	0.999
AQR	SNRPB2	0.090	0.964	0.900	0.072	0.996
AQR	SNRPD1	0.056	0.967	0.900	0.248	0.997
AQR	SNRPD2	0.063	0.967	0.900	0	0.996
AQR	SNRPD3	0.058	0.969	0.900	0.159	0.997
AQR	SNRPF	0.066	0.977	0.900	0	0.997
AQR	SYF2	0.049	0.965	0.900	0.152	0.996
AQR	XAB2	0.139	0.997	0.900	0.798	0.999
AR	BRCA1	0	0.612	0	0.773	0.908
AR	BRD4	0	0.585	0	0.929	0.969
AR	CCND1	0.072	0.738	0	0.831	0.955
AR	CREBBP	0.042	0.794	0	0.815	0.960
AR	CTNNB1	0.052	0.888	0	0.968	0.996
AR	EP300	0.043	0.843	0	0.710	0.952
AR	ESR1	0.172	0	0	0.978	0.981
AR	EZH2	0.054	0.635	0	0.941	0.978
AR	FKBP4	0.047	0.338	0.800	0.500	0.928
AR	FKBP5	0.052	0.703	0	0.690	0.905
AR	FOXO1	0	0.516	0	0.843	0.921
AR	HDAC1	0	0.789	0	0.835	0.964
AR	HSP90AA1	0.054	0.901	0.900	0.990	0.999
AR	HSP90AB1	0.054	0.570	0.900	0.990	0.999
AR	HSPA4	0	0.356	0	0.889	0.925
AR	MDM2	0	0.920	0	0.979	0.998
AR	NCOA3	0	0.988	0	0.821	0.997
AR	NCOR1	0.043	0.883	0.500	0.868	0.991
AR	PAK6	0	0.625	0	0.903	0.962
AR	PIAS1	0.055	0.624	0.400	0.688	0.924
AR	PTGES3	0.062	0.510	0.800	0.491	0.946
AR	SMAD3	0	0.626	0	0.879	0.953
AR	SRC	0	0.748	0	0.944	0.985
AR	STAT3	0.048	0.626	0	0.761	0.907
AR	STUB1	0	0.835	0	0.598	0.931
AR	TMPRSS2	0.042	0.785	0	0.886	0.974
AR	TP53	0	0.439	0	0.838	0.905
AR	USP14	0.055	0.785	0	0.572	0.905
ARHGAP1	CDC42	0.047	0.987	0.400	0.997	0.999
ARHGAP1	RASA1	0.049	0	0	0.913	0.914
ARHGAP1	RHOA	0.088	0.986	0.400	0.916	0.999
ARHGDIA	AKT1	0.152	0.045	0	0.982	0.984
ARHGDIA	CDC42	0.117	0.812	0.500	0.996	0.999
ARHGDIA	RAC1	0.093	0.926	0.700	0.773	0.994
ARHGDIA	RHOA	0.174	0.950	0.900	0.997	0.999
ARHGEF11	AKAP13	0.055	0.074	0.900	0.198	0.920
ARHGEF11	ARHGEF12	0.042	0.365	0.900	0.505	0.965
ARHGEF11	GNA12	0.067	0.555	0.900	0.986	0.999
ARHGEF11	RHOA	0.093	0.983	0.900	0.963	0.999
ARHGEF12	ARHGEF11	0.042	0.365	0.900	0.505	0.965
ARHGEF12	ARHGEF7	0.054	0.063	0.900	0.612	0.961
ARHGEF12	GNA12	0.054	0.555	0.900	0.996	0.999
ARHGEF12	HRAS	0	0.134	0.900	0.112	0.916
ARHGEF12	KRAS	0.049	0.134	0.900	0.132	0.919
ARHGEF12	NRAS	0.042	0.134	0.900	0.084	0.913
ARHGEF12	PTK2	0.118	0	0.900	0.268	0.929
ARHGEF12	PTK2B	0.075	0	0.900	0.254	0.925
ARHGEF12	RHOA	0.098	0.983	0.900	0.990	0.999
ARHGEF12	RRAS	0.042	0.134	0.900	0.299	0.934
ARHGEF2	PTK2	0.057	0	0.900	0.512	0.950
ARHGEF2	RHOA	0.092	0.974	0.900	0.936	0.999
ARHGEF7	ARHGEF12	0.054	0.063	0.900	0.612	0.961
ARHGEF7	CBL	0.049	0.786	0.500	0.906	0.989
ARHGEF7	CDC42	0.088	0.722	0.900	0.986	0.999
ARHGEF7	GIT1	0.139	0.926	0.900	0.997	0.999
ARHGEF7	GIT2	0.058	0.895	0.400	0.980	0.998
ARHGEF7	PAK1	0.042	0.929	0.900	0.446	0.995
ARHGEF7	PAK2	0.074	0.983	0.900	0.488	0.999
ARHGEF7	PAK4	0.044	0.113	0.900	0.627	0.964
ARHGEF7	PAK6	0	0.113	0.900	0.607	0.962
ARHGEF7	PIK3CA	0.064	0.062	0	0.912	0.916
ARHGEF7	PIK3CB	0.050	0.062	0	0.962	0.963
ARHGEF7	PIK3CD	0.044	0.062	0	0.954	0.955
ARHGEF7	PXN	0.047	0.575	0	0.937	0.972
ARHGEF7	RAC1	0.110	0.803	0.700	0.281	0.957
ARHGEF7	RELA	0.049	0	0	0.953	0.953
ARHGEF7	SRC	0.060	0	0.900	0.913	0.991
ARID1A	ACTB	0.064	0.883	0.800	0.825	0.995
ARID1A	ACTL6A	0.067	0.966	0.900	0.993	0.999
ARID1A	ARID1B	0.437	0.846	0.900	0.983	0.999
ARID1A	ARID2	0.168	0.324	0.720	0.989	0.998
ARID1A	BRD7	0.060	0.287	0	0.962	0.972
ARID1A	DPF2	0.100	0.990	0.540	0.989	0.999
ARID1A	H4C6	0.058	0.897	0.500	0.160	0.954
ARID1A	MSH2	0.181	0	0	0.970	0.974
ARID1A	PBRM1	0.183	0.556	0.720	0.997	0.999
ARID1A	PHF10	0	0.713	0.800	0.871	0.991
ARID1A	PIK3CA	0.067	0	0	0.911	0.913
ARID1A	PPARG	0	0.076	0.900	0.153	0.914
ARID1A	PPP2R1A	0.074	0	0	0.911	0.914
ARID1A	SMARCA2	0.105	0.948	0.900	0.995	0.999
ARID1A	SMARCA4	0.250	0.998	0.900	0.996	0.999
ARID1A	SMARCB1	0.076	0.991	0.900	0.996	0.999
ARID1A	SMARCC1	0.271	0.940	0.900	0.995	0.999
ARID1A	SMARCC2	0.108	0.993	0.900	0.994	0.999
ARID1A	SMARCD1	0.141	0.992	0.900	0.994	0.999
ARID1A	SMARCD2	0.082	0.910	0.900	0.748	0.997
ARID1A	SMARCD3	0	0.897	0.900	0.961	0.999
ARID1A	SMARCE1	0.097	0.991	0.900	0.995	0.999
ARID1A	TP53	0.067	0.292	0	0.945	0.961
ARID1B	ACTB	0.049	0.218	0.800	0.691	0.947
ARID1B	ACTL6A	0.049	0.686	0.900	0.872	0.995
ARID1B	ARID1A	0.437	0.846	0.900	0.983	0.999
ARID1B	ARID2	0.267	0.324	0.720	0.984	0.997
ARID1B	BRD7	0.049	0.287	0	0.936	0.952
ARID1B	DPF2	0.049	0.898	0.540	0.989	0.999
ARID1B	PBRM1	0.253	0.359	0.720	0.993	0.998
ARID1B	PHF10	0.056	0.296	0.800	0.800	0.969
ARID1B	PPARG	0	0.076	0.900	0.073	0.906
ARID1B	SMARCA2	0.100	0.899	0.900	0.980	0.999
ARID1B	SMARCA4	0.105	0.944	0.900	0.996	0.999
ARID1B	SMARCB1	0.049	0.921	0.900	0.995	0.999
ARID1B	SMARCC1	0.067	0.918	0.900	0.965	0.999
ARID1B	SMARCC2	0.100	0.927	0.900	0.956	0.999
ARID1B	SMARCD1	0.049	0.935	0.900	0.788	0.998
ARID1B	SMARCD2	0.047	0.844	0.900	0.742	0.995
ARID1B	SMARCD3	0	0.781	0.900	0.731	0.993
ARID1B	SMARCE1	0.060	0.927	0.900	0.968	0.999
ARID2	ACTB	0	0.806	0.800	0.610	0.983
ARID2	ACTL6A	0.087	0.855	0.800	0.932	0.997
ARID2	ARID1A	0.168	0.324	0.720	0.989	0.998
ARID2	ARID1B	0.267	0.324	0.720	0.984	0.997
ARID2	BRD7	0.117	0.983	0.800	0.997	0.999
ARID2	DPF2	0.064	0.340	0.540	0.928	0.977
ARID2	H4C6	0.049	0.852	0.500	0.145	0.931
ARID2	PBRM1	0.643	0.985	0.800	0.999	0.999
ARID2	PHF10	0.061	0.937	0.800	0.995	0.999
ARID2	SMARCA2	0.133	0.711	0.720	0.925	0.994
ARID2	SMARCA4	0.156	0.986	0.720	0.996	0.999
ARID2	SMARCB1	0.058	0.982	0.720	0.995	0.999
ARID2	SMARCC1	0.126	0.660	0.720	0.963	0.996
ARID2	SMARCC2	0.106	0.983	0.720	0.944	0.999
ARID2	SMARCD1	0.109	0.984	0.800	0.811	0.999
ARID2	SMARCD2	0.113	0.322	0.800	0.740	0.964
ARID2	SMARCD3	0.101	0.356	0.800	0.725	0.963
ARID2	SMARCE1	0.114	0.974	0.800	0.991	0.999
ARNT	AHR	0.109	0.996	0.800	0.495	0.999
ARNT	ARNT2	0	0	0.900	0.690	0.968
ARNT	CREBBP	0.107	0.095	0.800	0.829	0.968
ARNT	EGLN1	0.060	0.292	0	0.922	0.943
ARNT	EGLN3	0	0	0	0.929	0.929
ARNT	EP300	0.147	0.535	0.800	0.992	0.999
ARNT	EPAS1	0.062	0.994	0.900	0.990	0.999
ARNT	HIF1A	0.093	0.999	0.900	0.990	0.999
ARNT	HIF3A	0.077	0.792	0.500	0.990	0.999
ARNT	VHL	0.109	0.225	0	0.901	0.925
ARNT2	AHR	0.109	0.692	0.700	0.359	0.940
ARNT2	ARNT	0	0	0.900	0.690	0.968
ARNT2	EPAS1	0.064	0.704	0.900	0.952	0.998
ARNT2	HIF1A	0.086	0.694	0.900	0.984	0.999
ARNT2	HIF3A	0.077	0.464	0	0.957	0.977
ARRB1	ADRB2	0.046	0.108	0.700	0.999	0.999
ARRB1	AKT1	0.049	0.345	0	0.985	0.990
ARRB1	ARRB2	0.092	0.781	0.900	0.416	0.986
ARRB1	BRAF	0	0.091	0.900	0.181	0.919
ARRB1	CCR5	0.079	0.341	0.650	0.737	0.936
ARRB1	CXCR2	0.081	0.341	0.650	0.806	0.953
ARRB1	GRK2	0.074	0.475	0.800	0.981	0.998
ARRB1	MAP3K5	0.054	0.625	0	0.772	0.912
ARRB1	MAPK1	0.066	0.292	0.900	0.856	0.989
ARRB1	MAPK3	0.093	0.292	0.900	0.883	0.991
ARRB1	MDM2	0.054	0.850	0	0.935	0.990
ARRB1	NFKBIA	0.108	0.632	0	0.822	0.936
ARRB1	RAF1	0.057	0.091	0.900	0.574	0.958
ARRB1	SMO	0	0.353	0.900	0.916	0.994
ARRB1	SRC	0.101	0.726	0.400	0.995	0.999
ARRB2	ACKR3	0	0.797	0	0.848	0.967
ARRB2	ADRB2	0.055	0.786	0.700	0.998	0.999
ARRB2	AGT	0	0	0	0.915	0.915
ARRB2	AKT1	0.075	0.639	0	0.993	0.997
ARRB2	ARRB1	0.092	0.781	0.900	0.416	0.986
ARRB2	BRAF	0	0.091	0.900	0.590	0.959
ARRB2	GRK2	0.118	0.471	0.800	0.990	0.999
ARRB2	MAP2K1	0.049	0.314	0.500	0.934	0.975
ARRB2	MAP3K5	0.056	0.609	0	0.969	0.987
ARRB2	MAPK1	0.079	0.681	0.900	0.577	0.985
ARRB2	MAPK3	0.074	0.677	0.900	0.892	0.996
ARRB2	MDM2	0.054	0.891	0	0.890	0.987
ARRB2	NFKBIA	0.117	0.520	0	0.970	0.986
ARRB2	RAF1	0.060	0.328	0.900	0.571	0.969
ARRB2	SMO	0	0.353	0.900	0.959	0.997
ARRB2	SRC	0.074	0.740	0.400	0.989	0.998
ARRB2	TAB1	0.049	0.408	0	0.979	0.987
ASPM	ANLN	0.750	0.292	0	0.480	0.900
ASPM	AURKA	0.705	0.314	0	0.685	0.930
ASPM	BUB1	0.907	0.111	0	0.741	0.976
ASPM	BUB1B	0.928	0.111	0	0.628	0.974
ASPM	CCNA2	0.865	0	0	0.603	0.944
ASPM	CCNB1	0.838	0	0	0.714	0.952
ASPM	CCNB2	0.840	0	0	0.709	0.951
ASPM	CDC20	0.900	0.111	0	0.715	0.972
ASPM	CDCA8	0.908	0	0	0.480	0.950
ASPM	CDK1	0.827	0	0	0.682	0.942
ASPM	CENPE	0.954	0.078	0	0.589	0.981
ASPM	CENPF	0.938	0	0	0.802	0.987
ASPM	CEP55	0.842	0	0	0.700	0.950
ASPM	DLGAP5	0.974	0	0	0.799	0.994
ASPM	HMMR	0.809	0.043	0	0.640	0.928
ASPM	KIF11	0.962	0.079	0	0.714	0.989
ASPM	KIF20A	0.900	0.048	0	0.765	0.975
ASPM	KIF2C	0.851	0	0	0.589	0.936
ASPM	KIF4A	0.900	0	0	0.536	0.952
ASPM	NCAPG	0.910	0	0	0.702	0.972
ASPM	NDC80	0.959	0.160	0	0.170	0.969
ASPM	NEK2	0.837	0	0	0.507	0.916
ASPM	NUF2	0.944	0	0	0.665	0.980
ASPM	NUSAP1	0.852	0	0	0.611	0.940
ASPM	PBK	0.841	0.046	0	0.703	0.951
ASPM	PRC1	0.838	0	0	0.532	0.921
ASPM	TOP2A	0.983	0	0	0.804	0.996
ASPM	TPX2	0.827	0	0	0.717	0.949
ASPM	TTK	0.912	0	0	0.530	0.957
ASPM	UBE2C	0.835	0	0	0.673	0.943
ATF2	CREBBP	0.094	0.820	0.800	0.795	0.992
ATF2	EP300	0.119	0.516	0.800	0.757	0.976
ATF2	FOS	0	0.881	0.500	0.853	0.990
ATF2	JUN	0.061	0.993	0.900	0.989	0.999
ATF2	MAPK1	0.116	0.811	0.650	0.596	0.973
ATF2	MAPK14	0.088	0.963	0.900	0.522	0.998
ATF2	MAPK3	0.074	0.579	0.650	0.377	0.903
ATF2	MAPK8	0.102	0.992	0.400	0.722	0.998
ATF2	MAPK9	0.043	0.846	0.400	0.722	0.972
ATF3	FOS	0.470	0.353	0	0.984	0.994
ATF3	FOSB	0.460	0	0	0.895	0.941
ATF3	HDAC1	0.054	0.650	0	0.772	0.918
ATF3	JUN	0.550	0.931	0	0.995	0.999
ATF3	JUNB	0.404	0.774	0	0.754	0.964
ATF3	JUND	0.153	0.684	0	0.980	0.994
ATF3	MDM2	0	0.823	0	0.687	0.942
ATF3	SMAD3	0.044	0.510	0	0.976	0.988
ATF3	SMARCA4	0.067	0.522	0	0.810	0.908
ATF3	TP53	0.053	0.743	0	0.933	0.982
ATG14	ATG5	0.056	0	0.500	0.923	0.960
ATG14	BECN1	0.060	0.994	0.900	0.999	0.999
ATG14	NRBF2	0.047	0.994	0.900	0.994	0.999
ATG14	PIK3C3	0.061	0.994	0.800	0.999	0.999
ATG14	PIK3R4	0.049	0.994	0.800	0.999	0.999
ATG14	ULK1	0.044	0.994	0.900	0.904	0.999
ATG14	UVRAG	0.106	0.088	0.540	0.999	0.999
ATG5	ATG14	0.056	0	0.500	0.923	0.960
ATG5	BCL2L1	0.064	0.292	0	0.989	0.992
ATG5	BECN1	0.060	0.096	0.500	0.971	0.986
ATG5	CASP8	0.087	0.235	0	0.967	0.975
ATG5	DDX58	0.049	0.292	0.900	0.990	0.999
ATG5	FADD	0.056	0.388	0	0.991	0.994
ATG5	PIK3C3	0.056	0.087	0.500	0.944	0.972
ATG5	PIK3R4	0.049	0	0.500	0.893	0.944
ATG5	SIRT1	0.082	0.301	0	0.990	0.993
ATG5	TUFM	0.047	0	0	0.941	0.941
ATG5	ULK1	0	0.893	0	0.974	0.997
ATM	ABL1	0	0.820	0.750	0.774	0.988
ATM	ATR	0.213	0.974	0.900	0.745	0.999
ATM	ATRIP	0.042	0.292	0.500	0.995	0.998
ATM	BARD1	0.044	0.070	0.500	0.892	0.946
ATM	BRCA1	0.042	0.847	0.900	0.999	0.999
ATM	BRCA2	0.048	0.313	0.800	0.971	0.995
ATM	BRIP1	0.042	0	0.800	0.678	0.933
ATM	CASP8	0.197	0	0.900	0.560	0.961
ATM	CDK2	0.042	0.054	0.800	0.834	0.966
ATM	CDK4	0	0.054	0.800	0.696	0.937
ATM	CHEK2	0.044	0.836	0.500	0.999	0.999
ATM	EP300	0.074	0	0	0.900	0.904
ATM	EXO1	0.042	0.492	0.500	0.867	0.963
ATM	FANCD2	0.044	0.321	0.540	0.967	0.989
ATM	HDAC1	0.076	0.331	0	0.923	0.948
ATM	IKBKG	0.042	0.820	0	0.948	0.990
ATM	MDC1	0.073	0.876	0.500	0.996	0.999
ATM	MDM2	0.092	0.621	0.750	0.955	0.995
ATM	MDM4	0.162	0	0.750	0.801	0.954
ATM	MLH1	0.055	0.287	0.540	0.991	0.997
ATM	MRE11	0.236	0.907	0.900	0.941	0.999
ATM	MSH2	0.066	0.324	0.900	0.994	0.999
ATM	MSH3	0.090	0.091	0.720	0.765	0.938
ATM	MSH6	0.073	0.324	0.900	0.993	0.999
ATM	NBN	0.049	0.989	0.900	0.935	0.999
ATM	PALB2	0	0	0.540	0.886	0.945
ATM	RAD23B	0.066	0	0.900	0.425	0.941
ATM	RAD50	0.105	0.730	0.900	0.635	0.990
ATM	RCOR1	0.042	0	0.900	0.175	0.914
ATM	RNF168	0	0	0.500	0.821	0.906
ATM	RNF8	0	0.191	0.500	0.833	0.926
ATM	RPA1	0.047	0.660	0.500	0.611	0.928
ATM	TELO2	0.042	0.809	0	0.808	0.961
ATM	TOPBP1	0.096	0.534	0.500	0.810	0.954
ATM	TP53	0.103	0.928	0.900	0.975	0.999
ATM	TP53BP1	0.042	0.874	0.500	0.995	0.999
ATR	ATM	0.213	0.974	0.900	0.745	0.999
ATR	ATRIP	0.082	0.991	0.900	0.998	0.999
ATR	BRCA1	0.106	0.838	0.900	0.812	0.996
ATR	CHEK2	0.049	0.970	0	0.955	0.998
ATR	EXO1	0.076	0.522	0.500	0.791	0.947
ATR	FANCD2	0.102	0.621	0.500	0.639	0.930
ATR	MRE11	0.131	0.830	0.500	0.626	0.968
ATR	MSH2	0.292	0.775	0	0.481	0.910
ATR	NBN	0.095	0.724	0.500	0.749	0.964
ATR	RAD50	0.171	0.508	0.500	0.590	0.905
ATR	RPA1	0.049	0.925	0.500	0.594	0.983
ATR	TELO2	0.058	0.863	0.900	0.303	0.989
ATR	TOPBP1	0.127	0.934	0.500	0.906	0.996
ATR	TP53	0	0.838	0.900	0.781	0.996
ATR	TP53BP1	0.055	0.884	0	0.792	0.975
ATRIP	ATM	0.042	0.292	0.500	0.995	0.998
ATRIP	ATR	0.082	0.991	0.900	0.998	0.999
ATRIP	BRCA1	0.074	0.777	0.500	0.761	0.972
ATRIP	MCM7	0.074	0.510	0.500	0.916	0.978
ATRIP	RPA1	0.049	0.893	0.500	0.983	0.999
ATRIP	TOPBP1	0.062	0.710	0.500	0.998	0.999
ATRX	DAXX	0.047	0.991	0.900	0.998	0.999
ATRX	EZH2	0.060	0.551	0	0.854	0.933
ATRX	H3-3B	0.054	0.984	0.500	0.981	0.999
ATRX	TP53	0	0.510	0	0.962	0.981
AURKA	ASPM	0.705	0.314	0	0.685	0.930
AURKA	AURKB	0.573	0.421	0.540	0.387	0.922
AURKA	BIRC5	0.824	0.492	0.540	0.865	0.993
AURKA	BRCA1	0.298	0.292	0	0.892	0.942
AURKA	BUB1	0.836	0.089	0	0.822	0.971
AURKA	BUB1B	0.723	0.089	0	0.722	0.924
AURKA	CCNA2	0.853	0	0	0.669	0.949
AURKA	CCNB1	0.863	0.094	0	0.845	0.979
AURKA	CCNB2	0.860	0.637	0	0.799	0.988
AURKA	CDC20	0.902	0.513	0.500	0.817	0.995
AURKA	CDCA8	0.728	0.086	0.540	0.633	0.952
AURKA	CDK1	0.777	0.525	0	0.537	0.951
AURKA	CENPF	0.679	0	0	0.708	0.902
AURKA	CEP55	0.802	0.161	0	0.650	0.936
AURKA	DLGAP5	0.843	0.226	0	0.746	0.966
AURKA	FN1	0.056	0.900	0	0.467	0.945
AURKA	FZR1	0.322	0.615	0.500	0.379	0.908
AURKA	GADD45A	0	0.510	0.900	0.270	0.961
AURKA	HDAC6	0	0.510	0	0.891	0.944
AURKA	HMMR	0.794	0.292	0	0.811	0.970
AURKA	INCENP	0.458	0.860	0.540	0.855	0.994
AURKA	KIF11	0.812	0.272	0	0.816	0.972
AURKA	KIF20A	0.833	0.084	0	0.616	0.936
AURKA	KIF2C	0.799	0.323	0	0.833	0.975
AURKA	MAD2L1	0.647	0.100	0	0.796	0.929
AURKA	NCAPG	0.816	0.103	0	0.735	0.952
AURKA	NDC80	0.720	0.474	0	0.584	0.933
AURKA	PLK1	0.902	0.690	0.500	0.840	0.997
AURKA	PRC1	0.823	0.075	0	0.498	0.910
AURKA	PTTG1	0.680	0.329	0.500	0.730	0.967
AURKA	TOP2A	0.826	0.071	0	0.791	0.963
AURKA	TP53	0.116	0.810	0.750	0.978	0.998
AURKA	TPX2	0.846	0.988	0.900	0.995	0.999
AURKA	UBE2C	0.835	0.300	0.400	0.828	0.986
AURKB	AURKA	0.573	0.421	0.540	0.387	0.922
AURKB	BIRC5	0.764	0.944	0.800	0.996	0.999
AURKB	BUB1	0.827	0.089	0	0.984	0.997
AURKB	BUB1B	0.637	0.327	0.500	0.992	0.999
AURKB	BUB3	0.192	0.124	0.500	0.859	0.943
AURKB	CCNA2	0.960	0	0	0.807	0.991
AURKB	CCNB1	0.587	0.094	0.400	0.851	0.962
AURKB	CCNB2	0.844	0.094	0.400	0.901	0.990
AURKB	CDC20	0.889	0.297	0.500	0.965	0.998
AURKB	CDCA8	0.779	0.897	0.800	0.998	0.999
AURKB	CDK1	0.950	0.331	0.400	0.856	0.997
AURKB	CENPE	0.534	0.100	0	0.946	0.975
AURKB	CENPF	0.559	0	0	0.838	0.925
AURKB	DLGAP5	0.737	0	0	0.818	0.950
AURKB	ESPL1	0.608	0	0.500	0.932	0.985
AURKB	H3-3B	0.115	0.149	0	0.881	0.902
AURKB	INCENP	0.469	0.996	0.800	0.999	0.999
AURKB	KIF11	0.768	0.272	0	0.804	0.964
AURKB	KIF20A	0.835	0.637	0	0.846	0.990
AURKB	KIF2C	0.830	0.323	0	0.975	0.996
AURKB	KIF4A	0.773	0	0	0.756	0.942
AURKB	KNL1	0.311	0.063	0	0.881	0.916
AURKB	MAD2L1	0.603	0.071	0.500	0.669	0.930
AURKB	NCAPG	0.711	0.075	0	0.700	0.913
AURKB	NCAPH	0.573	0.443	0	0.650	0.909
AURKB	NDC80	0.746	0.474	0	0.856	0.979
AURKB	NUF2	0.606	0.292	0	0.835	0.950
AURKB	NUSAP1	0.817	0	0	0.525	0.909
AURKB	PLK1	0.789	0.212	0.500	0.351	0.939
AURKB	PTTG1	0.608	0	0.500	0.760	0.949
AURKB	TOP2A	0.831	0.314	0	0.761	0.970
AURKB	TP53	0.129	0.510	0.500	0.621	0.908
AURKB	TPX2	0.687	0.297	0	0.750	0.940
AURKB	UBE2C	0.766	0.053	0.400	0.704	0.955
AURKB	ZWINT	0.435	0	0	0.877	0.927
AXIN1	AKT1	0.232	0.127	0	0.880	0.912
AXIN1	APC	0.054	0.994	0.900	0.996	0.999
AXIN1	AXIN2	0	0.503	0.900	0.984	0.999
AXIN1	BTRC	0.067	0.843	0.500	0.996	0.999
AXIN1	CACYBP	0	0	0.900	0.091	0.905
AXIN1	CSNK1A1	0	0.718	0.800	0.997	0.999
AXIN1	CTNNB1	0.057	0.982	0.900	0.999	0.999
AXIN1	GSK3B	0.093	0.996	0.900	0.999	0.999
AXIN1	HNF4A	0	0	0	0.926	0.926
AXIN1	LEF1	0.051	0.106	0.650	0.880	0.959
AXIN1	TCF7	0.086	0.106	0.900	0.728	0.974
AXIN1	TP53	0.049	0.639	0	0.746	0.905
AXIN2	APC	0.054	0.567	0.900	0.993	0.999
AXIN2	AXIN1	0	0.503	0.900	0.984	0.999
AXIN2	BTRC	0.049	0.152	0	0.926	0.935
AXIN2	CSNK1A1	0	0.138	0.540	0.994	0.997
AXIN2	CTNNB1	0.057	0.869	0.900	0.993	0.999
AXIN2	GSK3B	0.060	0.921	0.900	0.996	0.999
AXIN2	LEF1	0.159	0.106	0.650	0.879	0.964
AXIN2	TCF7	0.128	0.106	0.900	0.813	0.983
AXIN2	TCF7L1	0.051	0.106	0.650	0.721	0.906
BABAM1	ABRAXAS1	0	0.994	0.900	0.997	0.999
BABAM1	BABAM2	0.067	0.999	0.900	0.998	0.999
BABAM1	BARD1	0	0.063	0.900	0.986	0.998
BABAM1	BRCA1	0	0.994	0.900	0.992	0.999
BABAM1	BRCC3	0.128	0.998	0.900	0.998	0.999
BABAM2	ABRAXAS1	0	0.994	0.900	0.997	0.999
BABAM2	ANAPC1	0.081	0	0.900	0	0.904
BABAM2	ANAPC10	0.054	0	0.900	0	0.901
BABAM2	ANAPC11	0	0	0.900	0	0.900
BABAM2	ANAPC16	0.042	0	0.900	0	0.900
BABAM2	ANAPC2	0.042	0	0.900	0	0.900
BABAM2	ANAPC4	0.044	0	0.900	0.042	0.900
BABAM2	ANAPC5	0.048	0	0.900	0.309	0.928
BABAM2	ANAPC7	0.063	0	0.900	0	0.902
BABAM2	BABAM1	0.067	0.999	0.900	0.998	0.999
BABAM2	BARD1	0.064	0.334	0.900	0.995	0.999
BABAM2	BRCA1	0	0.783	0.900	0.995	0.999
BABAM2	BRCA2	0	0.566	0.720	0.704	0.960
BABAM2	BRCC3	0.128	0.999	0.900	0.998	0.999
BABAM2	CDC16	0.045	0.059	0.900	0.044	0.902
BABAM2	CDC23	0.049	0.045	0.900	0	0.901
BABAM2	CDC26	0	0	0.900	0	0.900
BABAM2	CDC27	0.044	0.099	0.900	0.044	0.906
BABAM2	UBE2C	0.055	0.075	0.900	0.047	0.905
BABAM2	UBE2S	0.055	0.075	0.900	0.082	0.909
BAG1	BAG2	0	0	0.900	0.978	0.997
BAG1	BAG3	0	0.226	0.400	0.935	0.967
BAG1	DNAJB1	0	0.366	0	0.987	0.991
BAG1	HSPA4	0.049	0.882	0.400	0.997	0.999
BAG1	HSPA8	0	0.994	0.400	0.998	0.999
BAG1	HSPBP1	0.050	0	0.900	0.740	0.973
BAG1	RAF1	0.067	0.515	0	0.876	0.939
BAG1	STUB1	0.053	0.836	0	0.785	0.963
BAG2	BAG1	0	0	0.900	0.978	0.997
BAG2	BAG3	0.075	0.292	0.540	0.934	0.977
BAG2	HSPA4	0.121	0.650	0.400	0.989	0.997
BAG2	HSPA8	0.065	0.987	0.540	0.997	0.999
BAG2	HSPBP1	0.044	0	0.900	0.599	0.958
BAG2	SGTA	0.049	0.163	0	0.921	0.931
BAG2	STUB1	0.049	0.777	0.540	0.976	0.997
BAG3	BAG1	0	0.226	0.400	0.935	0.967
BAG3	BAG2	0.075	0.292	0.540	0.934	0.977
BAG3	HSP90AB1	0.153	0.385	0.720	0.758	0.960
BAG3	HSPA4	0.073	0.875	0.400	0.997	0.999
BAG3	HSPA8	0.122	0.867	0.540	0.997	0.999
BAG3	HSPB1	0.291	0.785	0	0.882	0.980
BAG3	HSPB8	0.182	0.841	0.720	0.996	0.999
BAG3	STUB1	0.067	0.775	0.540	0.991	0.999
BAIAP2	ACTB	0.042	0.461	0.900	0.166	0.951
BAIAP2	ACTG1	0.044	0.195	0.900	0.124	0.923
BAIAP2	CDC42	0.059	0.903	0.400	0.996	0.999
BAIAP2	RAC1	0.087	0.849	0.500	0.549	0.964
BAIAP2	VASP	0.042	0.631	0	0.966	0.986
BAIAP2	WAS	0.042	0	0.400	0.906	0.941
BAIAP2	WASL	0.049	0.231	0.400	0.929	0.965
BARD1	ABRAXAS1	0.042	0.994	0.900	0.993	0.999
BARD1	ANAPC1	0.074	0.055	0.900	0.101	0.910
BARD1	ANAPC10	0.066	0.053	0.900	0.047	0.904
BARD1	ANAPC11	0	0.071	0.900	0.185	0.917
BARD1	ANAPC16	0	0	0.900	0.072	0.903
BARD1	ANAPC2	0	0.091	0.900	0.155	0.916
BARD1	ANAPC4	0.080	0.125	0.900	0.080	0.916
BARD1	ANAPC5	0.054	0.055	0.900	0.164	0.915
BARD1	ANAPC7	0.049	0.063	0.900	0.072	0.906
BARD1	ATM	0.044	0.070	0.500	0.892	0.946
BARD1	BABAM1	0	0.063	0.900	0.986	0.998
BARD1	BABAM2	0.064	0.334	0.900	0.995	0.999
BARD1	BRCA1	0.201	0.999	0.900	0.993	0.999
BARD1	BRCA2	0.188	0.793	0.720	0.995	0.999
BARD1	BRCC3	0.062	0.647	0.900	0.994	0.999
BARD1	BRIP1	0.112	0.994	0.540	0.753	0.999
BARD1	CDC16	0.084	0.091	0.900	0.162	0.920
BARD1	CDC23	0.072	0.096	0.900	0.090	0.913
BARD1	CDC26	0	0	0.900	0.109	0.907
BARD1	CDC27	0.059	0.106	0.900	0.106	0.914
BARD1	CHEK2	0.128	0.072	0.500	0.863	0.937
BARD1	H4C6	0.044	0.930	0.500	0.519	0.981
BARD1	MDC1	0.104	0.618	0.500	0.767	0.954
BARD1	MRE11	0.127	0.994	0.540	0.753	0.999
BARD1	MSH6	0.148	0.526	0	0.829	0.925
BARD1	NBN	0.058	0.994	0.540	0.599	0.998
BARD1	PALB2	0.085	0.291	0.500	0.966	0.987
BARD1	RAD50	0.050	0.994	0.540	0.323	0.997
BARD1	RNF8	0.088	0.292	0.500	0.749	0.908
BARD1	RPS27A	0	0.906	0.500	0.087	0.953
BARD1	TOPBP1	0.121	0.994	0.540	0.522	0.998
BARD1	TP53	0	0.745	0.500	0.875	0.982
BARD1	UBA52	0	0.903	0.500	0.121	0.953
BARD1	UBE2C	0.169	0.108	0.900	0.248	0.936
BARD1	UBE2D1	0.055	0.832	0	0.729	0.953
BARD1	UBE2S	0.057	0.108	0.900	0.598	0.961
BCAR1	CBL	0.050	0.292	0	0.899	0.926
BCAR1	CRK	0.064	0.928	0.900	0.998	0.999
BCAR1	CRKL	0.042	0.749	0.900	0.968	0.999
BCAR1	ESR1	0	0.513	0	0.885	0.941
BCAR1	FYN	0.073	0.786	0	0.882	0.974
BCAR1	GRB2	0.042	0.627	0	0.955	0.982
BCAR1	PTK2	0.084	0.880	0.900	0.997	0.999
BCAR1	PTK2B	0	0.736	0.900	0.950	0.998
BCAR1	PTPN12	0.044	0.742	0	0.861	0.962
BCAR1	PXN	0.049	0.717	0.500	0.998	0.999
BCAR1	RAPGEF1	0.063	0.292	0.800	0.981	0.997
BCAR1	SRC	0.102	0.884	0.900	0.998	0.999
BCAR1	TLN1	0	0.048	0.500	0.996	0.998
BCAR1	TLN2	0.097	0.048	0	0.996	0.996
BCAR1	VCL	0.042	0.696	0	0.996	0.999
BCAR1	ZYX	0.049	0.292	0	0.938	0.955
BCAS2	AQR	0.049	0.991	0.900	0.222	0.999
BCAS2	CDC40	0.180	0.992	0.900	0.780	0.999
BCAS2	CDC5L	0.128	0.999	0.900	0.996	0.999
BCAS2	CRNKL1	0.083	0.930	0.900	0.739	0.998
BCAS2	DHX8	0.063	0.840	0.900	0.270	0.987
BCAS2	HSPA8	0.165	0.292	0.800	0.942	0.992
BCAS2	PPIL1	0.146	0.942	0.900	0.475	0.997
BCAS2	PRPF19	0.429	0.999	0.900	0.993	0.999
BCAS2	RBM22	0.060	0.939	0.900	0.517	0.996
BCAS2	SF3A2	0.072	0.914	0	0.364	0.945
BCAS2	SF3B1	0.070	0.873	0	0.217	0.900
BCAS2	SF3B3	0.257	0.838	0	0.268	0.904
BCAS2	SF3B4	0.162	0.998	0	0.091	0.998
BCAS2	SF3B5	0.512	0.800	0	0.065	0.900
BCAS2	SNRNP200	0.127	0.987	0	0.479	0.993
BCAS2	SNRNP40	0.142	0.993	0.900	0.329	0.999
BCAS2	SNRPA1	0.298	0.962	0.900	0.372	0.998
BCAS2	SNRPB2	0.269	0.879	0.900	0.171	0.991
BCAS2	SNRPD1	0.296	0.913	0.900	0.220	0.994
BCAS2	SNRPD2	0.289	0.896	0.900	0	0.991
BCAS2	SNRPD3	0.234	0.895	0.900	0.182	0.992
BCAS2	SNRPF	0.455	0.913	0.900	0	0.994
BCAS2	SYF2	0.067	0.933	0.900	0.774	0.998
BCAS2	XAB2	0.064	0.977	0.900	0.869	0.999
BCL2L1	AKT1	0.095	0.292	0.900	0.888	0.991
BCL2L1	ATG5	0.064	0.292	0	0.989	0.992
BCL2L1	BECN1	0.078	0.956	0.900	0.996	0.999
BCL2L1	CASP3	0.044	0.209	0	0.940	0.950
BCL2L1	CASP8	0.042	0.510	0	0.869	0.933
BCL2L1	CASP9	0.082	0.822	0	0.959	0.992
BCL2L1	IL2	0.083	0	0	0.908	0.912
BCL2L1	KRAS	0.047	0.165	0.900	0.807	0.982
BCL2L1	MAPK8	0.057	0.678	0.900	0.593	0.986
BCL2L1	MAPK9	0.083	0.292	0.900	0.406	0.956
BCL2L1	NLRP1	0.043	0.510	0.900	0.974	0.998
BCL2L1	STAT3	0.055	0.095	0.750	0.790	0.949
BCL2L1	TP53	0.074	0.986	0	0.998	0.999
BCL2L1	XIAP	0.082	0.051	0	0.936	0.939
BCL3	CYLD	0.067	0.528	0.900	0.738	0.986
BCL3	HDAC1	0	0.537	0	0.811	0.909
BCL3	NFKB1	0.175	0.835	0.900	0.984	0.999
BCL3	NFKB2	0.282	0.784	0.900	0.985	0.999
BCL3	NFKBIA	0.257	0	0.720	0.500	0.904
BCL3	REL	0.108	0.188	0	0.936	0.952
BCL3	RELA	0.187	0.188	0	0.925	0.951
BCL3	RELB	0.475	0.344	0	0.882	0.959
BCL9	CTNNB1	0	0.979	0.900	0.996	0.999
BCL9	H3-3B	0	0.800	0.500	0.223	0.915
BCL9	HNF4A	0	0	0	0.979	0.979
BCL9	LEF1	0.056	0	0.540	0.810	0.910
BECN1	AKT1	0.060	0.610	0	0.795	0.918
BECN1	ATG14	0.060	0.994	0.900	0.999	0.999
BECN1	ATG5	0.060	0.096	0.500	0.971	0.986
BECN1	BCL2L1	0.078	0.956	0.900	0.996	0.999
BECN1	BIRC2	0.085	0.994	0	0.354	0.996
BECN1	BIRC3	0	0.994	0	0.268	0.995
BECN1	CASP3	0.049	0.292	0	0.898	0.925
BECN1	CASP8	0.085	0.292	0	0.878	0.914
BECN1	CASP9	0.060	0	0	0.927	0.928
BECN1	HMGB1	0.049	0.628	0.900	0.988	0.999
BECN1	IRS1	0	0.065	0	0.919	0.921
BECN1	MYD88	0.056	0.091	0	0.989	0.990
BECN1	NLRC4	0	0	0	0.958	0.958
BECN1	NRBF2	0.081	0.994	0.900	0.994	0.999
BECN1	PIK3C3	0.105	0.999	0.900	0.999	0.999
BECN1	PIK3R4	0.056	0.999	0.900	0.999	0.999
BECN1	RAB5A	0.092	0.818	0	0.959	0.992
BECN1	TP53	0	0.292	0	0.917	0.939
BECN1	TRAF2	0.054	0.994	0	0.295	0.995
BECN1	ULK1	0	0.998	0.900	0.994	0.999
BECN1	UVRAG	0.067	0.998	0.900	0.999	0.999
BIRC2	BECN1	0.085	0.994	0	0.354	0.996
BIRC2	BIRC3	0.159	0.292	0.900	0.952	0.996
BIRC2	CASP3	0.124	0.843	0.900	0.810	0.997
BIRC2	CASP8	0.085	0.784	0	0.865	0.971
BIRC2	CASP9	0.074	0.911	0.900	0.911	0.999
BIRC2	CD40	0.051	0.645	0.540	0.842	0.972
BIRC2	CFLAR	0.074	0.184	0	0.937	0.948
BIRC2	CYLD	0.135	0.042	0.500	0.878	0.943
BIRC2	FADD	0	0.092	0.900	0.940	0.994
BIRC2	GAPDH	0.044	0.069	0.900	0.462	0.945
BIRC2	IKBKG	0	0.805	0.500	0.926	0.992
BIRC2	MAP3K7	0.106	0.746	0.650	0.660	0.969
BIRC2	MYD88	0.075	0.746	0	0.621	0.903
BIRC2	RBCK1	0.048	0	0.900	0.766	0.975
BIRC2	RIPK1	0.170	0.893	0.900	0.996	0.999
BIRC2	RIPK3	0.051	0.329	0.900	0.672	0.976
BIRC2	RNF31	0	0.673	0.900	0.863	0.995
BIRC2	RPS27A	0.063	0.958	0.500	0.161	0.981
BIRC2	TANK	0.124	0.620	0	0.818	0.934
BIRC2	TNF	0.069	0.994	0.500	0.785	0.999
BIRC2	TNFAIP3	0.101	0.663	0.500	0.599	0.931
BIRC2	TNFRSF1A	0	0.994	0.900	0.995	0.999
BIRC2	TRADD	0.103	0.994	0.800	0.996	0.999
BIRC2	TRAF1	0.087	0.866	0.500	0.997	0.999
BIRC2	TRAF2	0	0.993	0.900	0.993	0.999
BIRC2	TRAF3	0.060	0.705	0.900	0.998	0.999
BIRC2	TRAF5	0	0.066	0.900	0.991	0.999
BIRC2	UBA52	0.045	0.900	0.500	0.065	0.949
BIRC2	UBE2D1	0.061	0.889	0.500	0.635	0.978
BIRC2	UBE2N	0.065	0.501	0.400	0.996	0.998
BIRC2	XIAP	0.067	0.818	0.900	0.835	0.996
BIRC3	BECN1	0	0.994	0	0.268	0.995
BIRC3	BIRC2	0.159	0.292	0.900	0.952	0.996
BIRC3	CASP3	0.106	0.643	0.900	0.922	0.997
BIRC3	CASP8	0.104	0.616	0	0.792	0.922
BIRC3	CASP9	0.067	0.860	0.900	0.763	0.996
BIRC3	CD40	0.192	0.094	0.500	0.795	0.914
BIRC3	CYLD	0.281	0	0.500	0.857	0.944
BIRC3	FADD	0	0.092	0.900	0.595	0.960
BIRC3	GAPDH	0.044	0.096	0.900	0.435	0.944
BIRC3	IKBKG	0	0.453	0.500	0.787	0.936
BIRC3	MAP3K7	0.073	0.746	0.650	0.382	0.942
BIRC3	MYD88	0.080	0.746	0	0.712	0.926
BIRC3	NFKB1	0.202	0.608	0	0.822	0.939
BIRC3	RBCK1	0.044	0.215	0.900	0.325	0.942
BIRC3	RIPK1	0.101	0.855	0.900	0.993	0.999
BIRC3	RIPK3	0.093	0.329	0.900	0.463	0.963
BIRC3	RNF31	0	0.215	0.900	0.373	0.946
BIRC3	TNF	0.161	0.510	0.500	0.849	0.964
BIRC3	TNFAIP3	0.487	0.292	0.500	0.595	0.916
BIRC3	TNFRSF1A	0	0.994	0.900	0.924	0.999
BIRC3	TNFRSF1B	0.084	0.292	0.500	0.822	0.934
BIRC3	TRADD	0.122	0	0.800	0.992	0.998
BIRC3	TRAF1	0.339	0.983	0.500	0.997	0.999
BIRC3	TRAF2	0.067	0.991	0.900	0.990	0.999
BIRC3	TRAF3	0.109	0.719	0.900	0.995	0.999
BIRC3	TRAF5	0.080	0.066	0.900	0.976	0.997
BIRC3	UBE2D1	0.065	0.833	0.500	0.271	0.935
BIRC3	UBE2N	0.065	0.537	0.400	0.838	0.952
BIRC3	XIAP	0.042	0.527	0.900	0.894	0.994
BIRC5	AURKA	0.824	0.492	0.540	0.865	0.993
BIRC5	AURKB	0.764	0.944	0.800	0.996	0.999
BIRC5	BUB1	0.844	0.095	0	0.865	0.979
BIRC5	BUB1B	0.847	0.095	0.500	0.834	0.987
BIRC5	CASP3	0.132	0.583	0	0.786	0.916
BIRC5	CASP9	0.124	0.728	0	0.658	0.911
BIRC5	CCNA2	0.857	0	0	0.707	0.956
BIRC5	CCNB1	0.906	0.098	0.400	0.884	0.993
BIRC5	CCNB2	0.905	0.098	0.400	0.892	0.993
BIRC5	CDC20	0.954	0.045	0.500	0.811	0.995
BIRC5	CDCA8	0.961	0.943	0.800	0.996	0.999
BIRC5	CDK1	0.926	0.510	0.400	0.890	0.997
BIRC5	CENPE	0.786	0.060	0	0.834	0.963
BIRC5	CENPF	0.779	0	0	0.826	0.960
BIRC5	CEP55	0.806	0	0	0.570	0.913
BIRC5	DLGAP5	0.907	0	0	0.661	0.967
BIRC5	ESPL1	0.745	0	0.500	0.404	0.917
BIRC5	INCENP	0.573	0.928	0.800	0.994	0.999
BIRC5	KIF11	0.885	0.067	0	0.637	0.957
BIRC5	KIF20A	0.903	0.053	0	0.732	0.973
BIRC5	KIF2C	0.862	0	0	0.809	0.972
BIRC5	KIF4A	0.853	0	0	0.516	0.925
BIRC5	MAD2L1	0.913	0	0.500	0.614	0.981
BIRC5	NEK2	0.817	0.098	0	0.665	0.940
BIRC5	NUF2	0.852	0	0	0.668	0.949
BIRC5	NUSAP1	0.837	0	0	0.724	0.953
BIRC5	PBK	0.932	0.092	0	0.683	0.978
BIRC5	PLK1	0.852	0	0.500	0.756	0.980
BIRC5	PRC1	0.871	0.292	0	0.398	0.940
BIRC5	PTTG1	0.849	0	0	0.532	0.926
BIRC5	SPC24	0.888	0	0	0.348	0.924
BIRC5	TOP2A	0.868	0	0	0.828	0.976
BIRC5	TP53	0.143	0	0.750	0.703	0.930
BIRC5	TPX2	0.852	0.102	0	0.672	0.952
BIRC5	TTK	0.826	0	0	0.647	0.936
BIRC5	UBE2C	0.956	0.091	0	0.819	0.992
BIRC5	XIAP	0	0.735	0	0.855	0.960
BIRC5	ZWINT	0.770	0	0	0.657	0.917
BLNK	CBL	0	0.292	0.900	0.573	0.967
BLNK	GRB2	0	0.844	0.900	0.972	0.999
BLNK	LCP2	0.160	0	0.900	0.905	0.991
BLNK	SFN	0	0.900	0	0	0.900
BLNK	SYK	0.162	0.625	0.900	0.998	0.999
BLNK	VAV1	0.153	0.317	0.900	0.991	0.999
BLNK	ZAP70	0.100	0	0	0.899	0.905
BOC	CDON	0.125	0.292	0.900	0.180	0.942
BOC	IHH	0	0.972	0.900	0.518	0.998
BOC	PTCH1	0.084	0.124	0.900	0.926	0.993
BOC	PTCH2	0.060	0.124	0.900	0.729	0.974
BOC	SHH	0	0.506	0.900	0.935	0.996
BOC	SMO	0.108	0.073	0.900	0.614	0.963
BRAF	ARRB1	0	0.091	0.900	0.181	0.919
BRAF	ARRB2	0	0.091	0.900	0.590	0.959
BRAF	CDC37	0	0.975	0	0.675	0.991
BRAF	GSK3B	0.049	0	0.900	0.283	0.925
BRAF	HRAS	0.074	0.921	0.900	0.952	0.999
BRAF	HSP90AA1	0	0.784	0	0.933	0.984
BRAF	HSP90AB1	0	0.979	0	0.931	0.998
BRAF	IQGAP1	0	0.629	0.500	0.919	0.983
BRAF	KRAS	0.081	0.870	0.900	0.973	0.999
BRAF	MAP2K1	0.119	0.996	0.900	0.983	0.999
BRAF	MAP2K2	0.102	0.904	0.900	0.835	0.998
BRAF	MAPK1	0.094	0.647	0.700	0.539	0.949
BRAF	MAPK3	0.087	0.653	0.700	0.632	0.960
BRAF	NRAS	0.087	0.871	0.900	0.972	0.999
BRAF	PIK3CA	0.128	0.190	0	0.931	0.947
BRAF	PTEN	0.094	0.206	0	0.927	0.943
BRAF	RAF1	0	0.927	0.900	0.983	0.999
BRAF	RAP1A	0.081	0.720	0.900	0.624	0.989
BRAF	RRAS	0.074	0.284	0.900	0.418	0.956
BRAF	SOS1	0.158	0.084	0	0.881	0.900
BRAF	SPRY2	0	0.310	0.900	0.603	0.970
BRAF	YWHAE	0.067	0.896	0.900	0.529	0.994
BRCA1	ABL1	0	0.483	0.500	0.847	0.956
BRCA1	ABRAXAS1	0.056	0.994	0.900	0.997	0.999
BRCA1	AKT1	0	0.735	0.900	0.786	0.993
BRCA1	ANAPC1	0.100	0	0.900	0.161	0.917
BRCA1	ANAPC10	0.056	0	0.900	0.113	0.909
BRCA1	ANAPC11	0.055	0	0.900	0.157	0.913
BRCA1	ANAPC16	0	0	0.900	0	0.900
BRCA1	ANAPC2	0	0	0.900	0.157	0.912
BRCA1	ANAPC4	0.054	0	0.900	0.126	0.910
BRCA1	ANAPC5	0.062	0	0.900	0.130	0.911
BRCA1	ANAPC7	0.074	0	0.900	0.072	0.906
BRCA1	AR	0	0.612	0	0.773	0.908
BRCA1	ATM	0.042	0.847	0.900	0.999	0.999
BRCA1	ATR	0.106	0.838	0.900	0.812	0.996
BRCA1	ATRIP	0.074	0.777	0.500	0.761	0.972
BRCA1	AURKA	0.298	0.292	0	0.892	0.942
BRCA1	BABAM1	0	0.994	0.900	0.992	0.999
BRCA1	BABAM2	0	0.783	0.900	0.995	0.999
BRCA1	BARD1	0.201	0.999	0.900	0.993	0.999
BRCA1	BRCA2	0.383	0.896	0.900	0.999	0.999
BRCA1	BRCC3	0.055	0.850	0.900	0.995	0.999
BRCA1	BRIP1	0.380	0.999	0.900	0.997	0.999
BRCA1	BUB1B	0.408	0	0.720	0.473	0.905
BRCA1	CCNA2	0.387	0.510	0.500	0.746	0.956
BRCA1	CCNB1	0.315	0.510	0	0.770	0.916
BRCA1	CCND1	0	0.510	0	0.848	0.922
BRCA1	CDC16	0.072	0.164	0.900	0.173	0.927
BRCA1	CDC23	0.100	0	0.900	0.094	0.911
BRCA1	CDC26	0	0	0.900	0.100	0.906
BRCA1	CDC27	0.082	0	0.900	0.230	0.923
BRCA1	CDK2	0.194	0.735	0.500	0.872	0.984
BRCA1	CDK4	0.127	0.625	0.800	0.633	0.972
BRCA1	CHEK2	0.218	0.842	0.500	0.997	0.999
BRCA1	CREBBP	0.061	0.833	0	0.814	0.968
BRCA1	EP300	0.068	0.820	0	0.928	0.986
BRCA1	ERBB2	0	0	0	0.918	0.918
BRCA1	ESR1	0	0.904	0	0.995	0.999
BRCA1	EXO1	0.558	0.292	0.500	0.897	0.981
BRCA1	EZH2	0.227	0.516	0	0.818	0.926
BRCA1	FANCD2	0.472	0.779	0.540	0.998	0.999
BRCA1	FLNA	0	0.292	0	0.888	0.917
BRCA1	HDAC1	0.055	0.510	0	0.917	0.958
BRCA1	HDAC2	0.064	0.610	0	0.883	0.953
BRCA1	HMMR	0.364	0.419	0	0.912	0.964
BRCA1	MDC1	0.104	0.833	0.500	0.996	0.999
BRCA1	MLH1	0.087	0.835	0.540	0.930	0.994
BRCA1	MRE11	0.174	0.994	0.540	0.973	0.999
BRCA1	MSH2	0.227	0.725	0.540	0.946	0.994
BRCA1	MSH3	0.084	0.313	0.540	0.725	0.910
BRCA1	MSH6	0.236	0.611	0.540	0.977	0.996
BRCA1	NBN	0.068	0.868	0.540	0.902	0.993
BRCA1	NELFB	0.044	0.292	0.500	0.745	0.902
BRCA1	PALB2	0.097	0.944	0.900	0.999	0.999
BRCA1	PIAS1	0	0.677	0.400	0.730	0.943
BRCA1	PLK1	0.235	0.781	0	0.783	0.960
BRCA1	PMS2	0.085	0.238	0.540	0.864	0.950
BRCA1	POLR2A	0	0.875	0.500	0.321	0.954
BRCA1	RAD50	0.072	0.994	0.540	0.762	0.999
BRCA1	RBBP7	0.078	0.625	0	0.816	0.930
BRCA1	RNF168	0.060	0.596	0.500	0.920	0.982
BRCA1	RNF8	0.060	0.191	0.500	0.930	0.970
BRCA1	RPA1	0.078	0.803	0.500	0.614	0.960
BRCA1	SMARCA4	0.056	0.628	0	0.957	0.983
BRCA1	STAT1	0.043	0.292	0	0.943	0.958
BRCA1	SUMO2	0.059	0.625	0.500	0.564	0.912
BRCA1	TOPBP1	0.280	0.994	0.540	0.900	0.999
BRCA1	TP53	0.067	0.895	0.500	0.999	0.999
BRCA1	TP53BP1	0.050	0.826	0.500	0.999	0.999
BRCA1	TPX2	0.363	0.635	0	0.690	0.922
BRCA1	UBE2C	0.302	0.089	0.900	0.322	0.951
BRCA1	UBE2D1	0	0.898	0	0.749	0.973
BRCA1	UBE2I	0	0.563	0.500	0.595	0.904
BRCA1	UBE2K	0.049	0.792	0	0.575	0.908
BRCA1	UBE2N	0.056	0.729	0.500	0.694	0.955
BRCA1	UBE2S	0.082	0.089	0.900	0.614	0.963
BRCA2	ATM	0.048	0.313	0.800	0.971	0.995
BRCA2	BABAM2	0	0.566	0.720	0.704	0.960
BRCA2	BARD1	0.188	0.793	0.720	0.995	0.999
BRCA2	BRCA1	0.383	0.896	0.900	0.999	0.999
BRCA2	BRCC3	0.059	0.643	0.720	0.857	0.984
BRCA2	BRIP1	0.435	0.292	0.900	0.975	0.998
BRCA2	BUB1B	0.274	0.625	0.720	0.467	0.953
BRCA2	CDK2	0.088	0.630	0.500	0.718	0.946
BRCA2	CDK4	0.059	0.046	0.800	0.720	0.943
BRCA2	CHEK2	0.100	0.532	0	0.968	0.985
BRCA2	EXO1	0.371	0	0.500	0.858	0.951
BRCA2	FANCD2	0.217	0.842	0.900	0.999	0.999
BRCA2	FLNA	0	0.292	0	0.969	0.977
BRCA2	HMMR	0.256	0	0	0.909	0.929
BRCA2	KAT2B	0	0.625	0	0.880	0.953
BRCA2	MLH1	0.044	0	0.540	0.905	0.954
BRCA2	MRE11	0.126	0	0.500	0.932	0.967
BRCA2	MSH2	0.160	0	0.540	0.925	0.968
BRCA2	MSH6	0.142	0	0.540	0.924	0.967
BRCA2	NBN	0.116	0	0.500	0.795	0.901
BRCA2	PALB2	0.166	0.997	0.900	0.999	0.999
BRCA2	PLK1	0.180	0.982	0	0.745	0.996
BRCA2	PMS2	0.049	0.142	0.540	0.875	0.947
BRCA2	TP53	0.066	0.828	0	0.974	0.995
BRCA2	TP53BP1	0	0.571	0.360	0.740	0.922
BRCC3	ABRAXAS1	0.042	0.997	0.900	0.998	0.999
BRCC3	ANAPC1	0.054	0	0.900	0.069	0.904
BRCC3	ANAPC10	0.091	0	0.900	0	0.905
BRCC3	ANAPC11	0	0.053	0.900	0.108	0.908
BRCC3	ANAPC16	0.096	0	0.900	0	0.905
BRCC3	ANAPC2	0.047	0	0.900	0.060	0.902
BRCC3	ANAPC4	0.145	0	0.900	0	0.910
BRCC3	ANAPC5	0.055	0	0.900	0.070	0.904
BRCC3	ANAPC7	0.099	0	0.900	0.077	0.909
BRCC3	BABAM1	0.128	0.998	0.900	0.998	0.999
BRCC3	BABAM2	0.128	0.999	0.900	0.998	0.999
BRCC3	BARD1	0.062	0.647	0.900	0.994	0.999
BRCC3	BRCA1	0.055	0.850	0.900	0.995	0.999
BRCC3	BRCA2	0.059	0.643	0.720	0.857	0.984
BRCC3	CDC16	0.063	0.073	0.900	0	0.905
BRCC3	CDC23	0.103	0.094	0.900	0.054	0.913
BRCC3	CDC26	0.095	0	0.900	0.083	0.909
BRCC3	CDC27	0.049	0.078	0.900	0	0.904
BRCC3	NLRP3	0	0.735	0.900	0.295	0.979
BRCC3	UBE2C	0.075	0.071	0.900	0.140	0.916
BRCC3	UBE2S	0.045	0.071	0.900	0.267	0.926
BRD4	AR	0	0.585	0	0.929	0.969
BRD4	CDK7	0.056	0.292	0	0.938	0.954
BRD4	E2F1	0.049	0.794	0	0.615	0.918
BRD4	ELOB	0.047	0.897	0	0.256	0.921
BRD4	ELOC	0.062	0.897	0	0.249	0.921
BRD4	EP300	0.326	0.787	0	0.927	0.988
BRD4	FOXO3	0.200	0.900	0	0.551	0.960
BRD4	H3-3B	0.079	0.580	0	0.989	0.995
BRD4	H4C6	0.054	0.875	0	0.992	0.999
BRD4	HDAC1	0.098	0.791	0	0.775	0.954
BRD4	POLR2A	0.119	0.743	0	0.728	0.933
BRD4	RELA	0.091	0.974	0	0.986	0.999
BRD4	SMARCA4	0.117	0.797	0	0.783	0.957
BRD4	TP53	0.049	0.735	0	0.966	0.990
BRD4	VHL	0.049	0.926	0	0.203	0.939
BRD7	ACTB	0.047	0.862	0.800	0.495	0.985
BRD7	ACTL6A	0.138	0.911	0.800	0.943	0.999
BRD7	ARID1A	0.060	0.287	0	0.962	0.972
BRD7	ARID1B	0.049	0.287	0	0.936	0.952
BRD7	ARID2	0.117	0.983	0.800	0.997	0.999
BRD7	EP300	0.105	0.292	0.800	0.482	0.925
BRD7	H4C6	0	0.902	0	0.247	0.924
BRD7	PBRM1	0.168	0.968	0.800	0.991	0.999
BRD7	PHF10	0.068	0.947	0.800	0.995	0.999
BRD7	SMARCA2	0.049	0.709	0.650	0.790	0.977
BRD7	SMARCA4	0.049	0.984	0.650	0.986	0.999
BRD7	SMARCB1	0.087	0.967	0.540	0.931	0.998
BRD7	SMARCC1	0.367	0.815	0.650	0.872	0.994
BRD7	SMARCC2	0.202	0.986	0.650	0.817	0.999
BRD7	SMARCD1	0.074	0.987	0.800	0.648	0.999
BRD7	SMARCD2	0.068	0.699	0.800	0.540	0.970
BRD7	SMARCD3	0.067	0.632	0.800	0.502	0.961
BRD7	SMARCE1	0.106	0.988	0.800	0.906	0.999
BRD7	TP53	0.103	0.685	0.500	0.938	0.990
BRIP1	ATM	0.042	0	0.800	0.678	0.933
BRIP1	BARD1	0.112	0.994	0.540	0.753	0.999
BRIP1	BRCA1	0.380	0.999	0.900	0.997	0.999
BRIP1	BRCA2	0.435	0.292	0.900	0.975	0.998
BRIP1	FANCD2	0.209	0.515	0	0.993	0.997
BRIP1	MLH1	0.088	0.994	0.900	0.950	0.999
BRIP1	MRE11	0.117	0.994	0.500	0.497	0.998
BRIP1	NBN	0.063	0.994	0.500	0.548	0.998
BRIP1	PALB2	0.149	0.292	0.900	0.980	0.998
BRIP1	PMS2	0.110	0.821	0.900	0.615	0.993
BRIP1	RPA1	0.096	0.469	0.500	0.773	0.938
BRIP1	TOPBP1	0.158	0.994	0.900	0.984	0.999
BTRC	APC	0.141	0.787	0.800	0.962	0.998
BTRC	AXIN1	0.067	0.843	0.500	0.996	0.999
BTRC	AXIN2	0.049	0.152	0	0.926	0.935
BTRC	CD4	0	0	0.900	0.496	0.947
BTRC	CSNK1A1	0.080	0.219	0.500	0.818	0.926
BTRC	CTBP1	0.055	0	0.800	0.546	0.906
BTRC	CTNNB1	0.051	0.999	0.900	0.997	0.999
BTRC	CUL1	0.080	0.999	0.900	0.998	0.999
BTRC	FBXO4	0.042	0	0.900	0.479	0.945
BTRC	FBXO5	0.049	0.651	0.900	0.798	0.992
BTRC	FBXW11	0.255	0.841	0.900	0.529	0.993
BTRC	GSK3B	0.118	0.971	0.500	0.995	0.999
BTRC	IKBKB	0.049	0.708	0.500	0.687	0.950
BTRC	MDM2	0.059	0.292	0.900	0.477	0.960
BTRC	NEDD8	0.046	0.933	0.500	0.572	0.984
BTRC	NFKB1	0	0.838	0.500	0.598	0.964
BTRC	NFKB2	0	0.839	0.500	0.575	0.963
BTRC	NFKBIA	0	0.995	0.900	0.984	0.999
BTRC	NFKBIB	0	0.618	0.900	0.602	0.983
BTRC	PLK1	0	0.473	0.500	0.833	0.952
BTRC	RASSF5	0	0.505	0.800	0.475	0.943
BTRC	RBX1	0	0.959	0.900	0.997	0.999
BTRC	RPS27A	0.046	0.802	0.500	0.109	0.904
BTRC	SKP1	0	0.999	0.900	0.999	0.999
BTRC	SKP2	0.049	0.292	0.900	0.975	0.998
BTRC	UBA52	0	0.800	0.500	0.127	0.905
BTRC	UBE2D1	0.044	0.358	0.800	0.648	0.951
BUB1	ANLN	0.791	0	0	0.619	0.917
BUB1	ASPM	0.907	0.111	0	0.741	0.976
BUB1	AURKA	0.836	0.089	0	0.822	0.971
BUB1	AURKB	0.827	0.089	0	0.984	0.997
BUB1	BIRC5	0.844	0.095	0	0.865	0.979
BUB1	BUB1B	0.920	0.919	0.500	0.989	0.999
BUB1	BUB3	0.161	0.973	0.900	0.999	0.999
BUB1	CCNA2	0.879	0	0	0.851	0.981
BUB1	CCNB1	0.846	0.279	0.400	0.900	0.992
BUB1	CCNB2	0.892	0.279	0.400	0.970	0.998
BUB1	CDC20	0.907	0.996	0.800	0.993	0.999
BUB1	CDC23	0.097	0.750	0	0.732	0.934
BUB1	CDC25C	0.784	0	0	0.651	0.921
BUB1	CDCA8	0.847	0	0	0.818	0.971
BUB1	CDK1	0.890	0.354	0.400	0.964	0.998
BUB1	CENPE	0.839	0.259	0	0.934	0.991
BUB1	CENPF	0.871	0	0	0.903	0.987
BUB1	CEP55	0.847	0	0	0.548	0.928
BUB1	DLGAP5	0.949	0	0	0.751	0.986
BUB1	ESPL1	0.775	0	0.500	0.919	0.990
BUB1	EXO1	0.828	0.073	0	0.594	0.929
BUB1	HMMR	0.807	0.115	0	0.508	0.909
BUB1	KIF11	0.912	0.310	0	0.774	0.985
BUB1	KIF20A	0.863	0.314	0	0.601	0.959
BUB1	KIF2C	0.862	0.069	0	0.963	0.994
BUB1	KIF4A	0.823	0.081	0	0.733	0.952
BUB1	KNL1	0.458	0.990	0	0.971	0.999
BUB1	MAD1L1	0	0.959	0.900	0.642	0.998
BUB1	MAD2L1	0.841	0.875	0.900	0.940	0.999
BUB1	NCAPG	0.908	0	0	0.756	0.976
BUB1	NCAPH	0.838	0	0	0.606	0.933
BUB1	NDC80	0.932	0.838	0	0.853	0.998
BUB1	NEK2	0.819	0	0	0.639	0.932
BUB1	NUF2	0.901	0.787	0	0.757	0.994
BUB1	NUSAP1	0.858	0	0	0.575	0.937
BUB1	PBK	0.869	0.062	0	0.516	0.935
BUB1	PLK1	0.587	0.390	0.800	0.936	0.996
BUB1	PTTG1	0.744	0	0	0.833	0.955
BUB1	RPS6KA1	0	0	0.900	0.192	0.915
BUB1	SPC24	0.308	0.781	0	0.555	0.926
BUB1	SPC25	0.814	0.781	0	0.271	0.967
BUB1	TOP2A	0.918	0	0	0.790	0.982
BUB1	TPX2	0.847	0	0	0.740	0.958
BUB1	TTK	0.989	0.292	0	0.945	0.999
BUB1	UBE2C	0.887	0	0	0.607	0.954
BUB1	ZWINT	0.640	0.786	0	0.895	0.991
BUB1B	ANAPC1	0.100	0.995	0.720	0.451	0.999
BUB1B	ANAPC10	0.069	0.999	0.720	0.719	0.999
BUB1B	ANAPC11	0	0.746	0.720	0.537	0.964
BUB1B	ANAPC16	0	0.965	0.720	0.307	0.992
BUB1B	ANAPC2	0.061	0.993	0.720	0.549	0.999
BUB1B	ANAPC4	0.049	0.999	0.720	0.324	0.999
BUB1B	ANAPC5	0.058	0.990	0.720	0.475	0.998
BUB1B	ANAPC7	0.065	0.998	0.720	0.201	0.999
BUB1B	ASPM	0.928	0.111	0	0.628	0.974
BUB1B	AURKA	0.723	0.089	0	0.722	0.924
BUB1B	AURKB	0.637	0.327	0.500	0.992	0.999
BUB1B	BIRC5	0.847	0.095	0.500	0.834	0.987
BUB1B	BRCA1	0.408	0	0.720	0.473	0.905
BUB1B	BRCA2	0.274	0.625	0.720	0.467	0.953
BUB1B	BUB1	0.920	0.919	0.500	0.989	0.999
BUB1B	BUB3	0.130	0.998	0.800	0.999	0.999
BUB1B	CCNA2	0.865	0.292	0.500	0.904	0.994
BUB1B	CCNB1	0.847	0.279	0.720	0.966	0.998
BUB1B	CCNB2	0.835	0.279	0.400	0.914	0.993
BUB1B	CDC16	0.065	0.992	0.720	0.732	0.999
BUB1B	CDC20	0.901	0.999	0.800	0.999	0.999
BUB1B	CDC23	0.091	0.999	0.720	0.660	0.999
BUB1B	CDC26	0	0.964	0.720	0.324	0.992
BUB1B	CDC27	0.062	0.999	0.720	0.845	0.999
BUB1B	CDCA8	0.921	0	0.500	0.862	0.994
BUB1B	CDK1	0.846	0.126	0.500	0.994	0.999
BUB1B	CENPE	0.840	0.636	0.500	0.998	0.999
BUB1B	CENPF	0.903	0	0.900	0.918	0.999
BUB1B	CEP55	0.841	0	0	0.632	0.939
BUB1B	DLGAP5	0.928	0	0	0.746	0.981
BUB1B	ESPL1	0.869	0	0.500	0.847	0.989
BUB1B	FZR1	0.208	0.758	0.540	0.813	0.981
BUB1B	INCENP	0.384	0.098	0.500	0.722	0.912
BUB1B	JUN	0	0	0.900	0.180	0.914
BUB1B	KIF11	0.937	0.310	0	0.875	0.994
BUB1B	KIF20A	0.911	0.071	0	0.752	0.977
BUB1B	KIF2C	0.877	0.071	0.500	0.863	0.991
BUB1B	KIF4A	0.896	0.081	0	0.696	0.968
BUB1B	KNL1	0.403	0.977	0.500	0.984	0.999
BUB1B	MAD1L1	0.049	0.613	0.900	0.854	0.993
BUB1B	MAD2L1	0.720	0.999	0.800	0.988	0.999
BUB1B	NCAPG	0.837	0	0	0.719	0.952
BUB1B	NCAPH	0.851	0	0	0.455	0.915
BUB1B	NDC80	0.856	0.238	0.720	0.793	0.992
BUB1B	NEK2	0.839	0.994	0.500	0.640	0.999
BUB1B	NUF2	0.853	0.189	0.500	0.717	0.980
BUB1B	NUSAP1	0.852	0	0	0.696	0.953
BUB1B	PBK	0.853	0.062	0	0.579	0.937
BUB1B	PLK1	0.838	0.845	0.720	0.932	0.999
BUB1B	PTTG1	0.606	0.336	0	0.923	0.978
BUB1B	RRM2	0.823	0	0	0.576	0.922
BUB1B	SPC25	0.836	0	0.500	0.211	0.930
BUB1B	TOP2A	0.925	0	0	0.747	0.980
BUB1B	TPX2	0.849	0	0	0.595	0.936
BUB1B	TTK	0.865	0.292	0	0.918	0.991
BUB1B	UBE2C	0.832	0.287	0.720	0.768	0.991
BUB1B	ZWINT	0.787	0.823	0.500	0.814	0.996
BUB3	ANAPC1	0.068	0.781	0.650	0.401	0.951
BUB3	ANAPC4	0.066	0.994	0.650	0.338	0.998
BUB3	ANAPC5	0.102	0.781	0.650	0.606	0.969
BUB3	AURKB	0.192	0.124	0.500	0.859	0.943
BUB3	BUB1	0.161	0.973	0.900	0.999	0.999
BUB3	BUB1B	0.130	0.998	0.800	0.999	0.999
BUB3	CDC16	0.078	0.781	0.650	0.639	0.971
BUB3	CDC20	0.241	0.995	0.800	0.998	0.999
BUB3	CDC23	0.162	0.803	0.650	0.690	0.979
BUB3	CDC26	0.060	0.781	0.650	0.370	0.948
BUB3	CDC27	0.096	0.994	0.650	0.690	0.999
BUB3	CDK1	0.323	0.091	0.500	0.783	0.924
BUB3	CENPE	0.109	0.113	0.500	0.854	0.935
BUB3	ESPL1	0.067	0	0.500	0.867	0.932
BUB3	FZR1	0.192	0.239	0	0.854	0.903
BUB3	KNL1	0.127	0.267	0.500	0.991	0.996
BUB3	MAD1L1	0.056	0.435	0.900	0.677	0.980
BUB3	MAD2L1	0.489	0.845	0.800	0.966	0.999
BUB3	TTK	0.185	0	0	0.898	0.913
BYSL	CSNK1A1	0.055	0.900	0	0	0.901
BYSL	DHX15	0.831	0.270	0	0.774	0.969
BYSL	FAU	0.058	0.973	0	0.252	0.979
BYSL	LTV1	0.916	0.997	0.540	0.991	0.999
BYSL	RACK1	0.105	0.966	0	0.198	0.973
BYSL	RIOK2	0.349	0.991	0.540	0.941	0.999
BYSL	RPS10	0.123	0.746	0	0.690	0.925
BYSL	RPS11	0.137	0.989	0	0.182	0.992
BYSL	RPS12	0.174	0.994	0	0.131	0.995
BYSL	RPS13	0.082	0.991	0	0.227	0.993
BYSL	RPS14	0.083	0.969	0.800	0.425	0.996
BYSL	RPS15	0.108	0.991	0	0.513	0.996
BYSL	RPS15A	0.096	0.958	0	0	0.961
BYSL	RPS16	0.080	0.996	0	0.200	0.997
BYSL	RPS17	0.092	0.972	0	0.288	0.980
BYSL	RPS18	0.099	0.989	0	0.206	0.992
BYSL	RPS19	0.132	0.991	0	0.395	0.994
BYSL	RPS2	0.099	0.992	0.800	0.367	0.998
BYSL	RPS20	0.080	0.971	0	0.645	0.989
BYSL	RPS21	0.097	0.992	0	0	0.992
BYSL	RPS23	0.082	0.981	0	0.193	0.984
BYSL	RPS24	0.097	0.989	0	0.300	0.992
BYSL	RPS25	0.097	0.913	0	0.254	0.936
BYSL	RPS26	0.092	0.856	0	0.752	0.964
BYSL	RPS27	0.101	0.958	0.500	0.108	0.981
BYSL	RPS27A	0.058	0.956	0	0.133	0.961
BYSL	RPS27L	0.049	0.813	0.500	0	0.903
BYSL	RPS28	0.097	0.989	0	0.222	0.991
BYSL	RPS3	0.081	0.986	0	0.923	0.998
BYSL	RPS3A	0.075	0.989	0	0.223	0.992
BYSL	RPS4X	0.067	0.965	0.500	0.088	0.983
BYSL	RPS5	0.113	0.992	0	0.363	0.995
BYSL	RPS6	0.097	0.991	0.800	0.654	0.999
BYSL	RPS7	0.092	0.989	0.800	0.292	0.998
BYSL	RPS8	0.067	0.991	0	0.322	0.994
BYSL	RPS9	0.264	0.989	0.800	0.198	0.998
BYSL	RPSA	0.131	0.971	0	0.160	0.977
C3	ITGAM	0.054	0.926	0.900	0.915	0.999
C3	ITGB2	0.074	0.292	0.900	0.980	0.998
C3	SELP	0.078	0	0	0.991	0.991
CACNA1C	ADRB2	0	0.095	0	0.933	0.937
CACNA1C	CALM3	0	0.989	0.900	0.994	0.999
CACNA1C	CALML3	0	0.423	0.900	0.990	0.999
CACNA1C	CALML5	0	0.423	0.900	0.990	0.999
CACNA1C	CALML6	0	0.136	0.900	0.990	0.999
CACNA1C	RYR1	0.140	0.091	0.720	0.780	0.945
CACNA1C	RYR2	0.162	0.324	0	0.970	0.981
CACYBP	APC	0	0	0.900	0	0.900
CACYBP	AXIN1	0	0	0.900	0.091	0.905
CACYBP	CTNNB1	0.047	0.796	0.720	0.536	0.971
CACYBP	GSK3B	0.042	0	0.900	0.182	0.914
CACYBP	SKP1	0.120	0.840	0.900	0.991	0.999
CALM3	CACNA1C	0	0.989	0.900	0.994	0.999
CALM3	CALML3	0	0	0.900	0.968	0.996
CALM3	CALML5	0	0	0.900	0.969	0.996
CALM3	CALML6	0	0	0.900	0.969	0.996
CALM3	CAV1	0.045	0	0.800	0.959	0.991
CALM3	CAV2	0.055	0	0.800	0.651	0.928
CALM3	ESR1	0	0.916	0	0.942	0.995
CALM3	FLNA	0.062	0.421	0	0.902	0.942
CALM3	HRAS	0.096	0.130	0.900	0.610	0.965
CALM3	HSP90AA1	0.045	0.071	0.800	0.984	0.996
CALM3	HSP90AB1	0.053	0.071	0.800	0.977	0.995
CALM3	IQGAP1	0	0.506	0	0.993	0.996
CALM3	IQGAP2	0	0.307	0	0.914	0.938
CALM3	KRAS	0.081	0.130	0.900	0.978	0.998
CALM3	MYLK2	0.067	0.129	0.650	0.993	0.997
CALM3	NOS3	0	0.927	0.900	0.996	0.999
CALM3	NRAS	0.074	0.130	0.900	0.554	0.959
CALM3	PIK3C3	0	0	0	0.978	0.978
CALM3	PLCG1	0	0	0.900	0.447	0.942
CALM3	RYR1	0	0.938	0.900	0.979	0.999
CALM3	RYR2	0	0.938	0.900	0.994	0.999
CALM3	SELL	0	0.900	0	0.701	0.968
CALML3	CACNA1C	0	0.423	0.900	0.990	0.999
CALML3	CALM3	0	0	0.900	0.968	0.996
CALML3	CALML5	0.162	0	0.900	0.632	0.967
CALML3	CALML6	0	0	0.900	0.632	0.962
CALML3	CAV1	0.045	0	0.800	0.980	0.996
CALML3	CAV2	0.055	0	0.800	0.691	0.936
CALML3	ESR1	0.044	0.045	0	0.981	0.981
CALML3	HRAS	0.074	0.130	0.900	0.598	0.963
CALML3	HSP90AA1	0.045	0.071	0.800	0.983	0.996
CALML3	HSP90AB1	0.045	0.071	0.800	0.978	0.995
CALML3	IQGAP1	0	0.369	0	0.993	0.995
CALML3	IQGAP2	0	0.348	0	0.888	0.924
CALML3	KRAS	0.074	0.130	0.900	0.982	0.998
CALML3	MYLK2	0.067	0.129	0.650	0.993	0.997
CALML3	NOS3	0	0.066	0.900	0.996	0.999
CALML3	NRAS	0.074	0.130	0.900	0.544	0.958
CALML3	PIK3C3	0	0	0	0.976	0.976
CALML3	PLCG1	0	0	0.900	0.420	0.939
CALML3	RYR1	0.047	0.409	0.900	0.989	0.999
CALML3	RYR2	0	0.409	0.900	0.993	0.999
CALML3	SRC	0	0.099	0	0.922	0.927
CALML5	CACNA1C	0	0.423	0.900	0.990	0.999
CALML5	CALM3	0	0	0.900	0.969	0.996
CALML5	CALML3	0.162	0	0.900	0.632	0.967
CALML5	CALML6	0	0	0.900	0.633	0.963
CALML5	CAV1	0.045	0	0.800	0.980	0.996
CALML5	CAV2	0.055	0	0.800	0.691	0.936
CALML5	ESR1	0.059	0.045	0	0.979	0.979
CALML5	HRAS	0.074	0.130	0.900	0.598	0.963
CALML5	HSP90AA1	0.045	0.071	0.800	0.983	0.996
CALML5	HSP90AB1	0.045	0.071	0.800	0.976	0.995
CALML5	IQGAP1	0	0.307	0	0.993	0.995
CALML5	IQGAP2	0	0.307	0	0.888	0.919
CALML5	KRAS	0.074	0.130	0.900	0.983	0.998
CALML5	MYLK2	0.067	0.129	0.650	0.993	0.997
CALML5	NOS3	0	0.066	0.900	0.996	0.999
CALML5	NRAS	0.074	0.130	0.900	0.544	0.958
CALML5	PIK3C3	0	0	0	0.976	0.976
CALML5	PLCG1	0	0	0.900	0.420	0.939
CALML5	RYR1	0.060	0.409	0.900	0.989	0.999
CALML5	RYR2	0	0.409	0.900	0.993	0.999
CALML5	SRC	0	0.099	0	0.922	0.927
CALML6	CACNA1C	0	0.136	0.900	0.990	0.999
CALML6	CALM3	0	0	0.900	0.969	0.996
CALML6	CALML3	0	0	0.900	0.632	0.962
CALML6	CALML5	0	0	0.900	0.633	0.963
CALML6	CAV1	0.045	0	0.800	0.979	0.995
CALML6	CAV2	0.045	0	0.800	0.682	0.933
CALML6	ESR1	0	0.045	0	0.979	0.979
CALML6	HRAS	0.074	0.097	0.900	0.579	0.960
CALML6	HSP90AA1	0	0.070	0.800	0.982	0.996
CALML6	HSP90AB1	0	0.070	0.800	0.975	0.995
CALML6	IQGAP1	0	0.149	0	0.993	0.994
CALML6	KRAS	0.074	0.097	0.900	0.982	0.998
CALML6	MYLK2	0.210	0.129	0.650	0.993	0.998
CALML6	NOS3	0	0.046	0.900	0.996	0.999
CALML6	NRAS	0.074	0.097	0.900	0.522	0.954
CALML6	PIK3C3	0	0	0	0.975	0.975
CALML6	PLCG1	0	0	0.900	0.400	0.937
CALML6	RYR1	0.044	0.218	0.900	0.989	0.999
CALML6	RYR2	0	0.218	0.900	0.993	0.999
CALML6	SRC	0	0.099	0	0.922	0.927
CARD9	CASP8	0.067	0.292	0.900	0.974	0.998
CARD9	CHUK	0.055	0.041	0.900	0.301	0.928
CARD9	CLEC6A	0	0	0	0.922	0.922
CARD9	CLEC7A	0.094	0	0	0.971	0.973
CARD9	IKBKB	0.055	0.041	0.900	0.506	0.949
CARD9	IKBKG	0.086	0	0.900	0.290	0.929
CARD9	MAPK1	0.062	0.048	0.900	0.175	0.916
CARD9	MAPK14	0.098	0.048	0.900	0.378	0.939
CARD9	MAPK3	0.082	0.048	0.900	0.258	0.926
CARD9	MAPK8	0	0	0.900	0.244	0.921
CARD9	MAPK9	0	0	0.900	0.129	0.909
CARD9	SYK	0.097	0.041	0.900	0.997	0.999
CARM1	CREBBP	0.067	0.749	0.400	0.881	0.981
CARM1	EP300	0.060	0.842	0.800	0.980	0.999
CARM1	ESR1	0	0.479	0.900	0.519	0.972
CARM1	FOS	0	0.311	0.900	0.217	0.941
CARM1	H3-3B	0.076	0.909	0	0.723	0.975
CARM1	JUN	0	0	0.900	0.529	0.950
CARM1	KAT2B	0.087	0.319	0.500	0.790	0.926
CARM1	MAPK14	0.087	0.071	0.900	0.167	0.919
CARM1	MAPK8	0.119	0.066	0.900	0.089	0.915
CARM1	MAPK9	0.116	0.066	0.900	0	0.910
CARM1	MED1	0.119	0.052	0.900	0.418	0.944
CARM1	NCOA3	0.063	0.826	0.900	0.883	0.997
CARM1	RPS6KB1	0.054	0.067	0.900	0.158	0.915
CARM1	SP1	0.108	0.066	0.900	0.176	0.922
CARM1	SRC	0.094	0.046	0.900	0.563	0.957
CARM1	TP53	0	0.455	0.500	0.767	0.930
CASP1	AIM2	0.157	0.626	0.900	0.999	0.999
CASP1	CASP5	0.382	0	0.900	0.984	0.998
CASP1	CASP8	0.152	0.544	0.900	0.986	0.999
CASP1	CFLAR	0.115	0	0	0.936	0.940
CASP1	FADD	0.087	0.067	0	0.950	0.954
CASP1	GSDMD	0.134	0.932	0.900	0.905	0.999
CASP1	IL18	0.105	0.292	0.900	0.979	0.998
CASP1	IL1A	0.107	0.292	0.500	0.912	0.968
CASP1	IL1B	0.265	0.787	0.900	0.987	0.999
CASP1	IL33	0.074	0.510	0.900	0.765	0.987
CASP1	IL37	0.052	0.292	0.700	0.770	0.947
CASP1	MEFV	0.061	0.298	0.900	0.999	0.999
CASP1	MYD88	0.189	0.046	0	0.907	0.921
CASP1	NEK7	0.042	0	0	0.939	0.939
CASP1	NLRC4	0.138	0.791	0.900	0.999	0.999
CASP1	NLRP1	0.090	0.510	0.900	0.999	0.999
CASP1	NLRP3	0.150	0.307	0.900	0.999	0.999
CASP1	NLRP6	0.099	0	0.900	0.994	0.999
CASP1	PYCARD	0.318	0.983	0.900	0.999	0.999
CASP1	RIPK3	0.205	0.067	0	0.907	0.925
CASP1	TLR4	0.263	0.062	0	0.888	0.916
CASP1	TNF	0.171	0.091	0	0.883	0.904
CASP1	XIAP	0.067	0.184	0	0.959	0.966
CASP10	CASP3	0.109	0.544	0.900	0.332	0.969
CASP10	CASP8	0.149	0.880	0.900	0.985	0.999
CASP10	CFLAR	0.146	0.829	0.900	0.900	0.998
CASP10	FADD	0.103	0.843	0.900	0.997	0.999
CASP10	FAS	0.116	0.793	0.900	0.822	0.996
CASP10	FASLG	0.095	0.707	0.500	0.881	0.982
CASP10	RIPK1	0.093	0.526	0.900	0.923	0.996
CASP10	TICAM1	0.099	0	0.900	0.044	0.906
CASP10	TNFRSF10A	0.048	0.515	0.500	0.804	0.948
CASP10	TNFRSF10B	0.047	0.620	0.500	0.790	0.957
CASP10	TNFRSF1A	0.045	0.617	0	0.754	0.902
CASP10	TP53	0.081	0	0.750	0.759	0.939
CASP10	TRADD	0.071	0.053	0.900	0.961	0.996
CASP3	ACTB	0.042	0.095	0.900	0.893	0.989
CASP3	ACTG1	0.049	0.095	0.900	0.209	0.922
CASP3	AKT1	0.044	0.311	0	0.923	0.945
CASP3	APPL1	0.044	0.093	0.900	0.225	0.923
CASP3	BCL2L1	0.044	0.209	0	0.940	0.950
CASP3	BECN1	0.049	0.292	0	0.898	0.925
CASP3	BIRC2	0.124	0.843	0.900	0.810	0.997
CASP3	BIRC3	0.106	0.643	0.900	0.922	0.997
CASP3	BIRC5	0.132	0.583	0	0.786	0.916
CASP3	CASP10	0.109	0.544	0.900	0.332	0.969
CASP3	CASP8	0.105	0.786	0.900	0.983	0.999
CASP3	CASP9	0.049	0.846	0.900	0.957	0.999
CASP3	CDH1	0.062	0.387	0.750	0.731	0.956
CASP3	CDKN1A	0.057	0.828	0.900	0.806	0.996
CASP3	CTNNB1	0.088	0.395	0.750	0.782	0.965
CASP3	FADD	0.106	0.067	0.360	0.920	0.951
CASP3	FAS	0.116	0.071	0.360	0.851	0.911
CASP3	GSDMD	0.042	0.091	0.750	0.667	0.918
CASP3	GZMB	0.061	0.515	0.900	0.735	0.986
CASP3	HSPA4	0.047	0.069	0	0.903	0.906
CASP3	MAPK1	0.100	0.045	0.900	0.599	0.961
CASP3	MAPK3	0.067	0.045	0.900	0.858	0.985
CASP3	MAPK8	0.049	0.292	0	0.922	0.943
CASP3	MDM2	0.066	0.832	0	0.803	0.966
CASP3	PAK1	0.049	0	0.900	0.247	0.922
CASP3	PAK2	0.044	0.387	0.900	0.321	0.954
CASP3	RIPK1	0.136	0.067	0.360	0.842	0.908
CASP3	ROCK1	0.108	0.436	0.750	0.714	0.959
CASP3	STK4	0.067	0.401	0.900	0.223	0.950
CASP3	TNF	0.098	0.096	0	0.932	0.939
CASP3	TP53	0.093	0.292	0	0.937	0.956
CASP3	XIAP	0.069	0.998	0.900	0.998	0.999
CASP5	AIM2	0.180	0	0.900	0.884	0.989
CASP5	CASP1	0.382	0	0.900	0.984	0.998
CASP5	GSDMD	0.122	0.266	0.900	0.804	0.985
CASP5	MEFV	0.111	0.050	0.540	0.862	0.939
CASP5	NLRC4	0.137	0.070	0.720	0.911	0.977
CASP5	NLRP1	0.074	0.292	0.900	0.998	0.999
CASP5	NLRP3	0.131	0.062	0.900	0.924	0.993
CASP5	NLRP6	0.122	0	0.900	0.671	0.968
CASP5	PYCARD	0.160	0.094	0.900	0.997	0.999
CASP8	ATG5	0.087	0.235	0	0.967	0.975
CASP8	ATM	0.197	0	0.900	0.560	0.961
CASP8	BCL2L1	0.042	0.510	0	0.869	0.933
CASP8	BECN1	0.085	0.292	0	0.878	0.914
CASP8	BIRC2	0.085	0.784	0	0.865	0.971
CASP8	BIRC3	0.104	0.616	0	0.792	0.922
CASP8	CARD9	0.067	0.292	0.900	0.974	0.998
CASP8	CASP1	0.152	0.544	0.900	0.986	0.999
CASP8	CASP10	0.149	0.880	0.900	0.985	0.999
CASP8	CASP3	0.105	0.786	0.900	0.983	0.999
CASP8	CASP9	0.104	0.628	0.540	0.678	0.944
CASP8	CFLAR	0.157	0.991	0.900	0.991	0.999
CASP8	CHUK	0.093	0.311	0.500	0.861	0.950
CASP8	CYLD	0.071	0.304	0.900	0.625	0.972
CASP8	FADD	0.108	0.994	0.900	0.999	0.999
CASP8	FAS	0.127	0.927	0.900	0.997	0.999
CASP8	FASLG	0.097	0.836	0.500	0.992	0.999
CASP8	GZMB	0.050	0.292	0.900	0.502	0.962
CASP8	IKBKG	0.074	0	0.700	0.873	0.961
CASP8	IL1B	0.081	0.320	0.500	0.839	0.943
CASP8	MLKL	0.125	0.210	0	0.959	0.969
CASP8	NLRC4	0.049	0.631	0	0.860	0.946
CASP8	NLRP3	0.058	0.242	0	0.934	0.948
CASP8	PYCARD	0.092	0.737	0.900	0.736	0.992
CASP8	RIPK1	0.122	0.994	0.900	0.997	0.999
CASP8	RIPK3	0.101	0.994	0.900	0.997	0.999
CASP8	TICAM1	0.083	0.510	0.900	0.560	0.977
CASP8	TLR3	0.100	0.343	0.500	0.770	0.923
CASP8	TNF	0.101	0.994	0	0.928	0.999
CASP8	TNFRSF10A	0.063	0.912	0.500	0.944	0.997
CASP8	TNFRSF10B	0.056	0.920	0.500	0.990	0.999
CASP8	TNFRSF1A	0.045	0.593	0	0.996	0.998
CASP8	TP53	0.086	0.292	0.900	0.879	0.991
CASP8	TRADD	0.064	0.821	0.900	0.997	0.999
CASP8	TRAF1	0.089	0.510	0.750	0.791	0.973
CASP8	TRAF2	0.055	0.835	0.500	0.940	0.994
CASP8	XIAP	0.085	0.676	0	0.909	0.970
CASP9	AKT1	0.085	0.067	0.900	0.887	0.989
CASP9	BCL2L1	0.082	0.822	0	0.959	0.992
CASP9	BECN1	0.060	0	0	0.927	0.928
CASP9	BIRC2	0.074	0.911	0.900	0.911	0.999
CASP9	BIRC3	0.067	0.860	0.900	0.763	0.996
CASP9	BIRC5	0.124	0.728	0	0.658	0.911
CASP9	CASP3	0.049	0.846	0.900	0.957	0.999
CASP9	CASP8	0.104	0.628	0.540	0.678	0.944
CASP9	TP53	0.067	0	0	0.952	0.953
CASP9	XIAP	0.085	0.997	0.900	0.998	0.999
CAV1	AKT1	0.074	0.046	0.500	0.875	0.937
CAV1	CALM3	0.045	0	0.800	0.959	0.991
CAV1	CALML3	0.045	0	0.800	0.980	0.996
CAV1	CALML5	0.045	0	0.800	0.980	0.996
CAV1	CALML6	0.045	0	0.800	0.979	0.995
CAV1	CAV2	0.794	0.829	0.900	0.985	0.999
CAV1	CAVIN1	0.391	0.642	0.400	0.997	0.999
CAV1	CD36	0.053	0	0	0.956	0.956
CAV1	CSK	0.051	0.627	0.400	0.717	0.931
CAV1	CTNNB1	0.043	0.514	0	0.886	0.942
CAV1	DPP4	0.058	0	0	0.991	0.991
CAV1	EGFR	0.206	0.882	0.800	0.986	0.999
CAV1	ESR1	0.053	0.624	0.500	0.992	0.998
CAV1	FLNA	0.109	0	0	0.901	0.908
CAV1	FYN	0.051	0.511	0.900	0.944	0.997
CAV1	GJA1	0.165	0.329	0.400	0.908	0.965
CAV1	HRAS	0.048	0.294	0	0.965	0.974
CAV1	HSP90AA1	0.075	0.292	0.800	0.920	0.988
CAV1	HSP90AB1	0.069	0	0.800	0.918	0.983
CAV1	ICAM1	0.074	0	0	0.932	0.934
CAV1	KDR	0.071	0.301	0	0.947	0.962
CAV1	NOS3	0.044	0.736	0.800	0.995	0.999
CAV1	PTEN	0	0.345	0	0.872	0.912
CAV1	RAC1	0.059	0.756	0.500	0.291	0.908
CAV1	SRC	0.051	0.622	0.900	0.994	0.999
CAV1	TLR4	0.051	0.292	0	0.949	0.962
CAV2	CALM3	0.055	0	0.800	0.651	0.928
CAV2	CALML3	0.055	0	0.800	0.691	0.936
CAV2	CALML5	0.055	0	0.800	0.691	0.936
CAV2	CALML6	0.045	0	0.800	0.682	0.933
CAV2	CAV1	0.794	0.829	0.900	0.985	0.999
CAV2	CAVIN1	0.339	0.091	0	0.878	0.920
CAV2	EGFR	0.122	0.742	0.800	0.558	0.977
CAV2	FYN	0.051	0.046	0.900	0.632	0.962
CAV2	SRC	0.051	0.295	0.900	0.630	0.971
CAVIN1	CAV1	0.391	0.642	0.400	0.997	0.999
CAVIN1	CAV2	0.339	0.091	0	0.878	0.920
CBL	ABL1	0.063	0.896	0.900	0.685	0.996
CBL	ARHGEF7	0.049	0.786	0.500	0.906	0.989
CBL	BCAR1	0.050	0.292	0	0.899	0.926
CBL	BLNK	0	0.292	0.900	0.573	0.967
CBL	CDC42	0.044	0.512	0.500	0.669	0.912
CBL	CRK	0.055	0.930	0.800	0.991	0.999
CBL	CRKL	0.063	0.993	0.800	0.992	0.999
CBL	CTNNB1	0.044	0.625	0.360	0.655	0.910
CBL	EGFR	0.042	0.996	0.900	0.994	0.999
CBL	ERBB2	0	0.800	0	0.734	0.944
[truncated: 24,991 more rows]
