# Supplementary material for: Understanding the SARS-CoV-2-Human Liver Interactome Using a Comprehensive Analysis of the Individual Virus-Host Interactions.
Source: Preprints.org preprint supplement (doi:10.20944/preprints202402.0757.v1), 2024-02-13
Supplement: Supplementary file 3 [file supplementary › Excel files/FILE 3 Comprehensive Interactions Data in Liver.xlsx]

## Sheet: Foglio1
Viral	Human
S	ACE2
E	ACTB				Liver proteins interacting with viral proteins during covid (626 human proteins out of 1111)
N	ACTB
ORF7b	ACTB
ORF8	ACTB				Comprehensive data from liver interactome computed by using BioGRID, STRING and Cytoscape.
ORF9c	ACTB
ORF10	ACTB				In red the 51 remaining of the original hub nodes
nsp1	ACTB
nsp4	ACTB
nsp8	ACTB
nsp14	ACTB
nsp3	ACTC1
nsp12	ACTL6A
ORF3b	ACTR2
ORF8	ACTR2
ORF10	ACTR2
nsp4	ACTR2
nsp5	ACTR2
nsp5	ACTR2
nsp7	ACTR2
nsp7	ACTR2
nsp15	ACTR2
ORF8	ACTR3
ORF9b	ACTR3
ORF9c	ACTR3
ORF10	ACTR3
S	ACTR3
nsp1	ACTR3
nsp3	ACTR3
nsp4	ACTR3
nsp6	ACTR3
nsp8	ACTR3
E	ADAM17
M	ADAM17
ORF3a	ADAM17
ORF3b	ADAM17
ORF7a	ADAM17
ORF7b	ADAM17
ORF8	ADAM17
ORF14	ADAM17
nsp4	ADAM17
nsp6	ADAM17
E	ADIPOR1
M	ADIPOR1
ORF3a	ADIPOR1
ORF3b	ADIPOR1
ORF7a	ADIPOR1
ORF7b	ADIPOR1
	ADIPOR1
nsp4	ADIPOR1
nsp6	ADIPOR1
	ADIPOR1
S	AGER
nsp7	AHR
nsp16	AHR
E	AHSA1
ORF6	AHSA1
ORF10	AHSA1
S	AHSA1
nsp3	AHSA1
nsp4	AHSA1
nsp6	AHSA1
nsp10	AHSA1
nsp13	AHSA1
ORF3b	AIMP1
ORF6	AIMP1
nsp4	AIP
nsp6	AIP
nsp12	AIP
nsp13	AIP
nsp14	AIP
nsp15	AIP
nsp16	AIP
nsp2	AKAP13
nsp2	AKT1
nsp11	AKT1
E	ALDOA
M	ALDOA
N	ALDOA
ORF3a	ALDOA
ORF3b	ALDOA
ORF6	ALDOA
ORF7a	ALDOA
ORF7b	ALDOA
ORF9b	ALDOA
ORF9c	ALDOA
nsp1	ALDOA
nsp4	ALDOA
nsp5	ALDOA
nsp6	ALDOA
nsp8	ALDOA
nsp9	ALDOA
nsp13	ALDOA
nsp14	ALDOA
ORF7b	ANAPC1
nsp7	ANAPC1
nsp12	ANAPC1
nsp14	ANAPC1
nsp16	ANAPC1
ORF8	ANAPC10
N	ANAPC16
nsp7	ANAPC16
nsp8	ANAPC16
nsp9	ANAPC16
nsp12	ANAPC16
nsp15	ANAPC16
nsp16	ANAPC16
nsp4	ANAPC2
M	ANAPC4
nsp12	ANAPC4
ORF6	ANAPC5
nsp7	ANAPC5
nsp16	ANAPC5
nsp7	ANAPC7
nsp8	ANAPC7
nsp12	ANAPC7
nsp15	ANLN
N	APC
ORF6	APC
ORF10	APC
nsp2	APC
nsp7	APC
nsp14	APC
nsp15	APC
nsp16	APC
M	APPL1
ORF3a	APPL1
ORF3b	APPL1
ORF6	APPL1
ORF7b	APPL1
nsp4	APPL1
ORF3a	AQR
ORF6	AQR
nsp7	AQR
E	ARHGAP1
M	ARHGAP1
ORF3b	ARHGAP1
ORF6	ARHGAP1
ORF7a	ARHGAP1
ORF7b	ARHGAP1
ORF8	ARHGAP1
S	ARHGAP1
nsp2	ARHGAP1
nsp4	ARHGAP1
nsp6	ARHGAP1
M	ARHGDIA
ORF3a	ARHGDIA
ORF7a	ARHGDIA
ORF7b	ARHGDIA
nsp4	ARHGDIA
nsp6	ARHGDIA
nsp8	ARHGDIA
nsp9	ARHGEF12
ORF7b	ARHGEF2
nsp9	ARHGEF2
nsp15	ARHGEF2
M	ARHGEF7
nsp9	ARHGEF7
nsp10	ARID1A
nsp10	ARID1B
nsp16	ARID1B
nsp10	ARID2
nsp11	ARID2
nsp7	ARNT
nsp3	ARNT2
nsp5	ARNT2
nsp7	ARNT2
nsp10	ARNT2
nsp14	ARNT2
nsp16	ARNT2
nsp14	ARRB2
nsp3	ATF3
E	ATF6
M	ATF6
ORF3a	ATF6
ORF7a	ATF6
ORF7b	ATF6
nsp3	ATF6
nsp4	ATF6
nsp6	ATF6
N	ATM
ORF7a	ATM
ORF7a	ATR
nsp8	ATR
nsp11	ATRIP
nsp11	ATRIP
nsp4	ATRN
nsp6	ATRN
ORF14	ATRX
nsp10	ATRX
nsp15	ATRX
ORF8	AURKB
nsp9	BABAM1
M	BAG2
N	BAG2
ORF8	BAG2
ORF10	BAG2
S	BAG2
nsp2	BAG2
nsp3	BAG2
nsp4	BAG2
nsp7	BAG2
nsp12	BAG2
nsp14	BAG2
nsp15	BAG2
nsp16	BAG2
nsp2	BAG3
nsp11	BAG3
nsp13	BAG3
nsp14	BAG3
ORF3a	BAIAP2
nsp2	BAIAP2
nsp3	BAIAP2
nsp14	BAIAP2
nsp4	BCAP31
nsp6	BCAP31
nsp15	BCAR1
N	BCAS2
ORF10	BCL9
N	BMS1
N	BMS1
ORF6	BMS1
ORF14	BMS1
ORF14	BMS1
nsp5	BRCA1
E	BRD4
nsp11	BRD7
nsp4	BRI3BP
nsp6	BRI3BP
nsp15	BRIP1
nsp7	BUB1
nsp2	BUB1B
nsp3	BUB1B
nsp7	BUB1B
nsp8	BUB1B
nsp13	BUB1B
E	BUB3
M	BUB3
ORF3a	BUB3
ORF3b	BUB3
ORF6	BUB3
ORF7a	BUB3
ORF7b	BUB3
S	BUB3
nsp1	BUB3
nsp4	BUB3
nsp5	BUB3
nsp6	BUB3
nsp13	BUB3
nsp14	BUB3
M	BYSL
N	BYSL
nsp14	C3
nsp15	CACYBP
nsp15	CACYBP
ORF9c	CALM3
nsp9	CALM3
E	CALR
ORF3a	CALR
ORF6	CALR
ORF7a	CALR
ORF7b	CALR
ORF8	CALR
ORF9c	CALR
ORF10	CALR
S	CALR
nsp4	CALR
nsp6	CALR
nsp16	CARD9
M	CARM1
nsp4	CARM1
nsp5	CARM1
nsp6	CARM1
nsp10	CARM1
ORF9b	CARS2
N	CASC3
ORF10	CASP3
nsp13	CASP3
nsp14	CASP3
nsp2	CASP8
M	CAV1
ORF3b	CAV1
ORF6	CAV1
S	CAV1
nsp6	CAV1
nsp6	CAV1
M	CAV2
ORF7b	CAV2
nsp6	CAV2
N	CBL
S	CBL
nsp2	CBL
nsp11	CBL
nsp13	CBL
nsp14	CBL
ORF8	CCAR2
nsp7	CCAR2
nsp16	CCAR2
ORF6	CCNA2
nsp3	CCNB1
nsp13	CCNB1
nsp3	CCNB2
nsp4	CCNB2
nsp7	CCND1
nsp9	CCND2
E	CCND3
nsp6	CD40
nsp4	CD47
nsp6	CD47
N	CDC16
ORF10	CDC20
nsp13	CDC20
nsp12	CDC23
nsp16	CDC23
nsp7	CDC25C
nsp12	CDC27
N	CDC37
nsp2	CDC37
nsp9	CDC37
nsp14	CDC37
nsp16	CDC37
E	CDC42
M	CDC42
ORF3a	CDC42
ORF3a	CDC42
ORF6	CDC42
ORF7a	CDC42
ORF7b	CDC42
S	CDC42
nsp3	CDC42
nsp4	CDC42
nsp5	CDC42
nsp6	CDC42
nsp9	CDC42
nsp12	CDC42
nsp13	CDC42
nsp14	CDC42
ORF10	CDC5L
nsp15	CDC5L
N	CDC73
nsp7	CDC73
M	CDH1
ORF7b	CDH1
S	CDH1
ORF3a	CDH17
S	CDH17
M	CDH2
ORF7b	CDH2
ORF8	CDH2
S	CDH2
nsp1	CDH2
ORF6	CDK1
nsp1	CDK1
nsp4	CDK1
nsp9	CDK1
nsp13	CDK2
nsp10	CDK4
nsp16	CDT1
ORF14	CENPC
nsp15	CENPE
nsp11	CENPF
nsp13	CENPF
nsp14	CENPF
nsp16	CENPF
N	CENPH
ORF6	CENPH
nsp7	CENPH
ORF8	CENPI
nsp9	CENPM
ORF6	CEP152
nsp7	CEP152
nsp14	CEP152
nsp7	CEP192
nsp12	CEP192
nsp13	CEP192
nsp14	CEP192
nsp16	CEP192
ORF6	CEP55
nsp2	CEP55
nsp7	CEP55
nsp13	CEP55
nsp15	CEP55
nsp16	CEP55
ORF6	CFL1
ORF7b	CFL1
ORF8	CFL1
ORF9c	CFL1
ORF10	CFL1
S	CFL1
nsp3	CFL1
nsp13	CHUK
nsp15	CKS2
ORF9b	CLSPN
ORF14	CLSPN
nsp5	CLSPN
nsp7	CLSPN
nsp9	CLSPN
nsp10	CLSPN
nsp15	CLSPN
nsp16	CLSPN
ORF8	COL18A1
nsp3	COL18A1
nsp9	COL2A1
ORF9c	COL3A1
ORF6	COMMD1
nsp16	COMMD1
N	CRK
ORF6	CRKL
ORF7a	CRKL
nsp11	CRKL
nsp12	CRKL
nsp13	CRKL
nsp14	CRKL
nsp15	CRKL
nsp16	CRKL
M	CSNK1A1
ORF3a	CSNK1A1
ORF8	CSNK1A1
E	CTBP1
M	CTBP1
ORF7a	CTBP1
ORF9b	CTBP1
ORF10	CTBP1
S	CTBP1
nsp2	CTBP1
ORF7b	CTNNA1
S	CTNNA1
nsp1	CTNNA1
nsp4	CTNNA1
nsp9	CTNNA1
nsp15	CTNNBIP1
N	CTR9
ORF14	CTR9
nsp5	CTR9
nsp9	CTR9
M	CUL1
nsp4	CUL1
nsp6	CUL1
M	CUL2
ORF7b	CUL2
ORF10	CUL2
nsp3	CUL2
nsp4	CUL2
nsp6	CUL2
ORF8	CXCL5
nsp2	CYLD
nsp6	CYLD
nsp12	CYLD
nsp14	CYLD
nsp16	CYLD
E	DARS
M	DARS
ORF3a	DARS
ORF3b	DARS
ORF6	DARS
ORF7a	DARS
ORF7b	DARS
ORF8	DARS
S	DARS
ORF8	DCAF13
ORF14	DCAF13
nsp3	DCAF13
M	DDX58
N	DDX58
ORF6	DDX58
ORF9b	DDX58
nsp2	DDX58
nsp5	DDX58
nsp5	DDX58
nsp5	DDX58
ORF6	DHX15
nsp1	DHX15
N	DHX8
ORF3a	DHX8
ORF9b	DHX8
nsp7	DHX8
nsp16	DHX8
M	DIMT1
N	DIMT1
nsp4	DIMT1
nsp6	DIMT1
nsp8	DIMT1
E	DKC1
N	DKC1
ORF9b	DKC1
ORF9c	DKC1
ORF14	DKC1
S	DKC1
nsp1	DKC1
nsp2	DLGAP5
nsp15	DLGAP5
nsp15	DLGAP5
nsp9	DMAP1
E	DNAJB1
M	DNAJB1
ORF6	DNAJB1
nsp15	DNAJB1
ORF7b	DNAJC10
ORF8	DNAJC10
nsp2	DNAJC10
nsp3	DNAJC10
nsp4	DNAJC10
nsp4	DNAJC3
nsp14	DNAJC5
E	DNMT1
ORF8	DNMT1
nsp16	DNMT1
ORF3a	DPF2
M	DPM1
ORF3a	DPM1
ORF6	DPM1
S	DPP4
ORF3a	EEA1
ORF3a	EEF1E1
ORF9b	EEF1E1
ORF10	EEF1E1
nsp5	EEF1E1
nsp13	EEF1E1
E	EEF2
ORF3a	EEF2
ORF6	EEF2
ORF7b	EEF2
ORF9c	EEF2
nsp1	EEF2
nsp8	EEF2
nsp9	EEF2
nsp12	EEF2
nsp14	EEF2
nsp15	EEF2
M	EGFR
ORF3a	EGFR
ORF7b	EGFR
S	EGFR
nsp4	EGFR
nsp14	EGLN1
E	EIF2AK3
M	EIF2AK3
ORF6	EIF2AK3
ORF7a	EIF2AK3
ORF7b	EIF2AK3
ORF8	EIF2AK3
S	EIF2AK3
nsp4	EIF2AK3
nsp6	EIF2AK3
E	EIF2S1
M	EIF2S1
ORF3a	EIF2S1
ORF3b	EIF2S1
ORF6	EIF2S1
ORF7a	EIF2S1
ORF7b	EIF2S1
ORF8	EIF2S1
ORF9b	EIF2S1
ORF10	EIF2S1
S	EIF2S1
nsp1	EIF2S1
nsp3	EIF2S1
nsp4	EIF2S1
nsp5	EIF2S1
nsp6	EIF2S1
nsp13	EIF2S1
nsp14	EIF2S1
M	EIF3B
ORF3a	EIF3B
ORF6	EIF3B
ORF7a	EIF3B
ORF7b	EIF3B
nsp1	EIF3B
nsp4	EIF3B
nsp6	EIF3B
nsp9	EIF3B
E	EIF4A3
M	EIF4A3
ORF6	EIF4A3
ORF7b	EIF4A3
ORF8	EIF4A3
ORF10	EIF4A3
S	EIF4A3
nsp4	EIF4A3
nsp6	EIF4A3
E	EIF6
M	EIF6
ORF3a	EIF6
ORF3b	EIF6
ORF6	EIF6
ORF7a	EIF6
ORF7b	EIF6
ORF9b	EIF6
nsp4	EIF6
nsp6	EIF6
nsp13	EIF6
nsp14	EIF6
nsp11	EP300
nsp12	EPRS1
ORF9c	EPRS1
M	ERBB2
ORF3a	ERBB2
ORF7a	ERBB2
ORF7b	ERBB2
S	ERBB2
nsp4	ERBB2
ORF7b	ERBB4
E	ERC1
ORF6	ERC1
nsp7	ERC1
nsp13	ERC1
nsp16	ERC1
nsp2	EREG
M	ERN1
ORF7a	ERN1
ORF7b	ERN1
ORF8	ERN1
ORF14	ERN1
nsp4	ERN1
nsp6	ERN1
ORF10	8
S	ESR1
ORF14	ESRRA
nsp11	ESRRA
nsp5	FAM83D
M	FANCD2
ORF7a	FANCD2
ORF7b	FAS
N	FAU
ORF3b	FAU
ORF6	FAU
ORF8	FAU
ORF10	FAU
S	FAU
nsp3	FAU
nsp8	FAU
nsp9	FAU
M	FBXO22
nsp6	FBXO22
ORF7b	FBXO38
ORF6	FBXO45
nsp12	FBXO45
N	FBXO5
nsp7	FBXO5
nsp15	FBXO5
M	FBXW11
S	FKBP4
nsp4	FKBP4
nsp12	FKBP4
nsp14	FKBP4
nsp15	FKBP4
nsp16	FKBP4
nsp16	FKBP5
ORF6	FLNA
ORF7b	FLNA
ORF9c	FLNA
S	FLNA
nsp6	FN1
M	GAB1
ORF3a	GAB1
E	GAPDH
M	GAPDH
ORF8	GAPDH
ORF9c	GAPDH
ORF10	GAPDH
S	GAPDH
nsp4	GAPDH
nsp6	GAPDH
nsp13	GAPDH
M	GDI2
ORF3b	GDI2
ORF6	GDI2
ORF7b	GDI2
S	GDI2
nsp4	GDI2
nsp6	GDI2
ORF3a	GET4
ORF6	GET4
ORF7b	GET4
nsp3	GET4
nsp4	GET4
M	GIT2
M	GJA1
ORF3b	GJA1
ORF7a	GJA1
ORF7b	GJA1
ORF14	GJA1
nsp4	GJA1
nsp6	GJA1
E	GRPEL1
M	GRPEL1
ORF3a	GRPEL1
ORF3b	GRPEL1
ORF6	GRPEL1
ORF7a	GRPEL1
ORF7b	GRPEL1
ORF8	GRPEL1
ORF10	GRPEL1
S	GRPEL1
nsp10	GRPEL1
N	GSK3B
nsp9	GTF2F1
nsp15	GTF2F1
nsp9	GTF2F2
nsp3	GTSE1
nsp5	HDAC2
M	HGS
ORF3a	HGS
ORF3b	HGS
ORF7a	HGS
ORF7b	HGS
S	HGS
nsp4	HGS
nsp13	HGS
nsp14	HGS
nsp15	HGS
nsp16	HGS
nsp7	HJURP
ORF9c	HMGB1
S	HMGB1
N	HNRNPA1
ORF6	HNRNPA1
ORF7b	HNRNPA1
ORF8	HNRNPA1
ORF9c	HNRNPA1
ORF10	HNRNPA1
S	HNRNPA1
N	HNRNPA2B1
ORF9c	HNRNPA2B1
E	HNRNPC
M	HNRNPC
N	HNRNPC
ORF9c	HNRNPC
nsp1	HNRNPC
nsp9	HNRNPC
ORF6	HSP90AA1
ORF7b	HSP90AA1
ORF9c	HSP90AA1
nsp9	HSP90AA1
nsp12	HSP90AA1
nsp15	HSP90AA1
nsp16	HSP90AA1
N	HSP90AB1
ORF6	HSP90AB1
ORF9c	HSP90AB1
nsp9	HSP90AB1
nsp12	HSP90AB1
nsp15	HSP90AB1
E	HSPA4
M	HSPA4
N	HSPA4
ORF7a	HSPA4
ORF10	HSPA4
S	HSPA4
nsp4	HSPA4
nsp6	HSPA4
nsp12	HSPA4
nsp15	HSPA4
E	HSPA5
N	HSPA5
ORF6	HSPA5
ORF7a	HSPA5
ORF8	HSPA5
ORF9c	HSPA5
S	HSPA5
nsp4	HSPA5
nsp12	HSPA5
nsp14	HSPA5
E	HSPA8
M	HSPA8
N	HSPA8
ORF9b	HSPA8
ORF9c	HSPA8
S	HSPA8
nsp4	HSPA8
nsp9	HSPA8
nsp12	HSPA8
nsp14	HSPA8
E	HSPA9
N	HSPA9
ORF9b	HSPA9
nsp1	HSPA9
nsp12	HSPA9
nsp11	HSPB1
nsp13	HSPB1
M	HSPBP1
N	HSPBP1
E	HSPD1
M	HSPD1
ORF9b	HSPD1
ORF9c	HSPD1
nsp12	HSPD1
nsp13	HSPD1
nsp14	HSPD1
nsp16	HSPD1
E	HSPE1
M	HSPE1
ORF7a	HSPE1
ORF9c	HSPE1
nsp8	HSPE1
nsp12	HSPE1
E	HYOU1
M	HYOU1
ORF3a	HYOU1
ORF3b	HYOU1
ORF6	HYOU1
ORF7a	HYOU1
ORF8	HYOU1
ORF10	HYOU1
S	HYOU1
nsp2	HYOU1
nsp3	HYOU1
nsp4	HYOU1
nsp2	IARS2
nsp3	IARS2
nsp5	IARS2
nsp6	IARS2
nsp9	IARS2
nsp13	IARS2
nsp14	IARS2
nsp16	IARS2
E	IFNGR1
ORF3a	IFNGR1
ORF3b	IFNGR1
ORF7a	IFNGR1
ORF7b	IFNGR1
nsp4	IFNGR1
nsp6	IFNGR1
ORF7a	IKBKG
ORF9b	IKBKG
nsp5	IKBKG
nsp6	IKBKG
nsp14	IKBKG
nsp14	IKBKG
ORF3a	IL10RB
ORF7b	IL10RB
S	IL12RB1
ORF3a	IL13RA1
ORF7b	IL13RA1
M	IL1RAP
ORF7b	IL1RAP
nsp6	IL27RA
nsp6	IL27RA
M	IL6ST
ORF3a	IL6ST
ORF7a	IL6ST
ORF7b	IL6ST
nsp4	IL6ST
nsp6	IL6ST
ORF7a	INTS5
ORF6	INTS6
M	IQGAP1
N	IQGAP1
ORF3a	IQGAP1
ORF6	IQGAP1
ORF7b	IQGAP1
ORF8	IQGAP1
ORF10	IQGAP1
nsp2	IQGAP1
nsp4	IQGAP1
M	IQGAP2
N	IQGAP2
M	IRAK1
nsp13	IRAK1
nsp9	IRS1
nsp5	IRS2
nsp9	IRS2
nsp4	ITGA3
nsp6	ITGA3
nsp13	ITGA3
nsp4	ITGA5
ORF3b	ITGAV
ORF7a	ITGAV
ORF7b	ITGAV
ORF8	ITGAV
ORF9c	ITGAV
S	ITGAV
nsp4	ITGAV
nsp14	ITSN1
nsp9	IWS1
M	JAG1
ORF3a	JAG1
ORF3b	JAG1
ORF7a	JAG1
ORF7b	JAG1
S	JAG1
nsp4	JAG1
nsp6	JAG1
E	JAG2
M	JAG2
ORF7a	JAG2
ORF7b	JAG2
nsp4	JAG2
M	JAK1
ORF3a	JAK1
ORF3b	JAK1
ORF6	JAK1
ORF7a	JAK1
ORF7b	JAK1
nsp7	JAK1
M	JAK2
nsp3	JUN
nsp12	JUN
nsp13	JUN
nsp14	JUN
nsp3	JUND
E	KARS
M	KARS
ORF3a	KARS
ORF3b	KARS
ORF6	KARS
ORF7a	KARS
ORF7b	KARS
ORF8	KARS
ORF9b	KARS
ORF10	KARS
ORF6	KIF11
S	KIF18A
ORF14	KIF18B
ORF6	KIF20A
ORF7b	KIF20A
nsp7	KIF20A
ORF10	KIF23
nsp15	KIF4A
ORF3a	KRAS
N	KRI1
ORF14	KRI1
nsp2	KRI1
N	LEO1
nsp11	LEO1
ORF3b	LIMA1
ORF6	LIMA1
ORF3a	LTBR
ORF7b	LTBR
N	LTV1
nsp6	LY6E
nsp13	MAD1L1
nsp14	MAD1L1
E	MAD2L1
ORF7a	MAD2L1
ORF7b	MAD2L1
nsp1	MAD2L1
nsp4	MAD2L1
nsp1	MAGOH
ORF7b	MAML1
nsp15	MAML1
nsp16	MAML1
nsp4	MAP2K1
M	MAP2K3
N	MAP3K7
ORF6	MAP3K7
ORF7a	MAP3K7
nsp6	MAP3K7
nsp12	MAP3K7
ORF3a	MAPK1
ORF8	MAPK1
ORF14	MAPK1
ORF8	MAPK3
ORF9c	MAPK3
nsp11	MAPK3
nsp16	MAPK9
M	MAPKAP1
S	MAPKAP1
nsp4	MAPKAP1
nsp7	MAPKAP1
nsp9	MAPKAPK2
nsp1	MARS
ORF9c	MARS1
ORF3b	MCAM
ORF7b	MCAM
S	MCAM
N	MCM2
ORF10	MCM2
S	MCM2
nsp2	MCM2
E	MCM4
ORF9b	MCM4
S	MCM4
nsp1	MCM4
nsp5	MCM4
nsp7	MCM4
nsp8	MCM4
nsp9	MCM4
E	MCM5
M	MCM5
ORF3a	MCM5
ORF3b	MCM5
ORF6	MCM5
ORF7a	MCM5
ORF7b	MCM5
ORF8	MCM5
ORF9b	MCM5
ORF9c	MCM5
ORF10	MCM5
ORF14	MCM5
S	MCM5
nsp4	MCM5
nsp5	MCM5
nsp6	MCM5
nsp13	MCM5
nsp14	MCM5
nsp2	MCM6
ORF9b	MCM7
ORF9c	MCM7
S	MCM7
nsp1	MCM7
nsp3	MCM7
nsp5	MCM7
nsp6	MCM7
nsp7	MCM7
nsp8	MCM7
nsp9	MCM7
nsp10	MCM7
nsp12	MCM7
ORF7b	MDC1
ORF9c	MDC1
ORF10	MDC1
ORF14	MDC1
nsp5	MDC1
nsp11	MDC1
nsp15	MDC1
nsp11	MDM2
S	MED1
nsp11	MED1
ORF14	MED12
nsp5	MED14
ORF3b	MED15
nsp5	MED17
nsp5	MED23
nsp16	MED23
nsp15	MED27
nsp5	MED4
nsp5	MED8
E	MET
M	MET
ORF3a	MET
ORF3b	MET
ORF7a	MET
ORF7b	MET
ORF8	MET
S	MET
nsp4	MET
nsp6	MET
nsp9	MET
nsp16	MFAP1
ORF14	MKI67
nsp2	MKI67
nsp3	MKI67
nsp11	MKI67
nsp15	MKI67
ORF9b	MLKL
E	MRPL12
ORF7a	MRPL12
ORF7b	MRPL12
ORF10	MRPL12
nsp2	MRPL12
nsp15	MRPL12
N	MRPL17
ORF8	MRPL20
ORF9b	MRPL20
nsp4	MRPL20
N	MRPL32
N	MRPL9
ORF9b	MRPL9
ORF9b	MRPS16
ORF9b	MRPS9
nsp2	MRPS9
nsp16	MRPS9
nsp13	MSH2
nsp5	MSH3
nsp11	MSH3
nsp12	MSH3
nsp13	MSH3
nsp15	MSH3
ORF6	MSH6
nsp8	MSH6
nsp10	MSH6
nsp13	MSH6
ORF9c	MT1A
nsp13	MVB12A
M	NARS1
ORF3a	NARS1
ORF7b	NARS1
ORF10	NARS1
M	NAT10
N	NAT10
ORF3a	NAT10
ORF7a	NAT10
ORF7b	NAT10
ORF14	NAT10
nsp1	NAT10
nsp4	NAT10
nsp6	NAT10
nsp13	NAT10
nsp14	NAT10
ORF3a	NBN
nsp1	NBN
nsp4	NBN
nsp9	NBN
nsp10	NBN
nsp15	NBN
ORF9c	NCAPD2
ORF10	NCAPD2
nsp4	NCAPD2
nsp6	NCAPD2
nsp7	NCAPD2
nsp11	NCAPG
nsp7	NCAPH
M	NCAPH2
ORF7b	NCOA3
nsp7	NCOA3
nsp14	NCOA3
nsp11	NCOR1
nsp2	NDC80
nsp7	NDC80
nsp16	NDC80
S	NEK7
nsp2	NEK7
nsp4	NEK7
nsp7	NEK7
nsp12	NEK7
nsp16	NFKB1
nsp16	NFKB1
ORF8	NFKB2
E	NHP2
N	NHP2
ORF7a	NHP2
nsp15	NHP2
ORF8	NLRP3
ORF10	NOB1
nsp1	NOB1
nsp3	NOB1
nsp13	NOB1
N	NOC4L
ORF14	NOC4L
ORF14	NOL6
N	NOP10
ORF3a	NOTCH1
ORF3b	NOTCH1
ORF7b	NOTCH1
S	NOTCH1
nsp4	NOTCH1
nsp5	NOTCH1
ORF3a	NRG1
ORF7b	NRG1
ORF9c	NRG1
N	NRIP1
nsp7	NRIP1
nsp16	NRIP1
M	NRP1
ORF3a	NRP1
ORF7b	NRP1
S	NRP1
nsp4	NRP1
nsp6	NRP1
E	NUP155
M	NUP155
ORF6	NUP155
ORF7a	NUP155
ORF7b	NUP155
ORF9b	NUP155
S	NUP155
nsp4	NUP155
nsp6	NUP155
nsp8	NUP155
ORF6	NUP214
nsp3	NUP214
nsp9	NUP214
nsp14	NUP214
nsp15	NUP214
nsp16	NUP214
ORF6	NUP54
nsp7	NUP54
nsp9	NUP54
M	NUP98
ORF6	NUP98
ORF7b	NUP98
nsp4	NUP98
nsp6	NUP98
nsp16	NUP98
ORF10	NUSAP1
nsp3	NUSAP1
nsp13	NUSAP1
ORF8	OASL
nsp9	ORC1
ORF7b	ORC5
M	PA2G4
ORF7a	PA2G4
nsp4	PA2G4
N	PAF1
nsp9	PAF1
M	PAG1
N	PAK1IP1
M	PAK2
nsp9	PAK2
M	PAK4
ORF3a	PAK4
E	PARD3
M	PARD3
ORF3a	PARD3
nsp9	PARD3
M	PARD6B
ORF10	PBRM1
ORF8	PDGFD
M	PFN1
ORF3a	PFN1
nsp4	PFN1
nsp6	PFN1
nsp11	PFN1
nsp13	PFN1
nsp14	PFN1
ORF9c	PGK1
nsp6	PGK1
nsp13	PGK1
ORF3a	PGK2
nsp3	PGK2
M	PIK3CB
S	PIK3CB
M	PIK3R1
ORF7b	PIK3R1
ORF3b	PIK3R2
M	PIK3R3
S	PIK3R3
nsp3	PIK3R3
ORF8	PLAT
nsp2	PLAT
ORF8	PLAU
N	PLK1
ORF6	PLK1
nsp6	PML
nsp6	PML
nsp1	PNO1
nsp8	PNO1
ORF10	POLR1A
N	POLR1E
ORF14	POLR1E
ORF10	POLR2A
nsp15	POLR2A
ORF9b	POLR2B
ORF10	POLR2B
nsp7	POLR2B
nsp8	POLR2B
nsp15	POLR2B
nsp16	POLR2B
ORF9b	POLR2C
nsp9	POLR2C
nsp12	POLR2E
nsp7	POLR2L
nsp12	POLR2L
ORF9b	POLR3A
nsp7	POLR3A
nsp8	POLR3A
ORF10	POLR3B
nsp16	PPARA
nsp16	PPARA
nsp12	PPID
nsp16	PPP1R13L
nsp16	PPP1R13L
S	PRC1
M	PRKCI
ORF3a	PRKCI
ORF7a	PRKCI
S	PRKCI
nsp4	PRKCI
M	PRPF19
ORF3a	PRPF19
ORF7a	PRPF19
ORF7b	PRPF19
nsp4	PRPF19
nsp6	PRPF19
nsp13	PRPF19
N	PRPF3
ORF6	PRPF31
nsp3	PRPF31
nsp11	PRPF31
nsp16	PRPF31
ORF7b	PSEN1
ORF3b	PSMA2
ORF6	PSMA2
S	PSMA2
ORF3b	PSMA3
ORF6	PSMA3
nsp2	PSMA3
nsp4	PSMA3
nsp7	PSMA3
nsp10	PSMA3
nsp12	PSMA3
ORF6	PSMA4
ORF3b	PSMA5
ORF6	PSMA5
S	PSMA5
ORF3b	PSMA6
ORF6	PSMA6
nsp2	PSMA6
nsp6	PSMA6
ORF6	PSMA7
N	PSMA8
ORF3b	PSMB1
ORF6	PSMB1
ORF6	PSMB2
ORF3b	PSMB4
ORF6	PSMB4
nsp6	PSMB4
nsp15	PSMB4
M	PSMB6
ORF3b	PSMB6
ORF6	PSMB6
nsp6	PSMB6
M	PSMB7
ORF6	PSMB7
nsp6	PSMB7
E	PSMC1
M	PSMC1
ORF3a	PSMC1
ORF3b	PSMC1
ORF6	PSMC1
ORF7a	PSMC1
ORF7b	PSMC1
ORF8	PSMC1
ORF9b	PSMC1
S	PSMC1
nsp4	PSMC1
nsp6	PSMC1
nsp8	PSMC1
nsp9	PSMC1
nsp13	PSMC1
ORF6	PSMC4
ORF9c	PSMC4
nsp3	PSMC4
nsp8	PSMC4
nsp13	PSMC4
nsp16	PSMC4
ORF6	PSMC5
ORF10	PSMC5
nsp2	PSMC5
nsp13	PSMC5
nsp16	PSMC5
E	PSMD1
ORF6	PSMD1
ORF7a	PSMD1
nsp4	PSMD1
nsp6	PSMD1
nsp13	PSMD1
ORF6	PSMD11
ORF7b	PSMD11
ORF9c	PSMD11
nsp13	PSMD11
ORF6	PSMD12
ORF9c	PSMD12
nsp13	PSMD12
nsp16	PSMD12
M	PSMD2
ORF6	PSMD2
ORF7a	PSMD2
ORF7b	PSMD2
ORF9b	PSMD2
S	PSMD2
nsp4	PSMD2
nsp6	PSMD2
nsp8	PSMD2
M	PSMD3
ORF3a	PSMD3
ORF7a	PSMD3
ORF7b	PSMD3
ORF9b	PSMD3
nsp4	PSMD3
nsp5	PSMD3
nsp6	PSMD3
nsp13	PSMD3
E	PSMD4
M	PSMD4
ORF6	PSMD4
ORF7a	PSMD4
nsp3	PSMD4
nsp4	PSMD4
nsp6	PSMD4
M	PSMD6
ORF6	PSMD7
ORF9b	PSMD7
ORF9c	PSMD7
nsp8	PSMD7
M	PSMD8
N	PSMD8
ORF6	PSMD8
nsp5	PSMD8
nsp13	PSMD8
M	PTGES
ORF7b	PTGES
E	PTGES3
M	PTGES3
ORF6	PTGES3
ORF7b	PTGES3
ORF9b	PTGES3
ORF10	PTGES3
nsp4	PTGES3
nsp8	PTGES3
nsp12	PTGES3
nsp14	PTGES3
nsp15	PTGES3
nsp16	PTGES3
ORF3a	PTPN11
ORF7b	PTPN11
nsp13	PTTG1
N	PTX3
ORF6	QARS
ORF7b	QARS
ORF8	QARS
ORF9b	QARS
ORF10	QARS
S	QARS
nsp2	RAB4A
ORF3a	RAB5A
ORF7b	RAB5A
ORF3a	RAB5B
ORF3a	RABEP1
ORF6	RABEP1
nsp5	RABEP1
nsp13	RABEP1
ORF3b	RABGEF1
ORF7a	RABGEF1
nsp13	RABGEF1
nsp14	RABGEF1
E	RAC1
M	RAC1
ORF3a	RAC1
ORF3b	RAC1
ORF6	RAC1
ORF7a	RAC1
ORF7b	RAC1
ORF8	RAC1
ORF9c	RAC1
S	RAC1
nsp4	RAC1
nsp6	RAC1
nsp13	RAC1
nsp1	RACGAP1
nsp16	RACGAP1
N	RAD23B
ORF3a	RAD23B
ORF3b	RAD23B
ORF6	RAD23B
ORF7a	RAD23B
ORF8	RAD23B
ORF14	RAD23B
M	RALA
ORF3a	RALA
ORF7b	RALA
ORF10	RALA
nsp7	RALA
nsp8	RALA
nsp9	RALA
ORF6	RANBP2
ORF6	RANGAP1
M	RAP1A
ORF3a	RAP1A
ORF3b	RAP1A
ORF7a	RAP1A
ORF7b	RAP1A
ORF9b	RAP1A
ORF9c	RAP1A
ORF10	RAP1A
nsp6	RAP1A
ORF9b	RARS2
nsp6	RARS2
nsp8	RARS2
M	RB1
nsp5	RB1
ORF9b	RBBP4
nsp8	RBBP4
nsp9	RBBP4
M	RBSN
N	RBSN
ORF3a	RBSN
ORF3b	RBSN
nsp2	RBSN
nsp4	RBSN
nsp7	RBSN
nsp12	RBSN
ORF10	RBX1
nsp9	REL
nsp14	REL
nsp16	REL
M	RHEB
ORF3a	RHEB
E	RHOA
M	RHOA
ORF8	RHOA
ORF10	RHOA
S	RHOA
nsp3	RHOA
nsp6	RHOA
nsp7	RHOA
nsp8	RHOA
nsp15	RHOA
M	RICTOR
N	RICTOR
S	RICTOR
nsp2	RIPK1
nsp12	RIPK1
nsp15	RIPK1
nsp7	RNF8
nsp13	RNF8
M	ROCK1
S	ROCK1
nsp2	ROCK1
M	RPL10A
N	RPL10A
ORF6	RPL10A
ORF9c	RPL10A
nsp4	RPL10A
nsp6	RPL10A
M	RPL11
N	RPL11
ORF6	RPL11
ORF7a	RPL11
nsp1	RPL11
nsp4	RPL11
nsp6	RPL11
nsp12	RPL11
E	RPL12
M	RPL12
ORF3a	RPL12
ORF6	RPL12
ORF7a	RPL12
ORF7b	RPL12
ORF9c	RPL12
nsp4	RPL12
nsp5	RPL12
nsp6	RPL12
nsp8	RPL12
nsp9	RPL12
nsp13	RPL12
E	RPL13
M	RPL13
N	RPL13
ORF3a	RPL13
ORF3b	RPL13
ORF6	RPL13
ORF7a	RPL13
ORF7b	RPL13
ORF8	RPL13
ORF9c	RPL13
ORF10	RPL13
ORF14	RPL13
nsp3	RPL13
nsp4	RPL13
nsp5	RPL13
nsp6	RPL13
nsp8	RPL13
nsp13	RPL13
nsp14	RPL13
E	RPL13A
M	RPL13A
N	RPL13A
ORF3a	RPL13A
ORF7a	RPL13A
ORF7b	RPL13A
ORF9c	RPL13A
S	RPL13A
nsp1	RPL13A
nsp4	RPL13A
nsp4	RPL13A
nsp5	RPL13A
nsp6	RPL13A
nsp8	RPL13A
nsp9	RPL13A
nsp13	RPL13A
N	RPL14
ORF6	RPL14
ORF7b	RPL14
ORF9c	RPL14
nsp2	RPL14
nsp6	RPL14
M	RPL15
N	RPL15
ORF6	RPL15
ORF9b	RPL15
ORF9c	RPL15
nsp4	RPL15
nsp5	RPL15
nsp6	RPL15
nsp13	RPL15
N	RPL17
ORF1ab	RPL17
M	RPL18
N	RPL18
ORF3a	RPL18
ORF7a	RPL18
ORF9b	RPL18
ORF9c	RPL18
nsp4	RPL18
nsp5	RPL18
nsp6	RPL18
nsp13	RPL18
E	RPL18A
M	RPL18A
N	RPL18A
ORF1ab	RPL18A
ORF3a	RPL18A
ORF3b	RPL18A
ORF6	RPL18A
ORF7a	RPL18A
ORF7b	RPL18A
ORF8	RPL18A
ORF9c	RPL18A
S	RPL18A
nsp3	RPL18A
nsp4	RPL18A
nsp5	RPL18A
nsp6	RPL18A
nsp8	RPL18A
nsp12	RPL18A
nsp13	RPL18A
nsp14	RPL18A
N	RPL19
ORF8	RPL19
ORF9c	RPL19
nsp2	RPL19
nsp11	RPL19
E	RPL21
M	RPL21
N	RPL21
ORF1ab	RPL21
ORF3a	RPL21
ORF3b	RPL21
ORF6	RPL21
ORF7a	RPL21
ORF7b	RPL21
ORF8	RPL21
nsp3	RPL21
nsp4	RPL21
nsp5	RPL21
nsp6	RPL21
nsp13	RPL21
nsp14	RPL21
M	RPL22
N	RPL22
ORF3a	RPL22
ORF9c	RPL22
nsp4	RPL22
nsp6	RPL22
nsp13	RPL22
E	RPL23
N	RPL23
ORF3a	RPL23
ORF6	RPL23
ORF7a	RPL23
ORF7b	RPL23
S	RPL23
nsp4	RPL23
nsp5	RPL23
nsp6	RPL23
nsp13	RPL23
M	RPL23A
N	RPL23A
ORF6	RPL23A
nsp4	RPL23A
nsp6	RPL23A
nsp15	RPL23A
N	RPL24
ORF1ab	RPL24
ORF6	RPL24
E	RPL26
M	RPL26
N	RPL26
ORF1ab	RPL26
ORF3a	RPL26
ORF6	RPL26
ORF7a	RPL26
ORF7b	RPL26
ORF8	RPL26
ORF9c	RPL26
nsp4	RPL26
nsp5	RPL26
nsp6	RPL26
nsp13	RPL26
nsp14	RPL26
E	RPL27
M	RPL27
N	RPL27
ORF3a	RPL27
ORF6	RPL27
ORF7a	RPL27
ORF7b	RPL27
ORF9c	RPL27
nsp4	RPL27
nsp5	RPL27
nsp6	RPL27
nsp13	RPL27
E	RPL27A
M	RPL27A
N	RPL27A
ORF3a	RPL27A
ORF6	RPL27A
ORF7a	RPL27A
ORF7b	RPL27A
ORF9c	RPL27A
nsp4	RPL27A
nsp5	RPL27A
nsp6	RPL27A
nsp13	RPL27A
nsp14	RPL27A
E	RPL29
N	RPL29
ORF1ab	RPL29
ORF7a	RPL29
nsp2	RPL29
nsp8	RPL29
M	RPL3
N	RPL3
ORF1ab	RPL3
ORF3a	RPL3
ORF6	RPL3
ORF7a	RPL3
ORF7b	RPL3
ORF9c	RPL3
nsp4	RPL3
nsp6	RPL3
nsp12	RPL3
nsp13	RPL3
nsp14	RPL3
E	RPL30
M	RPL30
N	RPL30
ORF1ab	RPL30
ORF3a	RPL30
ORF6	RPL30
ORF7a	RPL30
ORF7b	RPL30
ORF9c	RPL30
S	RPL30
nsp3	RPL30
nsp4	RPL30
nsp5	RPL30
nsp6	RPL30
nsp13	RPL30
nsp14	RPL30
N	RPL31
ORF1ab	RPL31
ORF9c	RPL31
E	RPL32
M	RPL32
ORF7b	RPL32
ORF9c	RPL32
nsp4	RPL32
nsp5	RPL32
nsp6	RPL32
N	RPL34
N	RPL35
ORF1ab	RPL35
ORF6	RPL35
ORF8	RPL35
ORF9c	RPL35
M	RPL35A
N	RPL35A
ORF3a	RPL35A
ORF3b	RPL35A
ORF6	RPL35A
ORF7a	RPL35A
ORF7b	RPL35A
S	RPL35A
nsp4	RPL35A
nsp5	RPL35A
nsp6	RPL35A
nsp13	RPL35A
N	RPL36
ORF6	RPL36
ORF8	RPL36
ORF9b	RPL36
ORF9c	RPL36
ORF10	RPL36
E	RPL36AL
M	RPL36AL
N	RPL36AL
ORF3a	RPL36AL
ORF7a	RPL36AL
S	RPL36AL
nsp4	RPL36AL
nsp5	RPL36AL
nsp6	RPL36AL
nsp13	RPL36AL
nsp14	RPL36AL
N	RPL37
M	RPL37A
N	RPL37A
ORF3a	RPL37A
ORF7a	RPL37A
nsp4	RPL37A
nsp6	RPL37A
nsp13	RPL37A
M	RPL38
ORF3a	RPL38
ORF8	RPL38
nsp3	RPL38
nsp4	RPL38
nsp5	RPL38
nsp6	RPL38
nsp7	RPL38
nsp9	RPL38
nsp16	RPL38
E	RPL39
N	RPL39
N	RPL4
ORF6	RPL4
ORF8	RPL4
ORF9c	RPL4
ORF14	RPL4
nsp12	RPL4
M	RPL5
N	RPL5
ORF1ab	RPL5
ORF6	RPL5
M	RPL6
N	RPL6
ORF6	RPL6
ORF7a	RPL6
ORF9c	RPL6
nsp1	RPL6
nsp4	RPL6
nsp5	RPL6
nsp6	RPL6
nsp13	RPL6
E	RPL7
M	RPL7
N	RPL7
ORF3a	RPL7
ORF3b	RPL7
ORF6	RPL7
ORF7a	RPL7
ORF7b	RPL7
ORF9c	RPL7
nsp4	RPL7
nsp5	RPL7
nsp6	RPL7
nsp13	RPL7
nsp14	RPL7
E	RPL7A
M	RPL7A
N	RPL7A
ORF3a	RPL7A
ORF3b	RPL7A
ORF6	RPL7A
ORF7a	RPL7A
ORF7b	RPL7A
ORF9c	RPL7A
ORF14	RPL7A
nsp2	RPL7A
nsp4	RPL7A
nsp5	RPL7A
nsp6	RPL7A
nsp13	RPL7A
E	RPL8
M	RPL8
N	RPL8
ORF3a	RPL8
ORF3b	RPL8
ORF6	RPL8
ORF7a	RPL8
ORF7b	RPL8
ORF8	RPL8
ORF9c	RPL8
nsp4	RPL8
nsp5	RPL8
nsp6	RPL8
nsp13	RPL8
E	RPL9
M	RPL9
N	RPL9
ORF3a	RPL9
ORF3b	RPL9
ORF6	RPL9
ORF7a	RPL9
ORF7b	RPL9
ORF8	RPL9
ORF9c	RPL9
nsp4	RPL9
nsp5	RPL9
nsp6	RPL9
nsp13	RPL9
nsp14	RPL9
N	RPLP0
ORF9c	RPLP0
N	RPLP1
ORF14	RPLP1
N	RPLP2
ORF9c	RPLP2
nsp5	RPLP2
E	RPS10
N	RPS10
ORF6	RPS10
ORF7b	RPS10
ORF8	RPS10
ORF10	RPS10
S	RPS10
nsp1	RPS10
nsp1	RPS10
nsp1	RPS10
nsp4	RPS10
nsp14	RPS10
M	RPS11
N	RPS11
ORF1ab	RPS11
ORF3a	RPS11
ORF7a	RPS11
ORF7b	RPS11
ORF9c	RPS11
nsp3	RPS11
nsp4	RPS11
nsp5	RPS11
nsp6	RPS11
nsp13	RPS11
N	RPS12
ORF9c	RPS12
nsp1	RPS12
nsp13	RPS12
nsp15	RPS12
N	RPS13
ORF6	RPS13
ORF8	RPS13
ORF9c	RPS13
N	RPS14
N	RPS15
ORF6	RPS15
ORF9c	RPS15
nsp2	RPS15
N	RPS15A
ORF7a	RPS15A
ORF9c	RPS15A
nsp1	RPS15A
E	RPS16
M	RPS16
ORF3a	RPS16
ORF3b	RPS16
ORF7a	RPS16
ORF7b	RPS16
ORF8	RPS16
S	RPS16
nsp1	RPS16
nsp1	RPS16
nsp3	RPS16
nsp4	RPS16
nsp5	RPS16
nsp6	RPS16
nsp10	RPS16
nsp16	RPS16
N	RPS17
ORF1ab	RPS17
ORF9c	RPS17
nsp9	RPS17
ORF6	RPS18
ORF8	RPS18
ORF10	RPS18
nsp1	RPS18
nsp3	RPS18
nsp9	RPS18
nsp12	RPS18
nsp13	RPS18
M	RPS19
ORF6	RPS19
ORF8	RPS19
ORF9c	RPS19
ORF14	RPS19
nsp1	RPS19
nsp2	RPS19
nsp4	RPS19
nsp12	RPS19
N	RPS2
ORF6	RPS2
ORF9c	RPS2
nsp1	RPS2
nsp3	RPS2
nsp8	RPS2
nsp9	RPS2
ORF3b	RPS20
nsp1	RPS20
nsp15	RPS20
ORF6	RPS21
nsp1	RPS21
nsp14	RPS21
nsp15	RPS21
M	RPS23
ORF6	RPS23
ORF7b	RPS23
nsp4	RPS23
nsp6	RPS23
E	RPS24
M	RPS24
N	RPS24
ORF3a	RPS24
ORF6	RPS24
ORF7a	RPS24
ORF7b	RPS24
S	RPS24
nsp1	RPS24
nsp4	RPS24
nsp5	RPS24
nsp6	RPS24
nsp13	RPS24
nsp14	RPS24
ORF6	RPS25
ORF8	RPS25
ORF9c	RPS25
M	RPS26
N	RPS26
[truncated: 625 more rows]
